# Supplementary material for: Exploring the Causal Roles of Circulating Remnant Lipid Profile on Cardiovascular and Cerebrovascular Diseases: Mendelian Randomization Study
Source: PubMed Central journal article supplement (PMC8979919; doi:10.2188/jea.je20200305), 2022-05-05
Supplement: je-32-205-s001.pdf [file je-32-205-s001.pdf]

## **Exploring the causal roles of circulating remnant lipid profile on cardiovascular and cerebrovascular diseases: Mendelian randomization study**

**Running title:** Causal effect of remnant lipid profiles on CVD

**Authors:** Shucheng Si<sup>1</sup>, PhD, Lei Hou<sup>1</sup>, PhD, Xiaolu Chen<sup>1</sup>, MSc, Wenchao Li<sup>1</sup>, MSc, Xinhui Liu<sup>1</sup>, MSc, Congcong Liu<sup>1</sup>, MSc, Yunxia Li<sup>1</sup>, MSc, Tonghui Yuan<sup>1</sup>, MSc, Jiqing Li<sup>1</sup>, PhD, Bojie Wang<sup>1</sup>, MSc, Hongkai Li<sup>1,2</sup>, PhD, Fuzhong Xue<sup>1,2,3</sup>, PhD

1. Department of Biostatistics, School of Public Health, Cheeloo College of Medicine, Shandong University, Jinan, 250012, China.

2. Institute for Medical Dataology, Shandong University, Jinan, 250002, China.

3. National Institute of Health Data Science of China, China.

**Correspondence to:** Fuzhong Xue, PhD, Department of Biostatistics, School of Public Health, Cheeloo College of Medicine, Shandong University, No.44 Wenhuxi Road, Jinan, 250012, China. (Email: xuefzh@sdu.edu.cn; Tel: (+86)-531-88380280; Fax: (+86)-531-88380280).

**Conflict of interest:** The authors do not have any conflict of interest.

**eTable 1. Detailed information about instrumental SNPs for each pair of exposure-outcome.**

| No. | SNP         | chr | pos       | exposure | outcome                | beta.x   | se.x    | beta.y     | se.y     | gene  | left_gene    | right_gene   |
|-----|-------------|-----|-----------|----------|------------------------|----------|---------|------------|----------|-------|--------------|--------------|
| 1   | rs144064722 | 4   | 73406173  | ApoA1    | Coronary heart disease | 0.203723 | 0.03504 | 0.028313   | 0.031588 |       |              |              |
| 2   | rs144064722 | 4   | 73406173  | ApoA1    | Myocardial infarction  | 0.203723 | 0.03504 | 0.032534   | 0.034056 |       |              |              |
| 3   | rs1461729   | 8   | 9187242   | ApoA1    | Coronary heart disease | 0.086363 | 0.01519 | 0.010384   | 0.015457 |       | PPP1R3B      | LOC100129150 |
| 4   | rs1461729   | 8   | 9187242   | ApoA1    | Ischemic stroke        | 0.086363 | 0.01519 | -0.0261    | 0.0274   |       | PPP1R3B      | LOC100129150 |
| 5   | rs1461729   | 8   | 9187242   | ApoA1    | Myocardial infarction  | 0.086363 | 0.01519 | 0.00022829 | 0.017174 |       | PPP1R3B      | LOC100129150 |
| 6   | rs1461729   | 8   | 9187242   | ApoA1    | Cardioembolic stroke   | 0.086363 | 0.01519 | -0.0919    | 0.0537   |       | PPP1R3B      | LOC100129150 |
| 7   | rs1461729   | 8   | 9187242   | ApoA1    | Large vessel disease   | 0.086363 | 0.01519 | -0.0264    | 0.0594   |       | PPP1R3B      | LOC100129150 |
| 8   | rs1461729   | 8   | 9187242   | ApoA1    | Small vessel disease   | 0.086363 | 0.01519 | -0.0119    | 0.0603   |       | PPP1R3B      | LOC100129150 |
| 9   | rs174594    | 11  | 61623140  | ApoA1    | Large vessel disease   | 0.071714 | 0.0105  | 0.0832     | 0.0401   | FADS2 | LOC100131326 | FADS3        |
| 10  | rs174594    | 11  | 61619829  | ApoA1    | Myocardial infarction  | 0.071714 | 0.0105  | 0.0196856  | 0.0115   | FADS2 | LOC100131326 | FADS3        |
| 11  | rs174594    | 11  | 61623140  | ApoA1    | Cardioembolic stroke   | 0.071714 | 0.0105  | 0.0366     | 0.0374   | FADS2 | LOC100131326 | FADS3        |
| 12  | rs174594    | 11  | 61623140  | ApoA1    | Ischemic stroke        | 0.071714 | 0.0105  | 0.0452     | 0.0185   | FADS2 | LOC100131326 | FADS3        |
| 13  | rs174594    | 11  | 61623140  | ApoA1    | Small vessel disease   | 0.071714 | 0.0105  | -0.0368    | 0.041    | FADS2 | LOC100131326 | FADS3        |
| 14  | rs174594    | 11  | 61619829  | ApoA1    | Coronary heart disease | 0.071714 | 0.0105  | 0.016821   | 0.010328 | FADS2 | LOC100131326 | FADS3        |
| 15  | rs1883025   | 9   | 107664301 | ApoA1    | Cardioembolic stroke   | -0.07984 | 0.01332 | -0.0129    | 0.0368   | ABCA1 | NIPSNAP3B    | SLC44A1      |
| 16  | rs1883025   | 9   | 107664301 | ApoA1    | Large vessel disease   | -0.07984 | 0.01332 | -0.0302    | 0.04     | ABCA1 | NIPSNAP3B    | SLC44A1      |
| 17  | rs1883025   | 9   | 107664301 | ApoA1    | Ischemic stroke        | -0.07984 | 0.01332 | 0.021      | 0.0189   | ABCA1 | NIPSNAP3B    | SLC44A1      |
| 18  | rs1883025   | 9   | 107664301 | ApoA1    | Coronary heart disease | -0.07984 | 0.01332 | -0.025887  | 0.010457 | ABCA1 | NIPSNAP3B    | SLC44A1      |
| 19  | rs1883025   | 9   | 107664301 | ApoA1    | Small vessel disease   | -0.07984 | 0.01332 | 0.1045     | 0.0409   | ABCA1 | NIPSNAP3B    | SLC44A1      |
| 20  | rs1883025   | 9   | 107664301 | ApoA1    | Myocardial infarction  | -0.07984 | 0.01332 | -0.0258134 | 0.011584 | ABCA1 | NIPSNAP3B    | SLC44A1      |
| 21  | rs247617    | 16  | 56993324  | ApoA1    | Cardioembolic stroke   | 0.197243 | 0.01169 | 0.0074     | 0.0345   |       | HERPUD1      | CETP         |
| 22  | rs247617    | 16  | 56993324  | ApoA1    | Small vessel disease   | 0.197243 | 0.01169 | 0.0027     | 0.0382   |       | HERPUD1      | CETP         |
| 23  | rs247617    | 16  | 56993324  | ApoA1    | Ischemic stroke        | 0.197243 | 0.01169 | 0.0102     | 0.0175   |       | HERPUD1      | CETP         |
| 24  | rs247617    | 16  | 56990716  | ApoA1    | Myocardial infarction  | 0.197243 | 0.01169 | -0.0261377 | 0.011415 |       | HERPUD1      | CETP         |
| 25  | rs247617    | 16  | 56990716  | ApoA1    | Coronary heart disease | 0.197243 | 0.01169 | -0.030884  | 0.010212 |       | HERPUD1      | CETP         |
| 26  | rs247617    | 16  | 56993324  | ApoA1    | Large vessel disease   | 0.197243 | 0.01169 | 0.0256     | 0.0369   |       | HERPUD1      | CETP         |
| 27  | rs261291    | 15  | 58683366  | ApoA1    | Ischemic stroke        | 0.144314 | 0.01091 | -0.0215    | 0.0161   |       | LOC441726    | LIPC         |
| 28  | rs261291    | 15  | 58680178  | ApoA1    | Myocardial infarction  | 0.144314 | 0.01091 | 0.00516156 | 0.010716 |       | LOC441726    | LIPC         |
| 29  | rs261291    | 15  | 58683366  | ApoA1    | Small vessel disease   | 0.144314 | 0.01091 | -0.0405    | 0.0359   |       | LOC441726    | LIPC         |
| 30  | rs261291    | 15  | 58683366  | ApoA1    | Large vessel disease   | 0.144314 | 0.01091 | -0.016     | 0.0343   |       | LOC441726    | LIPC         |
| 31  | rs261291    | 15  | 58680178  | ApoA1    | Coronary heart disease | 0.144314 | 0.01091 | 0.012987   | 0.009619 |       | LOC441726    | LIPC         |
| 32  | rs261291    | 15  | 58683366  | ApoA1    | Cardioembolic stroke   | 0.144314 | 0.01091 | -0.0091    | 0.0317   |       | LOC441726    | LIPC         |
| 33  | rs261334    | 15  | 58726744  | ApoA1    | Ischemic stroke        | -0.15655 | 0.01256 | 0.0383     | 0.0211   | LIPC  | LOC441726    | ADAM10       |
| 34  | rs261334    | 15  | 58726744  | ApoA1    | Cardioembolic stroke   | -0.15655 | 0.01256 | 0.0623     | 0.0423   | LIPC  | LOC441726    | ADAM10       |
| 35  | rs261334    | 15  | 58726744  | ApoA1    | Coronary heart disease | -0.15655 | 0.01256 | -0.03756   | 0.011043 | LIPC  | LOC441726    | ADAM10       |
| 36  | rs261334    | 15  | 58726744  | ApoA1    | Small vessel disease   | -0.15655 | 0.01256 | -0.0739    | 0.0451   | LIPC  | LOC441726    | ADAM10       |
| 37  | rs261334    | 15  | 58726744  | ApoA1    | Myocardial infarction  | -0.15655 | 0.01256 | -0.0402744 | 0.012395 | LIPC  | LOC441726    | ADAM10       |
| 38  | rs261334    | 15  | 58726744  | ApoA1    | Large vessel disease   | -0.15655 | 0.01256 | 0.0677     | 0.0452   | LIPC  | LOC441726    | ADAM10       |
| 39  | rs4860951   | 4   | 69375736  | ApoA1    | Coronary heart disease | 0.073728 | 0.01322 | 0.040654   | 0.016657 |       | TMPRSS11E    | UGT2B29P     |

|    |             |    |          |       |                        |          |         |            |          |       |           |              |
|----|-------------|----|----------|-------|------------------------|----------|---------|------------|----------|-------|-----------|--------------|
| 40 | rs4860951   | 4  | 69375736 | ApoA1 | Myocardial infarction  | 0.073728 | 0.01322 | 0.0228272  | 0.017995 |       | TMPRSS11E | UGT2B29P     |
| 41 | rs4939873   | 18 | 47062054 | ApoA1 | Large vessel disease   | 0.13435  | 0.02395 | -0.0047    | 0.1188   |       | LOC647073 | LIPG         |
| 42 | rs4939873   | 18 | 47062054 | ApoA1 | Cardioembolic stroke   | 0.13435  | 0.02395 | 0.1185     | 0.0976   |       | LOC647073 | LIPG         |
| 43 | rs4939873   | 18 | 47062054 | ApoA1 | Small vessel disease   | 0.13435  | 0.02395 | 0.0847     | 0.1432   |       | LOC647073 | LIPG         |
| 44 | rs4939873   | 18 | 47062054 | ApoA1 | Coronary heart disease | 0.13435  | 0.02395 | 0.012152   | 0.03531  |       | LOC647073 | LIPG         |
| 45 | rs4939873   | 18 | 47062054 | ApoA1 | Myocardial infarction  | 0.13435  | 0.02395 | 0.0301786  | 0.03942  |       | LOC647073 | LIPG         |
| 46 | rs4939873   | 18 | 47062054 | ApoA1 | Ischemic stroke        | 0.13435  | 0.02395 | -0.0123    | 0.0573   |       | LOC647073 | LIPG         |
| 47 | rs5880      | 16 | 57015091 | ApoA1 | Coronary heart disease | -0.18686 | 0.03198 | 0.007277   | 0.022421 | CETP  | HERPUD1   | LOC100130044 |
| 48 | rs5880      | 16 | 57015091 | ApoA1 | Myocardial infarction  | -0.18686 | 0.03198 | 0.0247342  | 0.0245   | CETP  | HERPUD1   | LOC100130044 |
| 49 | rs5880      | 16 | 57015091 | ApoA1 | Large vessel disease   | -0.18686 | 0.03198 | -0.0992    | 0.0884   | CETP  | HERPUD1   | LOC100130044 |
| 50 | rs5880      | 16 | 57015091 | ApoA1 | Ischemic stroke        | -0.18686 | 0.03198 | 0.0364     | 0.0422   | CETP  | HERPUD1   | LOC100130044 |
| 51 | rs5880      | 16 | 57015091 | ApoA1 | Cardioembolic stroke   | -0.18686 | 0.03198 | 0.0874     | 0.0838   | CETP  | HERPUD1   | LOC100130044 |
| 52 | rs5880      | 16 | 57015091 | ApoA1 | Small vessel disease   | -0.18686 | 0.03198 | -0.0283    | 0.0961   | CETP  | HERPUD1   | LOC100130044 |
| 53 | rs6494025   | 15 | 58876786 | ApoA1 | Ischemic stroke        | 0.184905 | 0.02993 | -0.047     | 0.048    |       | LIPC      | ADAM10       |
| 54 | rs6494025   | 15 | 58876786 | ApoA1 | Large vessel disease   | 0.184905 | 0.02993 | -0.0016    | 0.0975   |       | LIPC      | ADAM10       |
| 55 | rs6494025   | 15 | 58876786 | ApoA1 | Coronary heart disease | 0.184905 | 0.02993 | 0.043578   | 0.02554  |       | LIPC      | ADAM10       |
| 56 | rs6494025   | 15 | 58876786 | ApoA1 | Myocardial infarction  | 0.184905 | 0.02993 | 0.0413404  | 0.029307 |       | LIPC      | ADAM10       |
| 57 | rs6494025   | 15 | 58876786 | ApoA1 | Small vessel disease   | 0.184905 | 0.02993 | -0.0599    | 0.1171   |       | LIPC      | ADAM10       |
| 58 | rs6494025   | 15 | 58876786 | ApoA1 | Cardioembolic stroke   | 0.184905 | 0.02993 | -0.0048    | 0.0842   |       | LIPC      | ADAM10       |
| 59 | rs6507939   | 18 | 47176261 | ApoA1 | Coronary heart disease | 0.108424 | 0.01427 | -0.024621  | 0.013496 |       | LIPG      | LOC100129143 |
| 60 | rs6507939   | 18 | 47176261 | ApoA1 | Ischemic stroke        | 0.108424 | 0.01427 | -0.0068    | 0.0237   |       | LIPG      | LOC100129143 |
| 61 | rs6507939   | 18 | 47176261 | ApoA1 | Large vessel disease   | 0.108424 | 0.01427 | 0.0528     | 0.0514   |       | LIPG      | LOC100129143 |
| 62 | rs6507939   | 18 | 47176261 | ApoA1 | Myocardial infarction  | 0.108424 | 0.01427 | -0.0174663 | 0.015114 |       | LIPG      | LOC100129143 |
| 63 | rs6507939   | 18 | 47176261 | ApoA1 | Cardioembolic stroke   | 0.108424 | 0.01427 | 0.0079     | 0.0479   |       | LIPG      | LOC100129143 |
| 64 | rs6507939   | 18 | 47176261 | ApoA1 | Small vessel disease   | 0.108424 | 0.01427 | -0.0005    | 0.0522   |       | LIPG      | LOC100129143 |
| 65 | rs75835816  | 8  | 19885513 | ApoA1 | Myocardial infarction  | -0.22095 | 0.0388  | 0.0295779  | 0.050057 |       |           |              |
| 66 | rs75835816  | 8  | 19885513 | ApoA1 | Coronary heart disease | -0.22095 | 0.0388  | 0.066618   | 0.043542 |       |           |              |
| 67 | rs10056811  | 5  | 74605220 | ApoB  | Myocardial infarction  | 0.085783 | 0.01057 | 0.0221538  | 0.010655 |       | ANKRD31   | LOC728775    |
| 68 | rs10056811  | 5  | 74605220 | ApoB  | Cardioembolic stroke   | 0.085783 | 0.01057 | -0.023     | 0.0348   |       | ANKRD31   | LOC728775    |
| 69 | rs10056811  | 5  | 74605220 | ApoB  | Coronary heart disease | 0.085783 | 0.01057 | 0.025525   | 0.009749 |       | ANKRD31   | LOC728775    |
| 70 | rs10056811  | 5  | 74605220 | ApoB  | Large vessel disease   | 0.085783 | 0.01057 | -0.0701    | 0.038    |       | ANKRD31   | LOC728775    |
| 71 | rs10056811  | 5  | 74605220 | ApoB  | Small vessel disease   | 0.085783 | 0.01057 | 0.0149     | 0.0382   |       | ANKRD31   | LOC728775    |
| 72 | rs10056811  | 5  | 74605220 | ApoB  | Ischemic stroke        | 0.085783 | 0.01057 | -0.0082    | 0.0176   |       | ANKRD31   | LOC728775    |
| 73 | rs1081105   | 19 | 45412955 | ApoB  | Coronary heart disease | 0.222868 | 0.03928 | 0.086187   | 0.041158 | APOE  | APOE      | APOC1        |
| 74 | rs1081105   | 19 | 45412955 | ApoB  | Myocardial infarction  | 0.222868 | 0.03928 | 0.142826   | 0.048309 | APOE  | APOE      | APOC1        |
| 75 | rs115849089 | 8  | 19912370 | ApoB  | Myocardial infarction  | -0.09957 | 0.01713 | -0.0667741 | 0.017021 |       |           |              |
| 76 | rs115849089 | 8  | 19912370 | ApoB  | Coronary heart disease | -0.09957 | 0.01713 | -0.057989  | 0.015294 |       |           |              |
| 77 | rs11591147  | 1  | 55505647 | ApoB  | Myocardial infarction  | -0.43794 | 0.0353  | -0.354653  | 0.068555 | PCSK9 | BSND      | USP24        |
| 78 | rs11591147  | 1  | 55505647 | ApoB  | Coronary heart disease | -0.43794 | 0.0353  | -0.256502  | 0.057259 | PCSK9 | BSND      | USP24        |
| 79 | rs1168041   | 1  | 62960250 | ApoB  | Small vessel disease   | 0.070994 | 0.01146 | -0.0781    | 0.0389   | DOCK7 | USP1      | ANGPTL3      |
| 80 | rs1168041   | 1  | 62960250 | ApoB  | Large vessel disease   | 0.070994 | 0.01146 | -0.0152    | 0.0373   | DOCK7 | USP1      | ANGPTL3      |

|     |             |    |          |      |                        |          |         |            |          |         |           |              |
|-----|-------------|----|----------|------|------------------------|----------|---------|------------|----------|---------|-----------|--------------|
| 81  | rs1168041   | 1  | 62960250 | ApoB | Coronary heart disease | 0.070994 | 0.01146 | 0.011014   | 0.01011  | DOCK7   | USP1      | ANGPTL3      |
| 82  | rs1168041   | 1  | 62960250 | ApoB | Ischemic stroke        | 0.070994 | 0.01146 | -0.0095    | 0.0178   | DOCK7   | USP1      | ANGPTL3      |
| 83  | rs1168041   | 1  | 62960250 | ApoB | Cardioembolic stroke   | 0.070994 | 0.01146 | -0.0236    | 0.0353   | DOCK7   | USP1      | ANGPTL3      |
| 84  | rs1168041   | 1  | 62960250 | ApoB | Myocardial infarction  | 0.070994 | 0.01146 | 0.00067632 | 0.011148 | DOCK7   | USP1      | ANGPTL3      |
| 85  | rs1260326   | 2  | 27730940 | ApoB | Myocardial infarction  | -0.06679 | 0.01039 | 0.00111651 | 0.010666 | GCKR    | FNDC4     | LOC100130981 |
| 86  | rs1260326   | 2  | 27730940 | ApoB | Large vessel disease   | -0.06679 | 0.01039 | 0.0392     | 0.0341   | GCKR    | FNDC4     | LOC100130981 |
| 87  | rs1260326   | 2  | 27730940 | ApoB | Cardioembolic stroke   | -0.06679 | 0.01039 | 0.0401     | 0.0314   | GCKR    | FNDC4     | LOC100130981 |
| 88  | rs1260326   | 2  | 27730940 | ApoB | Coronary heart disease | -0.06679 | 0.01039 | 0.003257   | 0.00962  | GCKR    | FNDC4     | LOC100130981 |
| 89  | rs1260326   | 2  | 27730940 | ApoB | Ischemic stroke        | -0.06679 | 0.01039 | 0.012      | 0.0162   | GCKR    | FNDC4     | LOC100130981 |
| 90  | rs1260326   | 2  | 27730940 | ApoB | Small vessel disease   | -0.06679 | 0.01039 | -0.0441    | 0.0353   | GCKR    | FNDC4     | LOC100130981 |
| 91  | rs1367117   | 2  | 21263900 | ApoB | Large vessel disease   | 0.108852 | 0.01119 | -0.0405    | 0.0398   | APOB    | C2orf43   | LOC100129278 |
| 92  | rs1367117   | 2  | 21263900 | ApoB | Ischemic stroke        | 0.108852 | 0.01119 | 0.0067     | 0.0188   | APOB    | C2orf43   | LOC100129278 |
| 93  | rs1367117   | 2  | 21263900 | ApoB | Cardioembolic stroke   | 0.108852 | 0.01119 | -0.0051    | 0.0375   | APOB    | C2orf43   | LOC100129278 |
| 94  | rs1367117   | 2  | 21263900 | ApoB | Myocardial infarction  | 0.108852 | 0.01119 | 0.0382631  | 0.01173  | APOB    | C2orf43   | LOC100129278 |
| 95  | rs1367117   | 2  | 21263900 | ApoB | Small vessel disease   | 0.108852 | 0.01119 | 0.0213     | 0.0414   | APOB    | C2orf43   | LOC100129278 |
| 96  | rs1367117   | 2  | 21263900 | ApoB | Coronary heart disease | 0.108852 | 0.01119 | 0.041139   | 0.010635 | APOB    | C2orf43   | LOC100129278 |
| 97  | rs137992968 | 19 | 11239696 | ApoB | Myocardial infarction  | -0.19469 | 0.03466 | -0.0815463 | 0.039958 |         |           |              |
| 98  | rs137992968 | 19 | 11239696 | ApoB | Coronary heart disease | -0.19469 | 0.03466 | -0.071649  | 0.036181 |         |           |              |
| 99  | rs142130958 | 19 | 11202306 | ApoB | Large vessel disease   | -0.19965 | 0.01674 | -0.0924    | 0.0525   |         |           |              |
| 100 | rs142130958 | 19 | 11202306 | ApoB | Ischemic stroke        | -0.19965 | 0.01674 | -0.0708    | 0.0249   |         |           |              |
| 101 | rs142130958 | 19 | 11190652 | ApoB | Coronary heart disease | -0.19965 | 0.01674 | -0.125647  | 0.016786 |         |           |              |
| 102 | rs142130958 | 19 | 11190652 | ApoB | Myocardial infarction  | -0.19965 | 0.01674 | -0.100247  | 0.018695 |         |           |              |
| 103 | rs142130958 | 19 | 11202306 | ApoB | Small vessel disease   | -0.19965 | 0.01674 | -0.013     | 0.0549   |         |           |              |
| 104 | rs142130958 | 19 | 11202306 | ApoB | Cardioembolic stroke   | -0.19965 | 0.01674 | -0.0567    | 0.048    |         |           |              |
| 105 | rs143341434 | 1  | 54759547 | ApoB | Myocardial infarction  | -0.21853 | 0.02904 | -0.0393462 | 0.060482 |         |           |              |
| 106 | rs143341434 | 1  | 54759547 | ApoB | Coronary heart disease | -0.21853 | 0.02904 | -0.016655  | 0.053934 |         |           |              |
| 107 | rs144064722 | 4  | 73406173 | ApoB | Coronary heart disease | 0.199001 | 0.03506 | 0.028313   | 0.031588 |         |           |              |
| 108 | rs144064722 | 4  | 73406173 | ApoB | Myocardial infarction  | 0.199001 | 0.03506 | 0.032534   | 0.034056 |         |           |              |
| 109 | rs150617279 | 19 | 20139234 | ApoB | Coronary heart disease | -0.11238 | 0.01769 | 0.035103   | 0.023945 |         |           |              |
| 110 | rs150617279 | 19 | 20139234 | ApoB | Myocardial infarction  | -0.11238 | 0.01769 | 0.0521612  | 0.026788 |         |           |              |
| 111 | rs17395160  | 1  | 55085141 | ApoB | Myocardial infarction  | -0.07105 | 0.01234 | -0.013664  | 0.01264  | FAM151A | LOC645436 | C1orf175     |
| 112 | rs17395160  | 1  | 55085141 | ApoB | Ischemic stroke        | -0.07105 | 0.01234 | -0.0578    | 0.0207   | FAM151A | LOC645436 | C1orf175     |
| 113 | rs17395160  | 1  | 55085141 | ApoB | Cardioembolic stroke   | -0.07105 | 0.01234 | -0.0181    | 0.0396   | FAM151A | LOC645436 | C1orf175     |
| 114 | rs17395160  | 1  | 55085141 | ApoB | Small vessel disease   | -0.07105 | 0.01234 | -0.053     | 0.0447   | FAM151A | LOC645436 | C1orf175     |
| 115 | rs17395160  | 1  | 55085141 | ApoB | Large vessel disease   | -0.07105 | 0.01234 | -0.1123    | 0.0423   | FAM151A | LOC645436 | C1orf175     |
| 116 | rs17395160  | 1  | 55085141 | ApoB | Coronary heart disease | -0.07105 | 0.01234 | -0.012783  | 0.011336 | FAM151A | LOC645436 | C1orf175     |
| 117 | rs1883711   | 20 | 39179822 | ApoB | Coronary heart disease | 0.144092 | 0.02526 | 0.133601   | 0.034913 |         | HSPEP1    | MAFB         |
| 118 | rs1883711   | 20 | 39179822 | ApoB | Cardioembolic stroke   | 0.144092 | 0.02526 | 0.178      | 0.205    |         | HSPEP1    | MAFB         |
| 119 | rs1883711   | 20 | 39179822 | ApoB | Myocardial infarction  | 0.144092 | 0.02526 | 0.0985739  | 0.040277 |         | HSPEP1    | MAFB         |
| 120 | rs207179    | 1  | 55788230 | ApoB | Ischemic stroke        | 0.108802 | 0.01744 | -0.0057    | 0.0275   |         | LOC645506 | GOT2L1       |
| 121 | rs207179    | 1  | 55788230 | ApoB | Cardioembolic stroke   | 0.108802 | 0.01744 | -0.0576    | 0.0547   |         | LOC645506 | GOT2L1       |

|     |            |    |           |      |                        |          |         |             |          |              |              |              |
|-----|------------|----|-----------|------|------------------------|----------|---------|-------------|----------|--------------|--------------|--------------|
| 122 | rs207179   | 1  | 55788230  | ApoB | Small vessel disease   | 0.108802 | 0.01744 | -0.0849     | 0.06     |              | LOC645506    | GOT2L1       |
| 123 | rs207179   | 1  | 55788230  | ApoB | Coronary heart disease | 0.108802 | 0.01744 | -0.007173   | 0.017729 |              | LOC645506    | GOT2L1       |
| 124 | rs207179   | 1  | 55788230  | ApoB | Myocardial infarction  | 0.108802 | 0.01744 | -0.00771559 | 0.019203 |              | LOC645506    | GOT2L1       |
| 125 | rs207179   | 1  | 55788230  | ApoB | Large vessel disease   | 0.108802 | 0.01744 | -0.0055     | 0.0592   |              | LOC645506    | GOT2L1       |
| 126 | rs2495477  | 1  | 55518467  | ApoB | Myocardial infarction  | -0.0619  | 0.01101 | -0.0362507  | 0.011685 | PCSK9        | BSND         | USP24        |
| 127 | rs2495477  | 1  | 55518467  | ApoB | Coronary heart disease | -0.0619  | 0.01101 | -0.035937   | 0.010473 | PCSK9        | BSND         | USP24        |
| 128 | rs2980875  | 8  | 126481747 | ApoB | Small vessel disease   | -0.06968 | 0.00999 | -0.0521     | 0.0356   |              | TRIB1        | LOC100130231 |
| 129 | rs2980875  | 8  | 126481747 | ApoB | Myocardial infarction  | -0.06968 | 0.00999 | -0.0432531  | 0.010383 |              | TRIB1        | LOC100130231 |
| 130 | rs2980875  | 8  | 126481747 | ApoB | Large vessel disease   | -0.06968 | 0.00999 | -0.0391     | 0.0344   |              | TRIB1        | LOC100130231 |
| 131 | rs2980875  | 8  | 126481747 | ApoB | Ischemic stroke        | -0.06968 | 0.00999 | -0.0207     | 0.0162   |              | TRIB1        | LOC100130231 |
| 132 | rs2980875  | 8  | 126481747 | ApoB | Cardioembolic stroke   | -0.06968 | 0.00999 | 0.0188      | 0.032    |              | TRIB1        | LOC100130231 |
| 133 | rs2980875  | 8  | 126481747 | ApoB | Coronary heart disease | -0.06968 | 0.00999 | -0.042618   | 0.0093   |              | TRIB1        | LOC100130231 |
| 134 | rs4722043  | 7  | 21697529  | ApoB | Coronary heart disease | -0.06594 | 0.01067 | 0.000996    | 0.010127 | DNAH11       | SP4          | CDCA7L       |
| 135 | rs4722043  | 7  | 21697529  | ApoB | Myocardial infarction  | -0.06594 | 0.01067 | -0.00052221 | 0.011319 | DNAH11       | SP4          | CDCA7L       |
| 136 | rs62123891 | 2  | 21083052  | ApoB | Coronary heart disease | -0.09929 | 0.01522 | -0.019138   | 0.015934 |              | C2orf43      | APOB         |
| 137 | rs62123891 | 2  | 21083052  | ApoB | Myocardial infarction  | -0.09929 | 0.01522 | -0.00474096 | 0.017913 |              | C2orf43      | APOB         |
| 138 | rs629301   | 1  | 109818306 | ApoB | Coronary heart disease | 0.090052 | 0.01219 | 0.101444    | 0.011423 | CELSR2       | SARS         | PSRC1        |
| 139 | rs629301   | 1  | 109818306 | ApoB | Myocardial infarction  | 0.090052 | 0.01219 | 0.0875246   | 0.012685 | CELSR2       | SARS         | PSRC1        |
| 140 | rs629301   | 1  | 109818306 | ApoB | Ischemic stroke        | 0.090052 | 0.01219 | 0.0022      | 0.0191   | CELSR2       | SARS         | PSRC1        |
| 141 | rs629301   | 1  | 109818306 | ApoB | Cardioembolic stroke   | 0.090052 | 0.01219 | 0.0349      | 0.0376   | CELSR2       | SARS         | PSRC1        |
| 142 | rs629301   | 1  | 109818306 | ApoB | Small vessel disease   | 0.090052 | 0.01219 | -0.0002     | 0.0422   | CELSR2       | SARS         | PSRC1        |
| 143 | rs629301   | 1  | 109818306 | ApoB | Large vessel disease   | 0.090052 | 0.01219 | 0.1         | 0.0414   | CELSR2       | SARS         | PSRC1        |
| 144 | rs635634   | 9  | 136155000 | ApoB | Coronary heart disease | 0.073971 | 0.01261 | 0.077157    | 0.011712 |              | ABO          | LOC653163    |
| 145 | rs635634   | 9  | 136155000 | ApoB | Myocardial infarction  | 0.073971 | 0.01261 | 0.10933     | 0.013093 |              | ABO          | LOC653163    |
| 146 | rs6756629  | 2  | 44065090  | ApoB | Cardioembolic stroke   | -0.11325 | 0.01857 | -0.1936     | 0.069    | ABCG5        |              |              |
| 147 | rs6756629  | 2  | 44065090  | ApoB | Myocardial infarction  | -0.11325 | 0.01857 | -0.0798551  | 0.023391 | ABCG8        | DYNC2LI1     | ABCG8        |
| 148 | rs6756629  | 2  | 44065090  | ApoB | Ischemic stroke        | -0.11325 | 0.01857 | -0.1013     | 0.0335   | ABCG5        |              |              |
| 149 | rs6756629  | 2  | 44065090  | ApoB | Large vessel disease   | -0.11325 | 0.01857 | -0.1785     | 0.074    | ABCG8        | DYNC2LI1     | ABCG8        |
| 150 | rs6756629  | 2  | 44065090  | ApoB | Small vessel disease   | -0.11325 | 0.01857 | -0.0699     | 0.0738   | ABCG5        |              |              |
| 151 | rs6756629  | 2  | 44065090  | ApoB | Coronary heart disease | -0.11325 | 0.01857 | -0.098614   | 0.020976 | ABCG8        | DYNC2LI1     | ABCG8        |
| 152 | rs7256200  | 19 | 45415935  | ApoB | Myocardial infarction  | 0.177158 | 0.01443 | 0.0922879   | 0.017993 | APOC1        | APOE         | APOC1        |
| 153 | rs7256200  | 19 | 45415935  | ApoB | Coronary heart disease | 0.177158 | 0.01443 | 0.09126     | 0.016203 | APOC1        | APOE         | APOC1        |
| 154 | rs7412     | 19 | 45412079  | ApoB | Myocardial infarction  | -0.42755 | 0.02598 | -0.122218   | 0.023946 | APOE         | LOC100129500 |              |
|     |            |    |           |      |                        |          |         |             |          | LOC100129500 | TOMM40       | APOC1        |

|     |             |    |           |       |                        |          |         |            |          |              | APOE         |              |
|-----|-------------|----|-----------|-------|------------------------|----------|---------|------------|----------|--------------|--------------|--------------|
|     |             |    |           |       |                        |          |         |            |          |              | LOC100129500 |              |
| 155 | rs7412      | 19 | 45412079  | ApoB  | Coronary heart disease | -0.42755 | 0.02598 | -0.137045  | 0.021092 | LOC100129500 | TOMM40       | APOC1        |
| 156 | rs964184    | 11 | 116648917 | ApoB  | Small vessel disease   | -0.16577 | 0.01427 | -0.0253    | 0.0533   | ZNF259       | BUD13        | ZNF259       |
| 157 | rs964184    | 11 | 116648917 | ApoB  | Ischemic stroke        | -0.16577 | 0.01427 | -0.0074    | 0.024    | ZNF259       | BUD13        | ZNF259       |
| 158 | rs964184    | 11 | 116648917 | ApoB  | Large vessel disease   | -0.16577 | 0.01427 | -0.0184    | 0.0505   | ZNF259       | BUD13        | ZNF259       |
| 159 | rs964184    | 11 | 116648917 | ApoB  | Cardioembolic stroke   | -0.16577 | 0.01427 | -0.0127    | 0.0464   | ZNF259       | BUD13        | ZNF259       |
| 160 | rs964184    | 11 | 116648917 | ApoB  | Myocardial infarction  | -0.16577 | 0.01427 | -0.0487708 | 0.013873 | ZNF259       | BUD13        | ZNF259       |
| 161 | rs964184    | 11 | 116648917 | ApoB  | Coronary heart disease | -0.16577 | 0.01427 | -0.049958  | 0.012399 | ZNF259       | BUD13        | ZNF259       |
| 162 | rs111894427 | 11 | 116773653 | HDL.C | Large vessel disease   | 0.133814 | 0.02204 | 0.0769     | 0.0962   |              |              |              |
| 163 | rs111894427 | 11 | 116721405 | HDL.C | Myocardial infarction  | 0.133814 | 0.02204 | 0.0070412  | 0.032006 |              |              |              |
| 164 | rs111894427 | 11 | 116721405 | HDL.C | Coronary heart disease | 0.133814 | 0.02204 | -0.032958  | 0.029109 |              |              |              |
| 165 | rs111894427 | 11 | 116773653 | HDL.C | Cardioembolic stroke   | 0.133814 | 0.02204 | 0.0443     | 0.0994   |              |              |              |
| 166 | rs111894427 | 11 | 116773653 | HDL.C | Ischemic stroke        | 0.133814 | 0.02204 | -0.0377    | 0.0497   |              |              |              |
| 167 | rs111894427 | 11 | 116773653 | HDL.C | Small vessel disease   | 0.133814 | 0.02204 | -0.153     | 0.1138   |              |              |              |
| 168 | rs117376818 | 15 | 58798961  | HDL.C | Coronary heart disease | 0.317736 | 0.05697 | -0.009311  | 0.058182 |              |              |              |
| 169 | rs117376818 | 15 | 58798961  | HDL.C | Myocardial infarction  | 0.317736 | 0.05697 | -0.0221881 | 0.065023 |              |              |              |
| 170 | rs1461729   | 8  | 9187242   | HDL.C | Large vessel disease   | 0.093989 | 0.01449 | -0.0264    | 0.0594   |              | PPP1R3B      | LOC100129150 |
| 171 | rs1461729   | 8  | 9187242   | HDL.C | Myocardial infarction  | 0.093989 | 0.01449 | 0.00022829 | 0.017174 |              | PPP1R3B      | LOC100129150 |
| 172 | rs1461729   | 8  | 9187242   | HDL.C | Ischemic stroke        | 0.093989 | 0.01449 | -0.0261    | 0.0274   |              | PPP1R3B      | LOC100129150 |
| 173 | rs1461729   | 8  | 9187242   | HDL.C | Small vessel disease   | 0.093989 | 0.01449 | -0.0119    | 0.0603   |              | PPP1R3B      | LOC100129150 |
| 174 | rs1461729   | 8  | 9187242   | HDL.C | Cardioembolic stroke   | 0.093989 | 0.01449 | -0.0919    | 0.0537   |              | PPP1R3B      | LOC100129150 |
| 175 | rs1461729   | 8  | 9187242   | HDL.C | Coronary heart disease | 0.093989 | 0.01449 | 0.010384   | 0.015457 |              | PPP1R3B      | LOC100129150 |
| 176 | rs16940810  | 15 | 59115159  | HDL.C | Large vessel disease   | 0.186188 | 0.02974 | 0.0414     | 0.1051   | FAM63B       | ADAM10       | LOC729208    |
| 177 | rs16940810  | 15 | 59115159  | HDL.C | Ischemic stroke        | 0.186188 | 0.02974 | 0.0256     | 0.0484   | FAM63B       | ADAM10       | LOC729208    |
| 178 | rs16940810  | 15 | 59115159  | HDL.C | Small vessel disease   | 0.186188 | 0.02974 | 0.0854     | 0.1187   | FAM63B       | ADAM10       | LOC729208    |
| 179 | rs16940810  | 15 | 59115159  | HDL.C | Cardioembolic stroke   | 0.186188 | 0.02974 | 0.1429     | 0.0849   | FAM63B       | ADAM10       | LOC729208    |
| 180 | rs16940810  | 15 | 59115159  | HDL.C | Coronary heart disease | 0.186188 | 0.02974 | 0.045851   | 0.028452 | FAM63B       | ADAM10       | LOC729208    |
| 181 | rs16940810  | 15 | 59115159  | HDL.C | Myocardial infarction  | 0.186188 | 0.02974 | 0.0114989  | 0.031765 | FAM63B       | ADAM10       | LOC729208    |
| 182 | rs174594    | 11 | 61623140  | HDL.C | Cardioembolic stroke   | 0.068823 | 0.01028 | 0.0366     | 0.0374   | FADS2        | LOC100131326 | FADS3        |
| 183 | rs174594    | 11 | 61619829  | HDL.C | Coronary heart disease | 0.068823 | 0.01028 | 0.016821   | 0.010328 | FADS2        | LOC100131326 | FADS3        |
| 184 | rs174594    | 11 | 61623140  | HDL.C | Ischemic stroke        | 0.068823 | 0.01028 | 0.0452     | 0.0185   | FADS2        | LOC100131326 | FADS3        |
| 185 | rs174594    | 11 | 61623140  | HDL.C | Large vessel disease   | 0.068823 | 0.01028 | 0.0832     | 0.0401   | FADS2        | LOC100131326 | FADS3        |
| 186 | rs174594    | 11 | 61619829  | HDL.C | Myocardial infarction  | 0.068823 | 0.01028 | 0.0196856  | 0.0115   | FADS2        | LOC100131326 | FADS3        |
| 187 | rs174594    | 11 | 61623140  | HDL.C | Small vessel disease   | 0.068823 | 0.01028 | -0.0368    | 0.041    | FADS2        | LOC100131326 | FADS3        |
| 188 | rs1800961   | 20 | 43042364  | HDL.C | Coronary heart disease | -0.15675 | 0.02649 | -0.028051  | 0.028278 | HNF4A        | R3HDML       | C2orf62      |
| 189 | rs1800961   | 20 | 43042364  | HDL.C | Myocardial infarction  | -0.15675 | 0.02649 | 0.00598266 | 0.03186  | HNF4A        | R3HDML       | C2orf62      |
| 190 | rs1800961   | 20 | 43042364  | HDL.C | Large vessel disease   | -0.15675 | 0.02649 | -0.0389    | 0.1014   | HNF4A        | R3HDML       | C2orf62      |
| 191 | rs1800961   | 20 | 43042364  | HDL.C | Cardioembolic stroke   | -0.15675 | 0.02649 | 0.0687     | 0.0868   | HNF4A        | R3HDML       | C2orf62      |
| 192 | rs1800961   | 20 | 43042364  | HDL.C | Small vessel disease   | -0.15675 | 0.02649 | -0.0113    | 0.1052   | HNF4A        | R3HDML       | C2orf62      |
| 193 | rs1800961   | 20 | 43042364  | HDL.C | Ischemic stroke        | -0.15675 | 0.02649 | -0.0368    | 0.044    | HNF4A        | R3HDML       | C2orf62      |

|     |           |    |           |       |                        |          |         |            |          |       |           |              |
|-----|-----------|----|-----------|-------|------------------------|----------|---------|------------|----------|-------|-----------|--------------|
| 194 | rs1883025 | 9  | 107664301 | HDL.C | Large vessel disease   | -0.07606 | 0.01246 | -0.0302    | 0.04     | ABCA1 | NIPSNAP3B | SLC44A1      |
| 195 | rs1883025 | 9  | 107664301 | HDL.C | Coronary heart disease | -0.07606 | 0.01246 | -0.025887  | 0.010457 | ABCA1 | NIPSNAP3B | SLC44A1      |
| 196 | rs1883025 | 9  | 107664301 | HDL.C | Ischemic stroke        | -0.07606 | 0.01246 | 0.021      | 0.0189   | ABCA1 | NIPSNAP3B | SLC44A1      |
| 197 | rs1883025 | 9  | 107664301 | HDL.C | Cardioembolic stroke   | -0.07606 | 0.01246 | -0.0129    | 0.0368   | ABCA1 | NIPSNAP3B | SLC44A1      |
| 198 | rs1883025 | 9  | 107664301 | HDL.C | Myocardial infarction  | -0.07606 | 0.01246 | -0.0258134 | 0.011584 | ABCA1 | NIPSNAP3B | SLC44A1      |
| 199 | rs1883025 | 9  | 107664301 | HDL.C | Small vessel disease   | -0.07606 | 0.01246 | 0.1045     | 0.0409   | ABCA1 | NIPSNAP3B | SLC44A1      |
| 200 | rs2070895 | 15 | 58723939  | HDL.C | Coronary heart disease | 0.130965 | 0.01164 | 0.037159   | 0.010782 | LIPC  | LOC441726 | LIPC         |
| 201 | rs2070895 | 15 | 58723939  | HDL.C | Myocardial infarction  | 0.130965 | 0.01164 | 0.0413675  | 0.012105 | LIPC  | LOC441726 | LIPC         |
| 202 | rs2070895 | 15 | 58723939  | HDL.C | Small vessel disease   | 0.130965 | 0.01164 | 0.0715     | 0.0449   | LIPC  | LOC441726 | LIPC         |
| 203 | rs2070895 | 15 | 58723939  | HDL.C | Cardioembolic stroke   | 0.130965 | 0.01164 | -0.0622    | 0.0419   | LIPC  | LOC441726 | LIPC         |
| 204 | rs2070895 | 15 | 58723939  | HDL.C | Ischemic stroke        | 0.130965 | 0.01164 | -0.0355    | 0.0209   | LIPC  | LOC441726 | LIPC         |
| 205 | rs2070895 | 15 | 58723939  | HDL.C | Large vessel disease   | 0.130965 | 0.01164 | -0.0729    | 0.0446   | LIPC  | LOC441726 | LIPC         |
| 206 | rs247617  | 16 | 56993324  | HDL.C | Large vessel disease   | 0.227319 | 0.01078 | 0.0256     | 0.0369   |       | HERPUD1   | CETP         |
| 207 | rs247617  | 16 | 56993324  | HDL.C | Cardioembolic stroke   | 0.227319 | 0.01078 | 0.0074     | 0.0345   |       | HERPUD1   | CETP         |
| 208 | rs247617  | 16 | 56993324  | HDL.C | Small vessel disease   | 0.227319 | 0.01078 | 0.0027     | 0.0382   |       | HERPUD1   | CETP         |
| 209 | rs247617  | 16 | 56990716  | HDL.C | Coronary heart disease | 0.227319 | 0.01078 | -0.030884  | 0.010212 |       | HERPUD1   | CETP         |
| 210 | rs247617  | 16 | 56993324  | HDL.C | Ischemic stroke        | 0.227319 | 0.01078 | 0.0102     | 0.0175   |       | HERPUD1   | CETP         |
| 211 | rs247617  | 16 | 56990716  | HDL.C | Myocardial infarction  | 0.227319 | 0.01078 | -0.0261377 | 0.011415 |       | HERPUD1   | CETP         |
| 212 | rs261291  | 15 | 58683366  | HDL.C | Cardioembolic stroke   | 0.128746 | 0.0102  | -0.0091    | 0.0317   |       | LOC441726 | LIPC         |
| 213 | rs261291  | 15 | 58683366  | HDL.C | Large vessel disease   | 0.128746 | 0.0102  | -0.016     | 0.0343   |       | LOC441726 | LIPC         |
| 214 | rs261291  | 15 | 58683366  | HDL.C | Ischemic stroke        | 0.128746 | 0.0102  | -0.0215    | 0.0161   |       | LOC441726 | LIPC         |
| 215 | rs261291  | 15 | 58683366  | HDL.C | Small vessel disease   | 0.128746 | 0.0102  | -0.0405    | 0.0359   |       | LOC441726 | LIPC         |
| 216 | rs261291  | 15 | 58680178  | HDL.C | Myocardial infarction  | 0.128746 | 0.0102  | 0.00516156 | 0.010716 |       | LOC441726 | LIPC         |
| 217 | rs261291  | 15 | 58680178  | HDL.C | Coronary heart disease | 0.128746 | 0.0102  | 0.012987   | 0.009619 |       | LOC441726 | LIPC         |
| 218 | rs291     | 8  | 19815852  | HDL.C | Coronary heart disease | 0.096436 | 0.01168 | -0.04804   | 0.011493 | LPL   | INTS10    | SLC18A1      |
| 219 | rs291     | 8  | 19815852  | HDL.C | Small vessel disease   | 0.096436 | 0.01168 | 0.0029     | 0.0429   | LPL   | INTS10    | SLC18A1      |
| 220 | rs291     | 8  | 19815852  | HDL.C | Myocardial infarction  | 0.096436 | 0.01168 | -0.0348685 | 0.012907 | LPL   | INTS10    | SLC18A1      |
| 221 | rs291     | 8  | 19815852  | HDL.C | Cardioembolic stroke   | 0.096436 | 0.01168 | -0.0356    | 0.0388   | LPL   | INTS10    | SLC18A1      |
| 222 | rs291     | 8  | 19815852  | HDL.C | Large vessel disease   | 0.096436 | 0.01168 | -0.0674    | 0.0414   | LPL   | INTS10    | SLC18A1      |
| 223 | rs291     | 8  | 19815852  | HDL.C | Ischemic stroke        | 0.096436 | 0.01168 | 0.002      | 0.0194   | LPL   | INTS10    | SLC18A1      |
| 224 | rs4149307 | 9  | 107589744 | HDL.C | Myocardial infarction  | 0.096471 | 0.01725 | 0.0204321  | 0.013422 | ABCA1 | NIPSNAP3B | SLC44A1      |
| 225 | rs4149307 | 9  | 107589744 | HDL.C | Coronary heart disease | 0.096471 | 0.01725 | 0.027493   | 0.011999 | ABCA1 | NIPSNAP3B | SLC44A1      |
| 226 | rs5880    | 16 | 57015091  | HDL.C | Myocardial infarction  | -0.23068 | 0.03155 | 0.0247342  | 0.0245   | CETP  | HERPUD1   | LOC100130044 |
| 227 | rs5880    | 16 | 57015091  | HDL.C | Small vessel disease   | -0.23068 | 0.03155 | -0.0283    | 0.0961   | CETP  | HERPUD1   | LOC100130044 |
| 228 | rs5880    | 16 | 57015091  | HDL.C | Ischemic stroke        | -0.23068 | 0.03155 | 0.0364     | 0.0422   | CETP  | HERPUD1   | LOC100130044 |
| 229 | rs5880    | 16 | 57015091  | HDL.C | Large vessel disease   | -0.23068 | 0.03155 | -0.0992    | 0.0884   | CETP  | HERPUD1   | LOC100130044 |
| 230 | rs5880    | 16 | 57015091  | HDL.C | Cardioembolic stroke   | -0.23068 | 0.03155 | 0.0874     | 0.0838   | CETP  | HERPUD1   | LOC100130044 |
| 231 | rs5880    | 16 | 57015091  | HDL.C | Coronary heart disease | -0.23068 | 0.03155 | 0.007277   | 0.022421 | CETP  | HERPUD1   | LOC100130044 |
| 232 | rs6065904 | 20 | 44534651  | HDL.C | Cardioembolic stroke   | -0.06627 | 0.0117  | -0.005     | 0.0387   | PLTP  | CTSA      | FLJ40606     |
| 233 | rs6065904 | 20 | 44534651  | HDL.C | Large vessel disease   | -0.06627 | 0.0117  | -0.0002    | 0.042    | PLTP  | CTSA      | FLJ40606     |
| 234 | rs6065904 | 20 | 44534651  | HDL.C | Myocardial infarction  | -0.06627 | 0.0117  | -0.0231151 | 0.01205  | PLTP  | CTSA      | FLJ40606     |

|     |             |    |           |        |                        |          |         |             |          |       |           |              |
|-----|-------------|----|-----------|--------|------------------------|----------|---------|-------------|----------|-------|-----------|--------------|
| 235 | rs6065904   | 20 | 44534651  | HDL.C  | Coronary heart disease | -0.06627 | 0.0117  | -0.019307   | 0.010831 | PLTP  | CTSA      | FLJ40606     |
| 236 | rs6065904   | 20 | 44534651  | HDL.C  | Small vessel disease   | -0.06627 | 0.0117  | 0.039       | 0.0432   | PLTP  | CTSA      | FLJ40606     |
| 237 | rs6065904   | 20 | 44534651  | HDL.C  | Ischemic stroke        | -0.06627 | 0.0117  | -0.0149     | 0.0197   | PLTP  | CTSA      | FLJ40606     |
| 238 | rs6507939   | 18 | 47176261  | HDL.C  | Myocardial infarction  | 0.092625 | 0.01346 | -0.0174663  | 0.015114 |       | LIPG      | LOC100129143 |
| 239 | rs6507939   | 18 | 47176261  | HDL.C  | Large vessel disease   | 0.092625 | 0.01346 | 0.0528      | 0.0514   |       | LIPG      | LOC100129143 |
| 240 | rs6507939   | 18 | 47176261  | HDL.C  | Cardioembolic stroke   | 0.092625 | 0.01346 | 0.0079      | 0.0479   |       | LIPG      | LOC100129143 |
| 241 | rs6507939   | 18 | 47176261  | HDL.C  | Ischemic stroke        | 0.092625 | 0.01346 | -0.0068     | 0.0237   |       | LIPG      | LOC100129143 |
| 242 | rs6507939   | 18 | 47176261  | HDL.C  | Small vessel disease   | 0.092625 | 0.01346 | -0.0005     | 0.0522   |       | LIPG      | LOC100129143 |
| 243 | rs6507939   | 18 | 47176261  | HDL.C  | Coronary heart disease | 0.092625 | 0.01346 | -0.024621   | 0.013496 |       | LIPG      | LOC100129143 |
| 244 | rs67053123  | 12 | 125380232 | HDL.C  | Ischemic stroke        | 0.080931 | 0.01455 | -0.0034     | 0.0257   |       |           |              |
| 245 | rs67053123  | 12 | 125380232 | HDL.C  | Small vessel disease   | 0.080931 | 0.01455 | 0.0385      | 0.0581   |       |           |              |
| 246 | rs67053123  | 12 | 125353810 | HDL.C  | Coronary heart disease | 0.080931 | 0.01455 | 0.008938    | 0.014264 |       |           |              |
| 247 | rs67053123  | 12 | 125353810 | HDL.C  | Myocardial infarction  | 0.080931 | 0.01455 | 0.0278404   | 0.015985 |       |           |              |
| 248 | rs67053123  | 12 | 125380232 | HDL.C  | Cardioembolic stroke   | 0.080931 | 0.01455 | 0.0483      | 0.051    |       |           |              |
| 249 | rs67053123  | 12 | 125380232 | HDL.C  | Large vessel disease   | 0.080931 | 0.01455 | -0.0563     | 0.0558   |       |           |              |
| 250 | rs75835816  | 8  | 19885513  | HDL.C  | Myocardial infarction  | -0.29237 | 0.03814 | 0.0295779   | 0.050057 |       |           |              |
| 251 | rs75835816  | 8  | 19885513  | HDL.C  | Coronary heart disease | -0.29237 | 0.03814 | 0.066618    | 0.043542 |       |           |              |
| 252 | rs113105798 | 15 | 59301460  | IDL.TG | Myocardial infarction  | 0.197768 | 0.0355  | -0.0400261  | 0.044667 |       |           |              |
| 253 | rs113105798 | 15 | 59301460  | IDL.TG | Coronary heart disease | 0.197768 | 0.0355  | -0.055219   | 0.040092 |       |           |              |
| 254 | rs113531395 | 17 | 4886829   | IDL.TG | Coronary heart disease | -0.2459  | 0.03628 | -0.046539   | 0.061719 |       |           |              |
| 255 | rs113531395 | 17 | 4886829   | IDL.TG | Myocardial infarction  | -0.2459  | 0.03628 | -0.0573797  | 0.067105 |       |           |              |
| 256 | rs115849089 | 8  | 19912370  | IDL.TG | Myocardial infarction  | -0.09785 | 0.01719 | -0.0667741  | 0.017021 |       |           |              |
| 257 | rs115849089 | 8  | 19912370  | IDL.TG | Coronary heart disease | -0.09785 | 0.01719 | -0.057989   | 0.015294 |       |           |              |
| 258 | rs11633043  | 15 | 58837722  | IDL.TG | Coronary heart disease | 0.078896 | 0.0142  | 0.009123    | 0.01474  | LIPC  | LOC441726 | ADAM10       |
| 259 | rs11633043  | 15 | 58837722  | IDL.TG | Myocardial infarction  | 0.078896 | 0.0142  | -0.00253185 | 0.016463 | LIPC  | LOC441726 | ADAM10       |
| 260 | rs1168041   | 1  | 62960250  | IDL.TG | Ischemic stroke        | 0.083815 | 0.01173 | -0.0095     | 0.0178   | DOCK7 | USP1      | ANGPTL3      |
| 261 | rs1168041   | 1  | 62960250  | IDL.TG | Coronary heart disease | 0.083815 | 0.01173 | 0.011014    | 0.01011  | DOCK7 | USP1      | ANGPTL3      |
| 262 | rs1168041   | 1  | 62960250  | IDL.TG | Large vessel disease   | 0.083815 | 0.01173 | -0.0152     | 0.0373   | DOCK7 | USP1      | ANGPTL3      |
| 263 | rs1168041   | 1  | 62960250  | IDL.TG | Small vessel disease   | 0.083815 | 0.01173 | -0.0781     | 0.0389   | DOCK7 | USP1      | ANGPTL3      |
| 264 | rs1168041   | 1  | 62960250  | IDL.TG | Myocardial infarction  | 0.083815 | 0.01173 | 0.00067632  | 0.011148 | DOCK7 | USP1      | ANGPTL3      |
| 265 | rs1168041   | 1  | 62960250  | IDL.TG | Cardioembolic stroke   | 0.083815 | 0.01173 | -0.0236     | 0.0353   | DOCK7 | USP1      | ANGPTL3      |
| 266 | rs144064722 | 4  | 73406173  | IDL.TG | Myocardial infarction  | 0.24965  | 0.03404 | 0.032534    | 0.034056 |       |           |              |
| 267 | rs144064722 | 4  | 73406173  | IDL.TG | Coronary heart disease | 0.24965  | 0.03404 | 0.028313    | 0.031588 |       |           |              |
| 268 | rs146842281 | 15 | 59356659  | IDL.TG | Myocardial infarction  | 0.145519 | 0.02193 | 0.0331942   | 0.039409 |       |           |              |
| 269 | rs146842281 | 15 | 59356659  | IDL.TG | Coronary heart disease | 0.145519 | 0.02193 | 0.025121    | 0.033363 |       |           |              |
| 270 | rs1532085   | 15 | 58683366  | IDL.TG | Myocardial infarction  | -0.15608 | 0.01048 | -0.00988838 | 0.010417 |       | LOC441726 | LIPC         |
| 271 | rs1532085   | 15 | 58683366  | IDL.TG | Cardioembolic stroke   | -0.15608 | 0.01048 | 0.0091      | 0.0317   |       | LOC441726 | LIPC         |
| 272 | rs1532085   | 15 | 58683366  | IDL.TG | Ischemic stroke        | -0.15608 | 0.01048 | 0.0215      | 0.0161   |       | LOC441726 | LIPC         |
| 273 | rs1532085   | 15 | 58683366  | IDL.TG | Small vessel disease   | -0.15608 | 0.01048 | 0.0405      | 0.0359   |       | LOC441726 | LIPC         |
| 274 | rs1532085   | 15 | 58683366  | IDL.TG | Coronary heart disease | -0.15608 | 0.01048 | -0.01812    | 0.009354 |       | LOC441726 | LIPC         |
| 275 | rs1532085   | 15 | 58683366  | IDL.TG | Large vessel disease   | -0.15608 | 0.01048 | 0.016       | 0.0343   |       | LOC441726 | LIPC         |



|     |            |    |          |        |                        |          |         |            |          |              |              |              |
|-----|------------|----|----------|--------|------------------------|----------|---------|------------|----------|--------------|--------------|--------------|
| 276 | rs157594   | 19 | 45425175 | IDL.TG | Coronary heart disease | 0.125692 | 0.01172 | 0.021906   | 0.011888 | LOC100129500 | APOC1        | APOC4        |
| 277 | rs157594   | 19 | 45425175 | IDL.TG | Myocardial infarction  | 0.125692 | 0.01172 | 0.0265114  | 0.013237 | LOC100129500 | APOC1        | APOC4        |
| 278 | rs1883711  | 20 | 39179822 | IDL.TG | Coronary heart disease | 0.154938 | 0.02472 | 0.133601   | 0.034913 |              | HSPEP1       | MAFB         |
| 279 | rs1883711  | 20 | 39179822 | IDL.TG | Myocardial infarction  | 0.154938 | 0.02472 | 0.0985739  | 0.040277 |              | HSPEP1       | MAFB         |
| 280 | rs1883711  | 20 | 39179822 | IDL.TG | Cardioembolic stroke   | 0.154938 | 0.02472 | 0.178      | 0.205    |              | HSPEP1       | MAFB         |
| 281 | rs247617   | 16 | 56993324 | IDL.TG | Cardioembolic stroke   | -0.08426 | 0.01147 | 0.0074     | 0.0345   |              | HERPUD1      | CETP         |
| 282 | rs247617   | 16 | 56993324 | IDL.TG | Small vessel disease   | -0.08426 | 0.01147 | 0.0027     | 0.0382   |              | HERPUD1      | CETP         |
| 283 | rs247617   | 16 | 56990716 | IDL.TG | Myocardial infarction  | -0.08426 | 0.01147 | -0.0261377 | 0.011415 |              | HERPUD1      | CETP         |
| 284 | rs247617   | 16 | 56990716 | IDL.TG | Coronary heart disease | -0.08426 | 0.01147 | -0.030884  | 0.010212 |              | HERPUD1      | CETP         |
| 285 | rs247617   | 16 | 56993324 | IDL.TG | Large vessel disease   | -0.08426 | 0.01147 | 0.0256     | 0.0369   |              | HERPUD1      | CETP         |
| 286 | rs247617   | 16 | 56993324 | IDL.TG | Ischemic stroke        | -0.08426 | 0.01147 | 0.0102     | 0.0175   |              | HERPUD1      | CETP         |
| 287 | rs261334   | 15 | 58726744 | IDL.TG | Cardioembolic stroke   | -0.19736 | 0.01226 | 0.0623     | 0.0423   | LIPC         | LOC441726    | ADAM10       |
| 288 | rs261334   | 15 | 58726744 | IDL.TG | Ischemic stroke        | -0.19736 | 0.01226 | 0.0383     | 0.0211   | LIPC         | LOC441726    | ADAM10       |
| 289 | rs261334   | 15 | 58726744 | IDL.TG | Large vessel disease   | -0.19736 | 0.01226 | 0.0677     | 0.0452   | LIPC         | LOC441726    | ADAM10       |
| 290 | rs261334   | 15 | 58726744 | IDL.TG | Coronary heart disease | -0.19736 | 0.01226 | -0.03756   | 0.011043 | LIPC         | LOC441726    | ADAM10       |
| 291 | rs261334   | 15 | 58726744 | IDL.TG | Myocardial infarction  | -0.19736 | 0.01226 | -0.0402744 | 0.012395 | LIPC         | LOC441726    | ADAM10       |
| 292 | rs261334   | 15 | 58726744 | IDL.TG | Small vessel disease   | -0.19736 | 0.01226 | -0.0739    | 0.0451   | LIPC         | LOC441726    | ADAM10       |
| 293 | rs312030   | 2  | 21462743 | IDL.TG | Myocardial infarction  | 0.11074  | 0.01814 | -0.0151187 | 0.021444 |              | LOC100129278 | LOC645949    |
| 294 | rs312030   | 2  | 21462743 | IDL.TG | Coronary heart disease | 0.11074  | 0.01814 | 0.007792   | 0.019535 |              | LOC100129278 | LOC645949    |
| 295 | rs34722314 | 2  | 21303470 | IDL.TG | Large vessel disease   | -0.12461 | 0.01498 | 0.0482     | 0.05     |              | APOB         | LOC100129278 |
| 296 | rs34722314 | 2  | 21271707 | IDL.TG | Myocardial infarction  | -0.12461 | 0.01498 | -0.0465062 | 0.015487 |              | APOB         | LOC100129278 |
| 297 | rs34722314 | 2  | 21303470 | IDL.TG | Ischemic stroke        | -0.12461 | 0.01498 | 0.0079     | 0.024    |              | APOB         | LOC100129278 |
| 298 | rs34722314 | 2  | 21303470 | IDL.TG | Cardioembolic stroke   | -0.12461 | 0.01498 | 0.035      | 0.0475   |              | APOB         | LOC100129278 |
| 299 | rs34722314 | 2  | 21303470 | IDL.TG | Small vessel disease   | -0.12461 | 0.01498 | 0.0056     | 0.0525   |              | APOB         | LOC100129278 |
| 300 | rs34722314 | 2  | 21271707 | IDL.TG | Coronary heart disease | -0.12461 | 0.01498 | -0.06419   | 0.014243 |              | APOB         | LOC100129278 |
| 301 | rs4075673  | 2  | 21150787 | IDL.TG | Myocardial infarction  | -0.10248 | 0.01048 | -0.0115867 | 0.010676 |              |              |              |
| 302 | rs4075673  | 2  | 21150787 | IDL.TG | Coronary heart disease | -0.10248 | 0.01048 | -0.013347  | 0.009722 |              |              |              |
| 303 | rs4609471  | 1  | 55493584 | IDL.TG | Coronary heart disease | -0.25447 | 0.02976 | -0.088176  | 0.037828 |              | BSND         | PCSK9        |
| 304 | rs4609471  | 1  | 55493584 | IDL.TG | Myocardial infarction  | -0.25447 | 0.02976 | -0.110147  | 0.042779 |              | BSND         | PCSK9        |
| 305 | rs55966152 | 15 | 58561006 | IDL.TG | Myocardial infarction  | -0.09174 | 0.01607 | -0.0291511 | 0.013851 |              | LOC441726    | LIPC         |
| 306 | rs55966152 | 15 | 58561006 | IDL.TG | Coronary heart disease | -0.09174 | 0.01607 | -0.022246  | 0.012545 |              | LOC441726    | LIPC         |
| 307 | rs58542926 | 19 | 19610596 | IDL.TG | Cardioembolic stroke   | -0.14101 | 0.02107 | 0.1322     | 0.0595   | TM6SF2       | HAPLN4       | SF4          |
| 308 | rs58542926 | 19 | 19610596 | IDL.TG | Ischemic stroke        | -0.14101 | 0.02107 | 0.0224     | 0.0304   | TM6SF2       | HAPLN4       | SF4          |
| 309 | rs58542926 | 19 | 19379549 | IDL.TG | Coronary heart disease | -0.14101 | 0.02107 | -0.051253  | 0.018343 | TM6SF2       | HAPLN4       | SF4          |
| 310 | rs58542926 | 19 | 19610596 | IDL.TG | Large vessel disease   | -0.14101 | 0.02107 | 0.0518     | 0.0641   | TM6SF2       | HAPLN4       | SF4          |
| 311 | rs58542926 | 19 | 19610596 | IDL.TG | Small vessel disease   | -0.14101 | 0.02107 | 0.0136     | 0.0675   | TM6SF2       | HAPLN4       | SF4          |
| 312 | rs58542926 | 19 | 19379549 | IDL.TG | Myocardial infarction  | -0.14101 | 0.02107 | -0.0459691 | 0.020412 | TM6SF2       | HAPLN4       | SF4          |
|     |            |    |          |        |                        |          |         |            |          | ALDH1A2      |              |              |
| 313 | rs61999891 | 15 | 58299599 | IDL.TG | Coronary heart disease | 0.102936 | 0.01736 | -0.022129  | 0.015103 | ALDH1A2      | LOC100132719 | AQP9         |
|     |            |    |          |        |                        |          |         |            |          | ALDH1A2      |              |              |
| 314 | rs61999891 | 15 | 58299599 | IDL.TG | Myocardial infarction  | 0.102936 | 0.01736 | 0.00774116 | 0.016926 | ALDH1A2      | LOC100132719 | AQP9         |

|     |            |    |           |           |                        |          |         |            |          |              |         |        |
|-----|------------|----|-----------|-----------|------------------------|----------|---------|------------|----------|--------------|---------|--------|
| 315 | rs6511720  | 19 | 11202306  | IDL.TG    | Ischemic stroke        | -0.17567 | 0.01733 | -0.0708    | 0.0249   | LDLR         | SMARCA4 | SPC24  |
| 316 | rs6511720  | 19 | 11202306  | IDL.TG    | Large vessel disease   | -0.17567 | 0.01733 | -0.0924    | 0.0525   | LDLR         | SMARCA4 | SPC24  |
| 317 | rs6511720  | 19 | 11202306  | IDL.TG    | Myocardial infarction  | -0.17567 | 0.01733 | -0.100786  | 0.01894  | LDLR         | SMARCA4 | SPC24  |
| 318 | rs6511720  | 19 | 11202306  | IDL.TG    | Coronary heart disease | -0.17567 | 0.01733 | -0.125298  | 0.016945 | LDLR         | SMARCA4 | SPC24  |
| 319 | rs6511720  | 19 | 11202306  | IDL.TG    | Cardioembolic stroke   | -0.17567 | 0.01733 | -0.0567    | 0.048    | LDLR         | SMARCA4 | SPC24  |
| 320 | rs6511720  | 19 | 11202306  | IDL.TG    | Small vessel disease   | -0.17567 | 0.01733 | -0.013     | 0.0549   | LDLR         | SMARCA4 | SPC24  |
| 321 | rs660240   | 1  | 109817838 | IDL.TG    | Cardioembolic stroke   | 0.078525 | 0.01248 | 0.0225     | 0.0383   | CELSR2       | SARS    | PSRC1  |
| 322 | rs660240   | 1  | 109817838 | IDL.TG    | Ischemic stroke        | 0.078525 | 0.01248 | -0.0067    | 0.0194   | CELSR2       | SARS    | PSRC1  |
| 323 | rs660240   | 1  | 109817838 | IDL.TG    | Myocardial infarction  | 0.078525 | 0.01248 | 0.0881729  | 0.012683 | CELSR2       | SARS    | PSRC1  |
| 324 | rs660240   | 1  | 109817838 | IDL.TG    | Coronary heart disease | 0.078525 | 0.01248 | 0.102043   | 0.011529 | CELSR2       | SARS    | PSRC1  |
| 325 | rs660240   | 1  | 109817838 | IDL.TG    | Large vessel disease   | 0.078525 | 0.01248 | 0.0982     | 0.042    | CELSR2       | SARS    | PSRC1  |
| 326 | rs660240   | 1  | 109817838 | IDL.TG    | Small vessel disease   | 0.078525 | 0.01248 | -0.0169    | 0.0426   | CELSR2       | SARS    | PSRC1  |
| 327 | rs72660594 | 1  | 55636240  | IDL.TG    | Coronary heart disease | -0.27171 | 0.02881 | -0.080262  | 0.046373 |              |         |        |
| 328 | rs72660594 | 1  | 55636240  | IDL.TG    | Myocardial infarction  | -0.27171 | 0.02881 | -0.0986201 | 0.051013 |              |         |        |
|     |            |    |           |           |                        |          |         |            |          | APOE         |         |        |
|     |            |    |           |           |                        |          |         |            |          | LOC100129500 |         |        |
| 329 | rs7412     | 19 | 45412079  | IDL.TG    | Myocardial infarction  | -0.26322 | 0.02608 | -0.122218  | 0.023946 | LOC100129500 | TOMM40  | APOC1  |
|     |            |    |           |           |                        |          |         |            |          | APOE         |         |        |
|     |            |    |           |           |                        |          |         |            |          | LOC100129500 |         |        |
| 330 | rs7412     | 19 | 45412079  | IDL.TG    | Coronary heart disease | -0.26322 | 0.02608 | -0.137045  | 0.021092 | LOC100129500 | TOMM40  | APOC1  |
| 331 | rs75679663 | 17 | 4667972   | IDL.TG    | Coronary heart disease | -0.22281 | 0.03874 | -0.011031  | 0.066703 |              |         |        |
| 332 | rs75679663 | 17 | 4667972   | IDL.TG    | Myocardial infarction  | -0.22281 | 0.03874 | 0.0280457  | 0.073714 |              |         |        |
| 333 | rs79225634 | 5  | 74619639  | IDL.TG    | Coronary heart disease | 0.062054 | 0.01082 | 0.024313   | 0.009685 |              |         |        |
| 334 | rs79225634 | 5  | 74619639  | IDL.TG    | Myocardial infarction  | 0.062054 | 0.01082 | 0.0202878  | 0.010617 |              |         |        |
| 335 | rs9302635  | 16 | 72144174  | IDL.TG    | Myocardial infarction  | -0.0778  | 0.01347 | -0.0166367 | 0.014983 | DHX38        | TXNL4B  | PMFBP1 |
| 336 | rs9302635  | 16 | 72144174  | IDL.TG    | Ischemic stroke        | -0.0778  | 0.01347 | -0.0059    | 0.0221   | DHX38        | TXNL4B  | PMFBP1 |
| 337 | rs9302635  | 16 | 72144174  | IDL.TG    | Coronary heart disease | -0.0778  | 0.01347 | -0.007167  | 0.013264 | DHX38        | TXNL4B  | PMFBP1 |
| 338 | rs9302635  | 16 | 72144174  | IDL.TG    | Large vessel disease   | -0.0778  | 0.01347 | -0.01      | 0.0464   | DHX38        | TXNL4B  | PMFBP1 |
| 339 | rs9302635  | 16 | 72144174  | IDL.TG    | Cardioembolic stroke   | -0.0778  | 0.01347 | -0.038     | 0.0446   | DHX38        | TXNL4B  | PMFBP1 |
| 340 | rs9302635  | 16 | 72144174  | IDL.TG    | Small vessel disease   | -0.0778  | 0.01347 | 0.0143     | 0.0489   | DHX38        | TXNL4B  | PMFBP1 |
| 341 | rs964184   | 11 | 116648917 | IDL.TG    | Cardioembolic stroke   | -0.14886 | 0.01457 | -0.0127    | 0.0464   | ZNF259       | BUD13   | ZNF259 |
| 342 | rs964184   | 11 | 116648917 | IDL.TG    | Coronary heart disease | -0.14886 | 0.01457 | -0.049958  | 0.012399 | ZNF259       | BUD13   | ZNF259 |
| 343 | rs964184   | 11 | 116648917 | IDL.TG    | Ischemic stroke        | -0.14886 | 0.01457 | -0.0074    | 0.024    | ZNF259       | BUD13   | ZNF259 |
| 344 | rs964184   | 11 | 116648917 | IDL.TG    | Small vessel disease   | -0.14886 | 0.01457 | -0.0253    | 0.0533   | ZNF259       | BUD13   | ZNF259 |
| 345 | rs964184   | 11 | 116648917 | IDL.TG    | Large vessel disease   | -0.14886 | 0.01457 | -0.0184    | 0.0505   | ZNF259       | BUD13   | ZNF259 |
| 346 | rs964184   | 11 | 116648917 | IDL.TG    | Myocardial infarction  | -0.14886 | 0.01457 | -0.0487708 | 0.013873 | ZNF259       | BUD13   | ZNF259 |
| 347 | rs10455872 | 6  | 161010118 | L.VLDL.TG | Cardioembolic stroke   | -0.16521 | 0.02808 | 0.0167     | 0.0957   | LPA          | LPAL2   | PLG    |
| 348 | rs10455872 | 6  | 161010118 | L.VLDL.TG | Small vessel disease   | -0.16521 | 0.02808 | -0.0807    | 0.1015   | LPA          | LPAL2   | PLG    |
| 349 | rs10455872 | 6  | 161010118 | L.VLDL.TG | Coronary heart disease | -0.16521 | 0.02808 | 0.318598   | 0.024399 | LPA          | LPAL2   | PLG    |
| 350 | rs10455872 | 6  | 161010118 | L.VLDL.TG | Large vessel disease   | -0.16521 | 0.02808 | 0.227      | 0.0906   | LPA          | LPAL2   | PLG    |
| 351 | rs10455872 | 6  | 161010118 | L.VLDL.TG | Myocardial infarction  | -0.16521 | 0.02808 | 0.284774   | 0.026592 | LPA          | LPAL2   | PLG    |

|     |            |    |           |           |                        |          |         |             |          |              |       |              |
|-----|------------|----|-----------|-----------|------------------------|----------|---------|-------------|----------|--------------|-------|--------------|
| 352 | rs10455872 | 6  | 161010118 | L.VLDL.TG | Ischemic stroke        | -0.16521 | 0.02808 | 0.0418      | 0.045    | LPA          | LPAL2 | PLG          |
| 353 | rs1260326  | 2  | 27730940  | L.VLDL.TG | Small vessel disease   | -0.09421 | 0.01028 | -0.0441     | 0.0353   | GCKR         | FNDC4 | LOC100130981 |
| 354 | rs1260326  | 2  | 27730940  | L.VLDL.TG | Coronary heart disease | -0.09421 | 0.01028 | 0.003257    | 0.00962  | GCKR         | FNDC4 | LOC100130981 |
| 355 | rs1260326  | 2  | 27730940  | L.VLDL.TG | Cardioembolic stroke   | -0.09421 | 0.01028 | 0.0401      | 0.0314   | GCKR         | FNDC4 | LOC100130981 |
| 356 | rs1260326  | 2  | 27730940  | L.VLDL.TG | Ischemic stroke        | -0.09421 | 0.01028 | 0.012       | 0.0162   | GCKR         | FNDC4 | LOC100130981 |
| 357 | rs1260326  | 2  | 27730940  | L.VLDL.TG | Large vessel disease   | -0.09421 | 0.01028 | 0.0392      | 0.0341   | GCKR         | FNDC4 | LOC100130981 |
| 358 | rs1260326  | 2  | 27730940  | L.VLDL.TG | Myocardial infarction  | -0.09421 | 0.01028 | 0.00111651  | 0.010666 | GCKR         | FNDC4 | LOC100130981 |
|     |            |    |           |           |                        |          |         |             |          | MLXIPL       |       |              |
|     |            |    |           |           |                        |          |         |             |          | MLXIPL       |       |              |
| 359 | rs34346326 | 7  | 73016181  | L.VLDL.TG | Myocardial infarction  | -0.1103  | 0.01316 | -0.00956639 | 0.014338 | MLXIPL       | TBL2  | VPS37D       |
|     |            |    |           |           |                        |          |         |             |          | MLXIPL       |       |              |
|     |            |    |           |           |                        |          |         |             |          | MLXIPL       |       |              |
| 360 | rs34346326 | 7  | 73016181  | L.VLDL.TG | Coronary heart disease | -0.1103  | 0.01316 | -0.010364   | 0.012808 | MLXIPL       | TBL2  | VPS37D       |
| 361 | rs4350231  | 1  | 62922660  | L.VLDL.TG | Ischemic stroke        | -0.07104 | 0.01074 | 0.018       | 0.017    | DOCK7        | USP1  | ANGPTL3      |
| 362 | rs4350231  | 1  | 62922660  | L.VLDL.TG | Cardioembolic stroke   | -0.07104 | 0.01074 | 0.027       | 0.0336   | DOCK7        | USP1  | ANGPTL3      |
| 363 | rs4350231  | 1  | 62922660  | L.VLDL.TG | Large vessel disease   | -0.07104 | 0.01074 | 0.0145      | 0.0361   | DOCK7        | USP1  | ANGPTL3      |
| 364 | rs4350231  | 1  | 62922660  | L.VLDL.TG | Small vessel disease   | -0.07104 | 0.01074 | 0.0809      | 0.0375   | DOCK7        | USP1  | ANGPTL3      |
| 365 | rs4350231  | 1  | 62922660  | L.VLDL.TG | Coronary heart disease | -0.07104 | 0.01074 | -0.01175    | 0.00975  | DOCK7        | USP1  | ANGPTL3      |
| 366 | rs4350231  | 1  | 62922660  | L.VLDL.TG | Myocardial infarction  | -0.07104 | 0.01074 | -0.00466521 | 0.010839 | DOCK7        | USP1  | ANGPTL3      |
| 367 | rs438811   | 19 | 45416741  | L.VLDL.TG | Myocardial infarction  | 0.089567 | 0.01217 | 0.0249193   | 0.014388 | LOC100129500 | APOE  | APOC1        |
| 368 | rs438811   | 19 | 45416741  | L.VLDL.TG | Coronary heart disease | 0.089567 | 0.01217 | 0.013252    | 0.012834 | LOC100129500 | APOE  | APOC1        |
| 369 | rs72999033 | 19 | 19407718  | L.VLDL.TG | Small vessel disease   | -0.13285 | 0.02114 | 0.0398      | 0.0744   |              |       |              |
| 370 | rs72999033 | 19 | 19407718  | L.VLDL.TG | Ischemic stroke        | -0.13285 | 0.02114 | 0.0212      | 0.0335   |              |       |              |
| 371 | rs72999033 | 19 | 19366632  | L.VLDL.TG | Myocardial infarction  | -0.13285 | 0.02114 | -0.0370382  | 0.023873 |              |       |              |
| 372 | rs72999033 | 19 | 19407718  | L.VLDL.TG | Cardioembolic stroke   | -0.13285 | 0.02114 | 0.0972      | 0.0645   |              |       |              |
| 373 | rs72999033 | 19 | 19366632  | L.VLDL.TG | Coronary heart disease | -0.13285 | 0.02114 | -0.051959   | 0.021377 |              |       |              |
| 374 | rs72999033 | 19 | 19407718  | L.VLDL.TG | Large vessel disease   | -0.13285 | 0.02114 | 0.1255      | 0.0702   |              |       |              |
| 375 | rs76975037 | 8  | 19851508  | L.VLDL.TG | Myocardial infarction  | -0.15445 | 0.01786 | -0.0665203  | 0.017954 |              |       |              |
| 376 | rs76975037 | 8  | 19852134  | L.VLDL.TG | Cardioembolic stroke   | -0.15445 | 0.01786 | 0.0885      | 0.0497   |              |       |              |
| 377 | rs76975037 | 8  | 19852134  | L.VLDL.TG | Ischemic stroke        | -0.15445 | 0.01786 | 0.0376      | 0.0262   |              |       |              |
| 378 | rs76975037 | 8  | 19851508  | L.VLDL.TG | Coronary heart disease | -0.15445 | 0.01786 | -0.053571   | 0.016022 |              |       |              |
| 379 | rs76975037 | 8  | 19852134  | L.VLDL.TG | Small vessel disease   | -0.15445 | 0.01786 | 0.0289      | 0.0596   |              |       |              |
| 380 | rs76975037 | 8  | 19852134  | L.VLDL.TG | Large vessel disease   | -0.15445 | 0.01786 | 0.0167      | 0.0536   |              |       |              |
| 381 | rs9472125  | 6  | 43756169  | L.VLDL.TG | Myocardial infarction  | -0.09079 | 0.01626 | -0.0503078  | 0.021507 |              | VEGFA | LOC100132354 |
| 382 | rs9472125  | 6  | 43756169  | L.VLDL.TG | Coronary heart disease | -0.09079 | 0.01626 | -0.054856   | 0.019233 |              | VEGFA | LOC100132354 |
| 383 | rs964184   | 11 | 116648917 | L.VLDL.TG | Cardioembolic stroke   | -0.20631 | 0.01408 | -0.0127     | 0.0464   | ZNF259       | BUD13 | ZNF259       |
| 384 | rs964184   | 11 | 116648917 | L.VLDL.TG | Myocardial infarction  | -0.20631 | 0.01408 | -0.0487708  | 0.013873 | ZNF259       | BUD13 | ZNF259       |
| 385 | rs964184   | 11 | 116648917 | L.VLDL.TG | Ischemic stroke        | -0.20631 | 0.01408 | -0.0074     | 0.024    | ZNF259       | BUD13 | ZNF259       |
| 386 | rs964184   | 11 | 116648917 | L.VLDL.TG | Coronary heart disease | -0.20631 | 0.01408 | -0.049958   | 0.012399 | ZNF259       | BUD13 | ZNF259       |
| 387 | rs964184   | 11 | 116648917 | L.VLDL.TG | Small vessel disease   | -0.20631 | 0.01408 | -0.0253     | 0.0533   | ZNF259       | BUD13 | ZNF259       |
| 388 | rs964184   | 11 | 116648917 | L.VLDL.TG | Large vessel disease   | -0.20631 | 0.01408 | -0.0184     | 0.0505   | ZNF259       | BUD13 | ZNF259       |

|     |             |    |          |       |                        |          |         |            |          |         |              |              |
|-----|-------------|----|----------|-------|------------------------|----------|---------|------------|----------|---------|--------------|--------------|
| 389 | rs10056811  | 5  | 74605220 | LDL.C | Cardioembolic stroke   | 0.08841  | 0.01036 | -0.023     | 0.0348   |         | ANKRD31      | LOC728775    |
| 390 | rs10056811  | 5  | 74605220 | LDL.C | Small vessel disease   | 0.08841  | 0.01036 | 0.0149     | 0.0382   |         | ANKRD31      | LOC728775    |
| 391 | rs10056811  | 5  | 74605220 | LDL.C | Ischemic stroke        | 0.08841  | 0.01036 | -0.0082    | 0.0176   |         | ANKRD31      | LOC728775    |
| 392 | rs10056811  | 5  | 74605220 | LDL.C | Large vessel disease   | 0.08841  | 0.01036 | -0.0701    | 0.038    |         | ANKRD31      | LOC728775    |
| 393 | rs10056811  | 5  | 74605220 | LDL.C | Myocardial infarction  | 0.08841  | 0.01036 | 0.0221538  | 0.010655 |         | ANKRD31      | LOC728775    |
| 394 | rs10056811  | 5  | 74605220 | LDL.C | Coronary heart disease | 0.08841  | 0.01036 | 0.025525   | 0.009749 |         | ANKRD31      | LOC728775    |
| 395 | rs1081105   | 19 | 45412955 | LDL.C | Myocardial infarction  | 0.232041 | 0.03866 | 0.142826   | 0.048309 | APOE    | APOE         | APOC1        |
| 396 | rs1081105   | 19 | 45412955 | LDL.C | Coronary heart disease | 0.232041 | 0.03866 | 0.086187   | 0.041158 | APOE    | APOE         | APOC1        |
| 397 | rs112635299 | 14 | 94838142 | LDL.C | Myocardial infarction  | 0.232048 | 0.03966 | -0.16874   | 0.054411 |         |              |              |
| 398 | rs112635299 | 14 | 94838142 | LDL.C | Coronary heart disease | 0.232048 | 0.03966 | -0.168269  | 0.047485 |         |              |              |
| 399 | rs11591147  | 1  | 55505647 | LDL.C | Myocardial infarction  | -0.51524 | 0.03472 | -0.354653  | 0.068555 | PCSK9   | BSND         | USP24        |
| 400 | rs11591147  | 1  | 55505647 | LDL.C | Coronary heart disease | -0.51524 | 0.03472 | -0.256502  | 0.057259 | PCSK9   | BSND         | USP24        |
| 401 | rs11878174  | 19 | 45723379 | LDL.C | Coronary heart disease | 0.075095 | 0.01166 | 0.028498   | 0.01273  | EXOC3L2 | BLOC1S3      | LOC100132177 |
| 402 | rs11878174  | 19 | 45723379 | LDL.C | Myocardial infarction  | 0.075095 | 0.01166 | 0.0201506  | 0.014108 | EXOC3L2 | BLOC1S3      | LOC100132177 |
| 403 | rs12029058  | 1  | 55719042 | LDL.C | Small vessel disease   | -0.06599 | 0.01154 | -0.0854    | 0.0518   |         | LOC645506    | GOT2L1       |
| 404 | rs12029058  | 1  | 55719042 | LDL.C | Ischemic stroke        | -0.06599 | 0.01154 | -0.0243    | 0.0232   |         | LOC645506    | GOT2L1       |
| 405 | rs12029058  | 1  | 55717274 | LDL.C | Myocardial infarction  | -0.06599 | 0.01154 | -0.027904  | 0.013167 |         | LOC645506    | GOT2L1       |
| 406 | rs12029058  | 1  | 55717274 | LDL.C | Coronary heart disease | -0.06599 | 0.01154 | -0.028159  | 0.011885 |         | LOC645506    | GOT2L1       |
| 407 | rs12029058  | 1  | 55719042 | LDL.C | Cardioembolic stroke   | -0.06599 | 0.01154 | -0.0152    | 0.0455   |         | LOC645506    | GOT2L1       |
| 408 | rs12029058  | 1  | 55719042 | LDL.C | Large vessel disease   | -0.06599 | 0.01154 | -0.0199    | 0.0493   |         | LOC645506    | GOT2L1       |
| 409 | rs142130958 | 19 | 11202306 | LDL.C | Cardioembolic stroke   | -0.23071 | 0.01633 | -0.0567    | 0.048    |         |              |              |
| 410 | rs142130958 | 19 | 11202306 | LDL.C | Small vessel disease   | -0.23071 | 0.01633 | -0.013     | 0.0549   |         |              |              |
| 411 | rs142130958 | 19 | 11202306 | LDL.C | Large vessel disease   | -0.23071 | 0.01633 | -0.0924    | 0.0525   |         |              |              |
| 412 | rs142130958 | 19 | 11190652 | LDL.C | Myocardial infarction  | -0.23071 | 0.01633 | -0.100247  | 0.018695 |         |              |              |
| 413 | rs142130958 | 19 | 11190652 | LDL.C | Coronary heart disease | -0.23071 | 0.01633 | -0.125647  | 0.016786 |         |              |              |
| 414 | rs142130958 | 19 | 11202306 | LDL.C | Ischemic stroke        | -0.23071 | 0.01633 | -0.0708    | 0.0249   |         |              |              |
| 415 | rs143341434 | 1  | 54759547 | LDL.C | Myocardial infarction  | -0.2658  | 0.02841 | -0.0393462 | 0.060482 |         |              |              |
| 416 | rs143341434 | 1  | 54759547 | LDL.C | Coronary heart disease | -0.2658  | 0.02841 | -0.016655  | 0.053934 |         |              |              |
| 417 | rs144064722 | 4  | 73406173 | LDL.C | Myocardial infarction  | 0.241631 | 0.03401 | 0.032534   | 0.034056 |         |              |              |
| 418 | rs144064722 | 4  | 73406173 | LDL.C | Coronary heart disease | 0.241631 | 0.03401 | 0.028313   | 0.031588 |         |              |              |
| 419 | rs1712249   | 2  | 21385974 | LDL.C | Coronary heart disease | 0.062156 | 0.01114 | 0.039574   | 0.011268 |         | LOC100129278 | LOC645949    |
| 420 | rs1712249   | 2  | 21386957 | LDL.C | Ischemic stroke        | 0.062156 | 0.01114 | 0.0049     | 0.0209   |         | LOC100129278 | LOC645949    |
| 421 | rs1712249   | 2  | 21386957 | LDL.C | Large vessel disease   | 0.062156 | 0.01114 | -0.0275    | 0.0441   |         | LOC100129278 | LOC645949    |
| 422 | rs1712249   | 2  | 21386957 | LDL.C | Cardioembolic stroke   | 0.062156 | 0.01114 | 0.004      | 0.0415   |         | LOC100129278 | LOC645949    |
| 423 | rs1712249   | 2  | 21385974 | LDL.C | Myocardial infarction  | 0.062156 | 0.01114 | 0.0313648  | 0.012366 |         | LOC100129278 | LOC645949    |
| 424 | rs1712249   | 2  | 21386957 | LDL.C | Small vessel disease   | 0.062156 | 0.01114 | -0.0023    | 0.0462   |         | LOC100129278 | LOC645949    |
| 425 | rs17395160  | 1  | 55085141 | LDL.C | Coronary heart disease | -0.08501 | 0.01207 | -0.012783  | 0.011336 | FAM151A | LOC645436    | C1orf175     |
| 426 | rs17395160  | 1  | 55085141 | LDL.C | Myocardial infarction  | -0.08501 | 0.01207 | -0.013664  | 0.01264  | FAM151A | LOC645436    | C1orf175     |
| 427 | rs17395160  | 1  | 55085141 | LDL.C | Large vessel disease   | -0.08501 | 0.01207 | -0.1123    | 0.0423   | FAM151A | LOC645436    | C1orf175     |
| 428 | rs17395160  | 1  | 55085141 | LDL.C | Small vessel disease   | -0.08501 | 0.01207 | -0.053     | 0.0447   | FAM151A | LOC645436    | C1orf175     |
| 429 | rs17395160  | 1  | 55085141 | LDL.C | Cardioembolic stroke   | -0.08501 | 0.01207 | -0.0181    | 0.0396   | FAM151A | LOC645436    | C1orf175     |

|     |             |    |           |       |                        |          |         |             |          |             |           |          |
|-----|-------------|----|-----------|-------|------------------------|----------|---------|-------------|----------|-------------|-----------|----------|
| 430 | rs17395160  | 1  | 55085141  | LDL.C | Ischemic stroke        | -0.08501 | 0.01207 | -0.0578     | 0.0207   | FAM151A     | LOC645436 | C1orf175 |
| 431 | rs185415345 | 1  | 56625395  | LDL.C | Myocardial infarction  | -0.16811 | 0.02727 | -0.0279401  | 0.04292  |             |           |          |
| 432 | rs185415345 | 1  | 56625395  | LDL.C | Coronary heart disease | -0.16811 | 0.02727 | -0.016587   | 0.037988 |             |           |          |
| 433 | rs193084249 | 1  | 26987646  | LDL.C | Coronary heart disease | 0.180124 | 0.03124 | 0.06489     | 0.040959 |             |           |          |
| 434 | rs193084249 | 1  | 26987646  | LDL.C | Myocardial infarction  | 0.180124 | 0.03124 | 0.0372222   | 0.045195 |             |           |          |
| 435 | rs1962352   | 19 | 11236180  | LDL.C | Small vessel disease   | 0.065621 | 0.00993 | 0.0852      | 0.0373   | LDLR        | SMARCA4   | SPC24    |
| 436 | rs1962352   | 19 | 11236180  | LDL.C | Ischemic stroke        | 0.065621 | 0.00993 | 0.054       | 0.017    | LDLR        | SMARCA4   | SPC24    |
| 437 | rs1962352   | 19 | 11236180  | LDL.C | Large vessel disease   | 0.065621 | 0.00993 | 0.0806      | 0.0363   | LDLR        | SMARCA4   | SPC24    |
| 438 | rs1962352   | 19 | 11226543  | LDL.C | Coronary heart disease | 0.065621 | 0.00993 | 0.035179    | 0.009641 | LDLR        | SMARCA4   | SPC24    |
| 439 | rs1962352   | 19 | 11226543  | LDL.C | Myocardial infarction  | 0.065621 | 0.00993 | 0.0450183   | 0.010589 | LDLR        | SMARCA4   | SPC24    |
| 440 | rs1962352   | 19 | 11236180  | LDL.C | Cardioembolic stroke   | 0.065621 | 0.00993 | 0.0327      | 0.0342   | LDLR        | SMARCA4   | SPC24    |
| 441 | rs207177    | 1  | 55790861  | LDL.C | Small vessel disease   | 0.132501 | 0.01706 | -0.0774     | 0.0599   |             | LOC645506 | GOT2L1   |
| 442 | rs207177    | 1  | 55790861  | LDL.C | Large vessel disease   | 0.132501 | 0.01706 | -0.0321     | 0.0575   |             | LOC645506 | GOT2L1   |
| 443 | rs207177    | 1  | 55790861  | LDL.C | Ischemic stroke        | 0.132501 | 0.01706 | 0.001       | 0.0271   |             | LOC645506 | GOT2L1   |
| 444 | rs207177    | 1  | 55790861  | LDL.C | Cardioembolic stroke   | 0.132501 | 0.01706 | -0.025      | 0.0537   |             | LOC645506 | GOT2L1   |
| 445 | rs207177    | 1  | 55790336  | LDL.C | Myocardial infarction  | 0.132501 | 0.01706 | -0.00682553 | 0.019207 |             | LOC645506 | GOT2L1   |
| 446 | rs207177    | 1  | 55790336  | LDL.C | Coronary heart disease | 0.132501 | 0.01706 | -0.006045   | 0.017737 |             | LOC645506 | GOT2L1   |
| 447 | rs2129944   | 19 | 10516198  | LDL.C | Coronary heart disease | -0.06425 | 0.01156 | -0.009696   | 0.010861 |             | CDC37     | PDE4A    |
| 448 | rs2129944   | 19 | 10516198  | LDL.C | Myocardial infarction  | -0.06425 | 0.01156 | -0.0179499  | 0.012113 |             | CDC37     | PDE4A    |
| 449 | rs2207132   | 20 | 39142516  | LDL.C | Coronary heart disease | 0.139733 | 0.02452 | 0.136203    | 0.03514  |             | HSPEP1    | MAFB     |
| 450 | rs2207132   | 20 | 39142516  | LDL.C | Myocardial infarction  | 0.139733 | 0.02452 | 0.111906    | 0.040866 |             | HSPEP1    | MAFB     |
| 451 | rs2207132   | 20 | 39179822  | LDL.C | Cardioembolic stroke   | 0.139733 | 0.02452 | 0.178       | 0.205    |             | HSPEP1    | MAFB     |
| 452 | rs56028521  | 2  | 21074998  | LDL.C | Coronary heart disease | -0.11864 | 0.01542 | -0.015153   | 0.017241 |             | C2orf43   | APOB     |
| 453 | rs56028521  | 2  | 21074998  | LDL.C | Myocardial infarction  | -0.11864 | 0.01542 | 0.0159716   | 0.019108 |             | C2orf43   | APOB     |
| 454 | rs565436    | 1  | 55524601  | LDL.C | Myocardial infarction  | 0.075169 | 0.01159 | 0.012141    | 0.012084 | PCSK9       | BSND      | USP24    |
| 455 | rs565436    | 1  | 55524842  | LDL.C | Ischemic stroke        | 0.075169 | 0.01159 | -0.0035     | 0.0177   | PCSK9       | BSND      | USP24    |
| 456 | rs565436    | 1  | 55524842  | LDL.C | Cardioembolic stroke   | 0.075169 | 0.01159 | 0.0287      | 0.0349   | PCSK9       | BSND      | USP24    |
| 457 | rs565436    | 1  | 55524842  | LDL.C | Large vessel disease   | 0.075169 | 0.01159 | -0.0286     | 0.0376   | PCSK9       | BSND      | USP24    |
| 458 | rs565436    | 1  | 55524601  | LDL.C | Coronary heart disease | 0.075169 | 0.01159 | 0.010546    | 0.010958 | PCSK9       | BSND      | USP24    |
| 459 | rs565436    | 1  | 55524842  | LDL.C | Small vessel disease   | 0.075169 | 0.01159 | -0.0159     | 0.0394   | PCSK9       | BSND      | USP24    |
| 460 | rs62523994  | 8  | 145031265 | LDL.C | Ischemic stroke        | 0.057408 | 0.01014 | 0.0021      | 0.0165   | PLEC1 PLEC1 | EPPK1     | PARP10   |
| 461 | rs62523994  | 8  | 145026582 | LDL.C | Coronary heart disease | 0.057408 | 0.01014 | -0.003448   | 0.01003  | PLEC1 PLEC1 | EPPK1     | PARP10   |
| 462 | rs62523994  | 8  | 145031265 | LDL.C | Large vessel disease   | 0.057408 | 0.01014 | 0.0228      | 0.0353   | PLEC1 PLEC1 | EPPK1     | PARP10   |
| 463 | rs62523994  | 8  | 145026582 | LDL.C | Myocardial infarction  | 0.057408 | 0.01014 | -0.00505999 | 0.011087 | PLEC1 PLEC1 | EPPK1     | PARP10   |
| 464 | rs62523994  | 8  | 145031265 | LDL.C | Small vessel disease   | 0.057408 | 0.01014 | -0.0497     | 0.0362   | PLEC1 PLEC1 | EPPK1     | PARP10   |
| 465 | rs62523994  | 8  | 145031265 | LDL.C | Cardioembolic stroke   | 0.057408 | 0.01014 | 0.0001      | 0.0325   | PLEC1 PLEC1 | EPPK1     | PARP10   |
| 466 | rs629301    | 1  | 109818306 | LDL.C | Small vessel disease   | 0.127323 | 0.0119  | -0.0002     | 0.0422   | CELSR2      | SARS      | PSRC1    |
| 467 | rs629301    | 1  | 109818306 | LDL.C | Ischemic stroke        | 0.127323 | 0.0119  | 0.0022      | 0.0191   | CELSR2      | SARS      | PSRC1    |
| 468 | rs629301    | 1  | 109818306 | LDL.C | Coronary heart disease | 0.127323 | 0.0119  | 0.101444    | 0.011423 | CELSR2      | SARS      | PSRC1    |
| 469 | rs629301    | 1  | 109818306 | LDL.C | Large vessel disease   | 0.127323 | 0.0119  | 0.1         | 0.0414   | CELSR2      | SARS      | PSRC1    |
| 470 | rs629301    | 1  | 109818306 | LDL.C | Myocardial infarction  | 0.127323 | 0.0119  | 0.0875246   | 0.012685 | CELSR2      | SARS      | PSRC1    |

|     |            |    |           |       |                        |          |         |            |          |                      |              |              |
|-----|------------|----|-----------|-------|------------------------|----------|---------|------------|----------|----------------------|--------------|--------------|
| 471 | rs629301   | 1  | 109818306 | LDL.C | Cardioembolic stroke   | 0.127323 | 0.0119  | 0.0349     | 0.0376   | CELSR2               | SARS         | PSRC1        |
| 472 | rs635634   | 9  | 136155000 | LDL.C | Coronary heart disease | 0.069575 | 0.01235 | 0.077157   | 0.011712 |                      | ABO          | LOC653163    |
| 473 | rs635634   | 9  | 136155000 | LDL.C | Myocardial infarction  | 0.069575 | 0.01235 | 0.10933    | 0.013093 |                      | ABO          | LOC653163    |
| 474 | rs6756629  | 2  | 44065090  | LDL.C | Small vessel disease   | -0.14254 | 0.01817 | -0.0699    | 0.0738   | ABCG5                | DYNC2LI1     | ABCG8        |
| 475 | rs6756629  | 2  | 44065090  | LDL.C | Myocardial infarction  | -0.14254 | 0.01817 | -0.0798551 | 0.023391 | ABCG8                | DYNC2LI1     | ABCG8        |
| 476 | rs6756629  | 2  | 44065090  | LDL.C | Coronary heart disease | -0.14254 | 0.01817 | -0.098614  | 0.020976 | ABCG5                | DYNC2LI1     | ABCG8        |
| 477 | rs6756629  | 2  | 44065090  | LDL.C | Cardioembolic stroke   | -0.14254 | 0.01817 | -0.1936    | 0.069    | ABCG8                | DYNC2LI1     | ABCG8        |
| 478 | rs6756629  | 2  | 44065090  | LDL.C | Large vessel disease   | -0.14254 | 0.01817 | -0.1785    | 0.074    | ABCG5                | DYNC2LI1     | ABCG8        |
| 479 | rs6756629  | 2  | 44065090  | LDL.C | Ischemic stroke        | -0.14254 | 0.01817 | -0.1013    | 0.0335   | ABCG8                | DYNC2LI1     | ABCG8        |
| 480 | rs7256200  | 19 | 45415935  | LDL.C | Myocardial infarction  | 0.215084 | 0.01414 | 0.0922879  | 0.017993 | APOC1                | APOE         | APOC1        |
| 481 | rs7256200  | 19 | 45415935  | LDL.C | Coronary heart disease | 0.215084 | 0.01414 | 0.09126    | 0.016203 | APOC1                | APOE         | APOC1        |
| 482 | rs73066442 | 7  | 21592973  | LDL.C | Myocardial infarction  | 0.071078 | 0.01143 | 0.0134498  | 0.013185 |                      |              |              |
| 483 | rs73066442 | 7  | 21600902  | LDL.C | Cardioembolic stroke   | 0.071078 | 0.01143 | -0.0133    | 0.0389   |                      |              |              |
| 484 | rs73066442 | 7  | 21600902  | LDL.C | Ischemic stroke        | 0.071078 | 0.01143 | -0.0092    | 0.0195   |                      |              |              |
| 485 | rs73066442 | 7  | 21592973  | LDL.C | Coronary heart disease | 0.071078 | 0.01143 | 0.017463   | 0.011775 |                      |              |              |
| 486 | rs73066442 | 7  | 21600902  | LDL.C | Large vessel disease   | 0.071078 | 0.01143 | -0.0617    | 0.0421   |                      |              |              |
| 487 | rs73066442 | 7  | 21600902  | LDL.C | Small vessel disease   | 0.071078 | 0.01143 | 0.0198     | 0.0423   |                      |              |              |
| 488 | rs73107473 | 7  | 44577622  | LDL.C | Coronary heart disease | 0.077046 | 0.01342 | 0.025694   | 0.015067 |                      |              |              |
| 489 | rs73107473 | 7  | 44577622  | LDL.C | Myocardial infarction  | 0.077046 | 0.01342 | 0.0136987  | 0.016804 |                      |              |              |
| 490 | rs7412     | 19 | 45412079  | LDL.C | Myocardial infarction  | -0.59188 | 0.02506 | -0.122218  | 0.023946 | APOE<br>LOC100129500 | TOMM40       | APOC1        |
| 491 | rs7412     | 19 | 45412079  | LDL.C | Coronary heart disease | -0.59188 | 0.02506 | -0.137045  | 0.021092 | APOE<br>LOC100129500 | TOMM40       | APOC1        |
| 492 | rs76670936 | 19 | 45196581  | LDL.C | Myocardial infarction  | -0.15027 | 0.01847 | -0.0194139 | 0.018375 |                      |              |              |
| 493 | rs76670936 | 19 | 45196581  | LDL.C | Coronary heart disease | -0.15027 | 0.01847 | -0.019526  | 0.016483 |                      |              |              |
| 494 | rs8106814  | 19 | 45447161  | LDL.C | Small vessel disease   | -0.10275 | 0.01439 | 0.0264     | 0.0389   |                      | LOC100129500 | APOC4        |
| 495 | rs8106814  | 19 | 45447161  | LDL.C | Ischemic stroke        | -0.10275 | 0.01439 | 0.0147     | 0.0175   |                      | LOC100129500 | APOC4        |
| 496 | rs8106814  | 19 | 45447161  | LDL.C | Large vessel disease   | -0.10275 | 0.01439 | -0.0053    | 0.0379   |                      | LOC100129500 | APOC4        |
| 497 | rs8106814  | 19 | 45441608  | LDL.C | Myocardial infarction  | -0.10275 | 0.01439 | -0.0212562 | 0.015495 |                      | LOC100129500 | APOC4        |
| 498 | rs8106814  | 19 | 45447161  | LDL.C | Cardioembolic stroke   | -0.10275 | 0.01439 | 0.0207     | 0.0345   |                      | LOC100129500 | APOC4        |
| 499 | rs8106814  | 19 | 45441608  | LDL.C | Coronary heart disease | -0.10275 | 0.01439 | -0.006333  | 0.013953 |                      | LOC100129500 | APOC4        |
| 500 | rs934197   | 2  | 21267461  | LDL.C | Myocardial infarction  | 0.119953 | 0.01096 | 0.0403677  | 0.011725 |                      | APOB         | LOC100129278 |
| 501 | rs934197   | 2  | 21267461  | LDL.C | Coronary heart disease | 0.119953 | 0.01096 | 0.043338   | 0.010625 |                      | APOB         | LOC100129278 |
| 502 | rs964184   | 11 | 116648917 | LDL.C | Cardioembolic stroke   | -0.08761 | 0.01402 | -0.0127    | 0.0464   | ZNF259               | BUD13        | ZNF259       |
| 503 | rs964184   | 11 | 116648917 | LDL.C | Myocardial infarction  | -0.08761 | 0.01402 | -0.0487708 | 0.013873 | ZNF259               | BUD13        | ZNF259       |

|     |             |    |           |           |                        |          |         |             |          |              |         |              |
|-----|-------------|----|-----------|-----------|------------------------|----------|---------|-------------|----------|--------------|---------|--------------|
| 504 | rs964184    | 11 | 116648917 | LDL.C     | Small vessel disease   | -0.08761 | 0.01402 | -0.0253     | 0.0533   | ZNF259       | BUD13   | ZNF259       |
| 505 | rs964184    | 11 | 116648917 | LDL.C     | Large vessel disease   | -0.08761 | 0.01402 | -0.0184     | 0.0505   | ZNF259       | BUD13   | ZNF259       |
| 506 | rs964184    | 11 | 116648917 | LDL.C     | Ischemic stroke        | -0.08761 | 0.01402 | -0.0074     | 0.024    | ZNF259       | BUD13   | ZNF259       |
| 507 | rs964184    | 11 | 116648917 | LDL.C     | Coronary heart disease | -0.08761 | 0.01402 | -0.049958   | 0.012399 | ZNF259       | BUD13   | ZNF259       |
| 508 | rs1168001   | 1  | 62943954  | M.VLDL.TG | Ischemic stroke        | 0.071966 | 0.01071 | -0.0191     | 0.0169   | DOCK7        | USP1    | ANGPTL3      |
| 509 | rs1168001   | 1  | 62933758  | M.VLDL.TG | Coronary heart disease | 0.071966 | 0.01071 | 0.011256    | 0.009631 | DOCK7        | USP1    | ANGPTL3      |
| 510 | rs1168001   | 1  | 62943954  | M.VLDL.TG | Small vessel disease   | 0.071966 | 0.01071 | -0.0881     | 0.0369   | DOCK7        | USP1    | ANGPTL3      |
| 511 | rs1168001   | 1  | 62933758  | M.VLDL.TG | Myocardial infarction  | 0.071966 | 0.01071 | 0.00130512  | 0.010626 | DOCK7        | USP1    | ANGPTL3      |
| 512 | rs1168001   | 1  | 62943954  | M.VLDL.TG | Large vessel disease   | 0.071966 | 0.01071 | -0.0135     | 0.0357   | DOCK7        | USP1    | ANGPTL3      |
| 513 | rs1168001   | 1  | 62943954  | M.VLDL.TG | Cardioembolic stroke   | 0.071966 | 0.01071 | -0.0324     | 0.0332   | DOCK7        | USP1    | ANGPTL3      |
| 514 | rs116843064 | 19 | 8429323   | M.VLDL.TG | Coronary heart disease | -0.21024 | 0.0353  | -0.140783   | 0.042934 |              |         |              |
| 515 | rs116843064 | 19 | 8429323   | M.VLDL.TG | Myocardial infarction  | -0.21024 | 0.0353  | -0.0785914  | 0.047735 |              |         |              |
| 516 | rs1260326   | 2  | 27730940  | M.VLDL.TG | Ischemic stroke        | -0.09462 | 0.01028 | 0.012       | 0.0162   | GCKR         | FNDC4   | LOC100130981 |
| 517 | rs1260326   | 2  | 27730940  | M.VLDL.TG | Coronary heart disease | -0.09462 | 0.01028 | 0.003257    | 0.00962  | GCKR         | FNDC4   | LOC100130981 |
| 518 | rs1260326   | 2  | 27730940  | M.VLDL.TG | Small vessel disease   | -0.09462 | 0.01028 | -0.0441     | 0.0353   | GCKR         | FNDC4   | LOC100130981 |
| 519 | rs1260326   | 2  | 27730940  | M.VLDL.TG | Myocardial infarction  | -0.09462 | 0.01028 | 0.00111651  | 0.010666 | GCKR         | FNDC4   | LOC100130981 |
| 520 | rs1260326   | 2  | 27730940  | M.VLDL.TG | Large vessel disease   | -0.09462 | 0.01028 | 0.0392      | 0.0341   | GCKR         | FNDC4   | LOC100130981 |
| 521 | rs1260326   | 2  | 27730940  | M.VLDL.TG | Cardioembolic stroke   | -0.09462 | 0.01028 | 0.0401      | 0.0314   | GCKR         | FNDC4   | LOC100130981 |
| 522 | rs34121855  | 7  | 73040814  | M.VLDL.TG | Coronary heart disease | -0.11673 | 0.01322 | -0.008264   | 0.012812 |              | MLXIPL  | VPS37D       |
| 523 | rs34121855  | 7  | 73040814  | M.VLDL.TG | Myocardial infarction  | -0.11673 | 0.01322 | -0.0057277  | 0.01437  |              | MLXIPL  | VPS37D       |
| 524 | rs439401    | 19 | 45414451  | M.VLDL.TG | Myocardial infarction  | 0.079744 | 0.01113 | 0.0073697   | 0.011585 | LOC100129500 | APOE    | APOC1        |
| 525 | rs439401    | 19 | 45414451  | M.VLDL.TG | Ischemic stroke        | 0.079744 | 0.01113 | 0.0117      | 0.0185   | LOC100129500 | APOE    | APOC1        |
| 526 | rs439401    | 19 | 45414451  | M.VLDL.TG | Large vessel disease   | 0.079744 | 0.01113 | 0.0074      | 0.0374   | LOC100129500 | APOE    | APOC1        |
| 527 | rs439401    | 19 | 45414451  | M.VLDL.TG | Small vessel disease   | 0.079744 | 0.01113 | 0.0657      | 0.039    | LOC100129500 | APOE    | APOC1        |
| 528 | rs439401    | 19 | 45414451  | M.VLDL.TG | Coronary heart disease | 0.079744 | 0.01113 | -0.002693   | 0.010339 | LOC100129500 | APOE    | APOC1        |
| 529 | rs439401    | 19 | 45414451  | M.VLDL.TG | Cardioembolic stroke   | 0.079744 | 0.01113 | -0.039      | 0.0357   | LOC100129500 | APOE    | APOC1        |
| 530 | rs6065904   | 20 | 44534651  | M.VLDL.TG | Myocardial infarction  | 0.076963 | 0.01178 | -0.0231151  | 0.01205  | PLTP         | CTSA    | FLJ40606     |
| 531 | rs6065904   | 20 | 44534651  | M.VLDL.TG | Ischemic stroke        | 0.076963 | 0.01178 | -0.0149     | 0.0197   | PLTP         | CTSA    | FLJ40606     |
| 532 | rs6065904   | 20 | 44534651  | M.VLDL.TG | Small vessel disease   | 0.076963 | 0.01178 | 0.039       | 0.0432   | PLTP         | CTSA    | FLJ40606     |
| 533 | rs6065904   | 20 | 44534651  | M.VLDL.TG | Cardioembolic stroke   | 0.076963 | 0.01178 | -0.005      | 0.0387   | PLTP         | CTSA    | FLJ40606     |
| 534 | rs6065904   | 20 | 44534651  | M.VLDL.TG | Large vessel disease   | 0.076963 | 0.01178 | -0.0002     | 0.042    | PLTP         | CTSA    | FLJ40606     |
| 535 | rs6065904   | 20 | 44534651  | M.VLDL.TG | Coronary heart disease | 0.076963 | 0.01178 | -0.019307   | 0.010831 | PLTP         | CTSA    | FLJ40606     |
| 536 | rs673548    | 2  | 21237544  | M.VLDL.TG | Small vessel disease   | -0.0795  | 0.01125 | 0.0267      | 0.0422   | APOB         | C2orf43 | LOC100129278 |
| 537 | rs673548    | 2  | 21237544  | M.VLDL.TG | Myocardial infarction  | -0.0795  | 0.01125 | -0.00869972 | 0.011657 | APOB         | C2orf43 | LOC100129278 |
| 538 | rs673548    | 2  | 21237544  | M.VLDL.TG | Ischemic stroke        | -0.0795  | 0.01125 | 0.0108      | 0.019    | APOB         | C2orf43 | LOC100129278 |
| 539 | rs673548    | 2  | 21237544  | M.VLDL.TG | Large vessel disease   | -0.0795  | 0.01125 | 0.0047      | 0.0411   | APOB         | C2orf43 | LOC100129278 |
| 540 | rs673548    | 2  | 21237544  | M.VLDL.TG | Cardioembolic stroke   | -0.0795  | 0.01125 | 0.0189      | 0.0372   | APOB         | C2orf43 | LOC100129278 |
| 541 | rs673548    | 2  | 21237544  | M.VLDL.TG | Coronary heart disease | -0.0795  | 0.01125 | 0.004686    | 0.010499 | APOB         | C2orf43 | LOC100129278 |
| 542 | rs72999033  | 19 | 19407718  | M.VLDL.TG | Large vessel disease   | -0.13825 | 0.02116 | 0.1255      | 0.0702   |              |         |              |
| 543 | rs72999033  | 19 | 19366632  | M.VLDL.TG | Coronary heart disease | -0.13825 | 0.02116 | -0.051959   | 0.021377 |              |         |              |
| 544 | rs72999033  | 19 | 19407718  | M.VLDL.TG | Cardioembolic stroke   | -0.13825 | 0.02116 | 0.0972      | 0.0645   |              |         |              |

|     |            |    |           |           |                        |          |         |            |          |                           |              |              |
|-----|------------|----|-----------|-----------|------------------------|----------|---------|------------|----------|---------------------------|--------------|--------------|
| 545 | rs72999033 | 19 | 19366632  | M.VLDL.TG | Myocardial infarction  | -0.13825 | 0.02116 | -0.0370382 | 0.023873 |                           |              |              |
| 546 | rs72999033 | 19 | 19407718  | M.VLDL.TG | Small vessel disease   | -0.13825 | 0.02116 | 0.0398     | 0.0744   |                           |              |              |
| 547 | rs72999033 | 19 | 19407718  | M.VLDL.TG | Ischemic stroke        | -0.13825 | 0.02116 | 0.0212     | 0.0335   |                           |              |              |
| 548 | rs77697917 | 17 | 41840849  | M.VLDL.TG | Myocardial infarction  | 0.208758 | 0.03728 | 0.100482   | 0.046662 |                           |              |              |
| 549 | rs77697917 | 17 | 41840849  | M.VLDL.TG | Coronary heart disease | 0.208758 | 0.03728 | 0.086417   | 0.042583 |                           |              |              |
| 550 | rs79236614 | 8  | 19863471  | M.VLDL.TG | Large vessel disease   | -0.16649 | 0.01734 | 0.0137     | 0.0575   |                           |              |              |
| 551 | rs79236614 | 8  | 19860460  | M.VLDL.TG | Coronary heart disease | -0.16649 | 0.01734 | -0.048868  | 0.016017 |                           |              |              |
| 552 | rs79236614 | 8  | 19863471  | M.VLDL.TG | Ischemic stroke        | -0.16649 | 0.01734 | 0.0356     | 0.0277   |                           |              |              |
| 553 | rs79236614 | 8  | 19863471  | M.VLDL.TG | Small vessel disease   | -0.16649 | 0.01734 | 0.0002     | 0.0624   |                           |              |              |
| 554 | rs79236614 | 8  | 19860460  | M.VLDL.TG | Myocardial infarction  | -0.16649 | 0.01734 | -0.0613922 | 0.017899 |                           |              |              |
| 555 | rs79236614 | 8  | 19863471  | M.VLDL.TG | Cardioembolic stroke   | -0.16649 | 0.01734 | 0.093      | 0.0542   |                           |              |              |
| 556 | rs821840   | 16 | 56993886  | M.VLDL.TG | Myocardial infarction  | -0.06991 | 0.01173 | -0.0346335 | 0.012304 | CETP                      | HERPUD1      | CETP         |
| 557 | rs821840   | 16 | 56993886  | M.VLDL.TG | Coronary heart disease | -0.06991 | 0.01173 | -0.040648  | 0.011129 | CETP                      | HERPUD1      | CETP         |
| 558 | rs9472125  | 6  | 43756169  | M.VLDL.TG | Coronary heart disease | -0.0913  | 0.01627 | -0.054856  | 0.019233 |                           | VEGFA        | LOC100132354 |
| 559 | rs9472125  | 6  | 43756169  | M.VLDL.TG | Myocardial infarction  | -0.0913  | 0.01627 | -0.0503078 | 0.021507 |                           | VEGFA        | LOC100132354 |
| 560 | rs964184   | 11 | 116648917 | M.VLDL.TG | Cardioembolic stroke   | -0.22829 | 0.01407 | -0.0127    | 0.0464   | ZNF259                    | BUD13        | ZNF259       |
| 561 | rs964184   | 11 | 116648917 | M.VLDL.TG | Ischemic stroke        | -0.22829 | 0.01407 | -0.0074    | 0.024    | ZNF259                    | BUD13        | ZNF259       |
| 562 | rs964184   | 11 | 116648917 | M.VLDL.TG | Small vessel disease   | -0.22829 | 0.01407 | -0.0253    | 0.0533   | ZNF259                    | BUD13        | ZNF259       |
| 563 | rs964184   | 11 | 116648917 | M.VLDL.TG | Coronary heart disease | -0.22829 | 0.01407 | -0.049958  | 0.012399 | ZNF259                    | BUD13        | ZNF259       |
| 564 | rs964184   | 11 | 116648917 | M.VLDL.TG | Large vessel disease   | -0.22829 | 0.01407 | -0.0184    | 0.0505   | ZNF259                    | BUD13        | ZNF259       |
| 565 | rs964184   | 11 | 116648917 | M.VLDL.TG | Myocardial infarction  | -0.22829 | 0.01407 | -0.0487708 | 0.013873 | ZNF259                    | BUD13        | ZNF259       |
| 566 | rs1260326  | 2  | 27730940  | S.HDL.TG  | Coronary heart disease | -0.06854 | 0.01024 | 0.003257   | 0.00962  | GCKR                      | FNDC4        | LOC100130981 |
| 567 | rs1260326  | 2  | 27730940  | S.HDL.TG  | Small vessel disease   | -0.06854 | 0.01024 | -0.0441    | 0.0353   | GCKR                      | FNDC4        | LOC100130981 |
| 568 | rs1260326  | 2  | 27730940  | S.HDL.TG  | Ischemic stroke        | -0.06854 | 0.01024 | 0.012      | 0.0162   | GCKR                      | FNDC4        | LOC100130981 |
| 569 | rs1260326  | 2  | 27730940  | S.HDL.TG  | Cardioembolic stroke   | -0.06854 | 0.01024 | 0.0401     | 0.0314   | GCKR                      | FNDC4        | LOC100130981 |
| 570 | rs1260326  | 2  | 27730940  | S.HDL.TG  | Myocardial infarction  | -0.06854 | 0.01024 | 0.00111651 | 0.010666 | GCKR                      | FNDC4        | LOC100130981 |
| 571 | rs1260326  | 2  | 27730940  | S.HDL.TG  | Large vessel disease   | -0.06854 | 0.01024 | 0.0392     | 0.0341   | GCKR                      | FNDC4        | LOC100130981 |
| 572 | rs1848922  | 2  | 21471603  | S.HDL.TG  | Myocardial infarction  | 0.07423  | 0.01213 | 0.0301768  | 0.013003 |                           | LOC100129278 | LOC645949    |
| 573 | rs1848922  | 2  | 21471603  | S.HDL.TG  | Coronary heart disease | 0.07423  | 0.01213 | 0.047369   | 0.011832 |                           | LOC100129278 | LOC645949    |
| 574 | rs34356624 | 8  | 19903935  | S.HDL.TG  | Myocardial infarction  | 0.22161  | 0.0392  | 0.031392   | 0.051351 |                           | LPL          | SLC18A1      |
| 575 | rs34356624 | 8  | 19903935  | S.HDL.TG  | Coronary heart disease | 0.22161  | 0.0392  | 0.067869   | 0.04467  |                           | LPL          | SLC18A1      |
| 576 | rs3764261  | 16 | 56993324  | S.HDL.TG  | Ischemic stroke        | -0.14805 | 0.01076 | 0.0102     | 0.0175   |                           | HERPUD1      | CETP         |
| 577 | rs3764261  | 16 | 56993324  | S.HDL.TG  | Coronary heart disease | -0.14805 | 0.01076 | -0.032189  | 0.010108 |                           | HERPUD1      | CETP         |
| 578 | rs3764261  | 16 | 56993324  | S.HDL.TG  | Small vessel disease   | -0.14805 | 0.01076 | 0.0027     | 0.0382   |                           | HERPUD1      | CETP         |
| 579 | rs3764261  | 16 | 56993324  | S.HDL.TG  | Large vessel disease   | -0.14805 | 0.01076 | 0.0256     | 0.0369   |                           | HERPUD1      | CETP         |
| 580 | rs3764261  | 16 | 56993324  | S.HDL.TG  | Myocardial infarction  | -0.14805 | 0.01076 | -0.0282979 | 0.011199 |                           | HERPUD1      | CETP         |
| 581 | rs3764261  | 16 | 56993324  | S.HDL.TG  | Cardioembolic stroke   | -0.14805 | 0.01076 | 0.0074     | 0.0345   |                           | HERPUD1      | CETP         |
| 582 | rs429358   | 19 | 45411941  | S.HDL.TG  | Coronary heart disease | 0.100423 | 0.01344 | 0.090851   | 0.015181 | LOC100129500<br>APOE APOE | TOMM40       | APOC1        |
| 583 | rs429358   | 19 | 45411941  | S.HDL.TG  | Myocardial infarction  | 0.100423 | 0.01344 | 0.0961904  | 0.016943 | LOC100129500<br>APOE APOE | TOMM40       | APOC1        |



|     |            |    |           |           |                        |          |         |            |          |        |         |              |
|-----|------------|----|-----------|-----------|------------------------|----------|---------|------------|----------|--------|---------|--------------|
| 584 | rs4296389  | 2  | 21142994  | S.HDL.TG  | Myocardial infarction  | -0.07718 | 0.01057 | -0.0112562 | 0.01124  |        | C2orf43 | APOB         |
| 585 | rs4296389  | 2  | 21142994  | S.HDL.TG  | Coronary heart disease | -0.07718 | 0.01057 | -0.012159  | 0.010207 |        | C2orf43 | APOB         |
| 586 | rs5880     | 16 | 57015091  | S.HDL.TG  | Myocardial infarction  | 0.185425 | 0.03162 | 0.0247342  | 0.0245   | CETP   | HERPUD1 | LOC100130044 |
| 587 | rs5880     | 16 | 57015091  | S.HDL.TG  | Small vessel disease   | 0.185425 | 0.03162 | -0.0283    | 0.0961   | CETP   | HERPUD1 | LOC100130044 |
| 588 | rs5880     | 16 | 57015091  | S.HDL.TG  | Coronary heart disease | 0.185425 | 0.03162 | 0.007277   | 0.022421 | CETP   | HERPUD1 | LOC100130044 |
| 589 | rs5880     | 16 | 57015091  | S.HDL.TG  | Large vessel disease   | 0.185425 | 0.03162 | -0.0992    | 0.0884   | CETP   | HERPUD1 | LOC100130044 |
| 590 | rs5880     | 16 | 57015091  | S.HDL.TG  | Ischemic stroke        | 0.185425 | 0.03162 | 0.0364     | 0.0422   | CETP   | HERPUD1 | LOC100130044 |
| 591 | rs5880     | 16 | 57015091  | S.HDL.TG  | Cardioembolic stroke   | 0.185425 | 0.03162 | 0.0874     | 0.0838   | CETP   | HERPUD1 | LOC100130044 |
| 592 | rs6065904  | 20 | 44534651  | S.HDL.TG  | Large vessel disease   | 0.09016  | 0.01172 | -0.0002    | 0.042    | PLTP   | CTSA    | FLJ40606     |
| 593 | rs6065904  | 20 | 44534651  | S.HDL.TG  | Myocardial infarction  | 0.09016  | 0.01172 | -0.0231151 | 0.01205  | PLTP   | CTSA    | FLJ40606     |
| 594 | rs6065904  | 20 | 44534651  | S.HDL.TG  | Ischemic stroke        | 0.09016  | 0.01172 | -0.0149    | 0.0197   | PLTP   | CTSA    | FLJ40606     |
| 595 | rs6065904  | 20 | 44534651  | S.HDL.TG  | Coronary heart disease | 0.09016  | 0.01172 | -0.019307  | 0.010831 | PLTP   | CTSA    | FLJ40606     |
| 596 | rs6065904  | 20 | 44534651  | S.HDL.TG  | Small vessel disease   | 0.09016  | 0.01172 | 0.039      | 0.0432   | PLTP   | CTSA    | FLJ40606     |
| 597 | rs6065904  | 20 | 44534651  | S.HDL.TG  | Cardioembolic stroke   | 0.09016  | 0.01172 | -0.005     | 0.0387   | PLTP   | CTSA    | FLJ40606     |
| 598 | rs6511720  | 19 | 11202306  | S.HDL.TG  | Myocardial infarction  | -0.09761 | 0.01668 | -0.100786  | 0.01894  | LDLR   | SMARCA4 | SPC24        |
| 599 | rs6511720  | 19 | 11202306  | S.HDL.TG  | Coronary heart disease | -0.09761 | 0.01668 | -0.125298  | 0.016945 | LDLR   | SMARCA4 | SPC24        |
| 600 | rs6511720  | 19 | 11202306  | S.HDL.TG  | Cardioembolic stroke   | -0.09761 | 0.01668 | -0.0567    | 0.048    | LDLR   | SMARCA4 | SPC24        |
| 601 | rs6511720  | 19 | 11202306  | S.HDL.TG  | Small vessel disease   | -0.09761 | 0.01668 | -0.013     | 0.0549   | LDLR   | SMARCA4 | SPC24        |
| 602 | rs6511720  | 19 | 11202306  | S.HDL.TG  | Large vessel disease   | -0.09761 | 0.01668 | -0.0924    | 0.0525   | LDLR   | SMARCA4 | SPC24        |
| 603 | rs6511720  | 19 | 11202306  | S.HDL.TG  | Ischemic stroke        | -0.09761 | 0.01668 | -0.0708    | 0.0249   | LDLR   | SMARCA4 | SPC24        |
| 604 | rs6957745  | 7  | 73056750  | S.HDL.TG  | Myocardial infarction  | -0.08997 | 0.01332 | 0.00089487 | 0.0143   |        | MLXIPL  | VPS37D       |
| 605 | rs6957745  | 7  | 73056750  | S.HDL.TG  | Coronary heart disease | -0.08997 | 0.01332 | -0.002156  | 0.012657 |        | MLXIPL  | VPS37D       |
| 606 | rs79236614 | 8  | 19863471  | S.HDL.TG  | Cardioembolic stroke   | -0.16453 | 0.01727 | 0.093      | 0.0542   |        |         |              |
| 607 | rs79236614 | 8  | 19860460  | S.HDL.TG  | Myocardial infarction  | -0.16453 | 0.01727 | -0.0613922 | 0.017899 |        |         |              |
| 608 | rs79236614 | 8  | 19863471  | S.HDL.TG  | Ischemic stroke        | -0.16453 | 0.01727 | 0.0356     | 0.0277   |        |         |              |
| 609 | rs79236614 | 8  | 19863471  | S.HDL.TG  | Large vessel disease   | -0.16453 | 0.01727 | 0.0137     | 0.0575   |        |         |              |
| 610 | rs79236614 | 8  | 19860460  | S.HDL.TG  | Coronary heart disease | -0.16453 | 0.01727 | -0.048868  | 0.016017 |        |         |              |
| 611 | rs79236614 | 8  | 19863471  | S.HDL.TG  | Small vessel disease   | -0.16453 | 0.01727 | 0.0002     | 0.0624   |        |         |              |
| 612 | rs9472125  | 6  | 43756169  | S.HDL.TG  | Coronary heart disease | -0.09179 | 0.01615 | -0.054856  | 0.019233 |        | VEGFA   | LOC100132354 |
| 613 | rs9472125  | 6  | 43756169  | S.HDL.TG  | Myocardial infarction  | -0.09179 | 0.01615 | -0.0503078 | 0.021507 |        | VEGFA   | LOC100132354 |
| 614 | rs964184   | 11 | 116648917 | S.HDL.TG  | Large vessel disease   | -0.19875 | 0.01403 | -0.0184    | 0.0505   | ZNF259 | BUD13   | ZNF259       |
| 615 | rs964184   | 11 | 116648917 | S.HDL.TG  | Small vessel disease   | -0.19875 | 0.01403 | -0.0253    | 0.0533   | ZNF259 | BUD13   | ZNF259       |
| 616 | rs964184   | 11 | 116648917 | S.HDL.TG  | Cardioembolic stroke   | -0.19875 | 0.01403 | -0.0127    | 0.0464   | ZNF259 | BUD13   | ZNF259       |
| 617 | rs964184   | 11 | 116648917 | S.HDL.TG  | Ischemic stroke        | -0.19875 | 0.01403 | -0.0074    | 0.024    | ZNF259 | BUD13   | ZNF259       |
| 618 | rs964184   | 11 | 116648917 | S.HDL.TG  | Myocardial infarction  | -0.19875 | 0.01403 | -0.0487708 | 0.013873 | ZNF259 | BUD13   | ZNF259       |
| 619 | rs964184   | 11 | 116648917 | S.HDL.TG  | Coronary heart disease | -0.19875 | 0.01403 | -0.049958  | 0.012399 | ZNF259 | BUD13   | ZNF259       |
| 620 | rs10401845 | 19 | 11195030  | S.VLDL.TG | Large vessel disease   | -0.07756 | 0.01311 | -0.0754    | 0.0454   |        | SMARCA4 | LDLR         |
| 621 | rs10401845 | 19 | 11191536  | S.VLDL.TG | Myocardial infarction  | -0.07756 | 0.01311 | -0.0545598 | 0.014377 |        | SMARCA4 | LDLR         |
| 622 | rs10401845 | 19 | 11195030  | S.VLDL.TG | Small vessel disease   | -0.07756 | 0.01311 | 0.0049     | 0.0464   |        | SMARCA4 | LDLR         |
| 623 | rs10401845 | 19 | 11195030  | S.VLDL.TG | Cardioembolic stroke   | -0.07756 | 0.01311 | -0.0289    | 0.0421   |        | SMARCA4 | LDLR         |
| 624 | rs10401845 | 19 | 11191536  | S.VLDL.TG | Coronary heart disease | -0.07756 | 0.01311 | -0.068144  | 0.012854 |        | SMARCA4 | LDLR         |

|     |             |    |           |           |                        |          |         |             |          |                            |              |              |
|-----|-------------|----|-----------|-----------|------------------------|----------|---------|-------------|----------|----------------------------|--------------|--------------|
| 625 | rs10401845  | 19 | 11195030  | S.VLDL.TG | Ischemic stroke        | -0.07756 | 0.01311 | -0.0645     | 0.0213   |                            | SMARCA4      | LDLR         |
| 626 | rs1042034   | 2  | 21225281  | S.VLDL.TG | Cardioembolic stroke   | 0.105215 | 0.01116 | -0.0065     | 0.037    | APOB                       | C2orf43      | LOC100129278 |
| 627 | rs1042034   | 2  | 21225281  | S.VLDL.TG | Large vessel disease   | 0.105215 | 0.01116 | 0.0053      | 0.0411   | APOB                       | C2orf43      | LOC100129278 |
| 628 | rs1042034   | 2  | 21225281  | S.VLDL.TG | Ischemic stroke        | 0.105215 | 0.01116 | -0.0078     | 0.0189   | APOB                       | C2orf43      | LOC100129278 |
| 629 | rs1042034   | 2  | 21225281  | S.VLDL.TG | Myocardial infarction  | 0.105215 | 0.01116 | 0.0144442   | 0.011604 | APOB                       | C2orf43      | LOC100129278 |
| 630 | rs1042034   | 2  | 21225281  | S.VLDL.TG | Small vessel disease   | 0.105215 | 0.01116 | -0.0211     | 0.0422   | APOB                       | C2orf43      | LOC100129278 |
| 631 | rs1042034   | 2  | 21225281  | S.VLDL.TG | Coronary heart disease | 0.105215 | 0.01116 | 0.001246    | 0.010546 | APOB                       | C2orf43      | LOC100129278 |
| 632 | rs115849089 | 8  | 19912370  | S.VLDL.TG | Coronary heart disease | -0.17615 | 0.01665 | -0.057989   | 0.015294 |                            |              |              |
| 633 | rs115849089 | 8  | 19912370  | S.VLDL.TG | Myocardial infarction  | -0.17615 | 0.01665 | -0.0667741  | 0.017021 |                            |              |              |
| 634 | rs1168041   | 1  | 62960250  | S.VLDL.TG | Ischemic stroke        | 0.085968 | 0.01122 | -0.0095     | 0.0178   | DOCK7                      | USP1         | ANGPTL3      |
| 635 | rs1168041   | 1  | 62960250  | S.VLDL.TG | Myocardial infarction  | 0.085968 | 0.01122 | 0.00067632  | 0.011148 | DOCK7                      | USP1         | ANGPTL3      |
| 636 | rs1168041   | 1  | 62960250  | S.VLDL.TG | Large vessel disease   | 0.085968 | 0.01122 | -0.0152     | 0.0373   | DOCK7                      | USP1         | ANGPTL3      |
| 637 | rs1168041   | 1  | 62960250  | S.VLDL.TG | Cardioembolic stroke   | 0.085968 | 0.01122 | -0.0236     | 0.0353   | DOCK7                      | USP1         | ANGPTL3      |
| 638 | rs1168041   | 1  | 62960250  | S.VLDL.TG | Small vessel disease   | 0.085968 | 0.01122 | -0.0781     | 0.0389   | DOCK7                      | USP1         | ANGPTL3      |
| 639 | rs1168041   | 1  | 62960250  | S.VLDL.TG | Coronary heart disease | 0.085968 | 0.01122 | 0.011014    | 0.01011  | DOCK7                      | USP1         | ANGPTL3      |
| 640 | rs116843064 | 19 | 8429323   | S.VLDL.TG | Coronary heart disease | -0.21144 | 0.03501 | -0.140783   | 0.042934 |                            |              |              |
| 641 | rs116843064 | 19 | 8429323   | S.VLDL.TG | Myocardial infarction  | -0.21144 | 0.03501 | -0.0785914  | 0.047735 |                            |              |              |
| 642 | rs117001569 | 8  | 19574920  | S.VLDL.TG | Coronary heart disease | -0.23226 | 0.04118 | -0.090808   | 0.071186 |                            |              |              |
| 643 | rs1260326   | 2  | 27730940  | S.VLDL.TG | Ischemic stroke        | -0.09945 | 0.0102  | 0.012       | 0.0162   | GCKR                       | FNDC4        | LOC100130981 |
| 644 | rs1260326   | 2  | 27730940  | S.VLDL.TG | Myocardial infarction  | -0.09945 | 0.0102  | 0.00111651  | 0.010666 | GCKR                       | FNDC4        | LOC100130981 |
| 645 | rs1260326   | 2  | 27730940  | S.VLDL.TG | Coronary heart disease | -0.09945 | 0.0102  | 0.003257    | 0.00962  | GCKR                       | FNDC4        | LOC100130981 |
| 646 | rs1260326   | 2  | 27730940  | S.VLDL.TG | Cardioembolic stroke   | -0.09945 | 0.0102  | 0.0401      | 0.0314   | GCKR                       | FNDC4        | LOC100130981 |
| 647 | rs1260326   | 2  | 27730940  | S.VLDL.TG | Small vessel disease   | -0.09945 | 0.0102  | -0.0441     | 0.0353   | GCKR                       | FNDC4        | LOC100130981 |
| 648 | rs1260326   | 2  | 27730940  | S.VLDL.TG | Large vessel disease   | -0.09945 | 0.0102  | 0.0392      | 0.0341   | GCKR                       | FNDC4        | LOC100130981 |
| 649 | rs2980853   | 8  | 126478350 | S.VLDL.TG | Cardioembolic stroke   | -0.0722  | 0.00983 | 0.014       | 0.0315   |                            | TRIB1        | LOC100130231 |
| 650 | rs2980853   | 8  | 126478350 | S.VLDL.TG | Large vessel disease   | -0.0722  | 0.00983 | -0.0372     | 0.0342   |                            | TRIB1        | LOC100130231 |
| 651 | rs2980853   | 8  | 126478350 | S.VLDL.TG | Ischemic stroke        | -0.0722  | 0.00983 | -0.0183     | 0.016    |                            | TRIB1        | LOC100130231 |
| 652 | rs2980853   | 8  | 126478350 | S.VLDL.TG | Coronary heart disease | -0.0722  | 0.00983 | -0.04431    | 0.009307 |                            | TRIB1        | LOC100130231 |
| 653 | rs2980853   | 8  | 126478350 | S.VLDL.TG | Small vessel disease   | -0.0722  | 0.00983 | -0.044      | 0.0351   |                            | TRIB1        | LOC100130231 |
| 654 | rs2980853   | 8  | 126478350 | S.VLDL.TG | Myocardial infarction  | -0.0722  | 0.00983 | -0.0457093  | 0.01039  |                            | TRIB1        | LOC100130231 |
| 655 | rs34346326  | 7  | 73016181  | S.VLDL.TG | Myocardial infarction  | -0.11253 | 0.01438 | -0.00956639 | 0.014338 | MLXIPL<br>MLXIPL<br>MLXIPL | TBL2         | VPS37D       |
| 656 | rs34346326  | 7  | 73016181  | S.VLDL.TG | Coronary heart disease | -0.11253 | 0.01438 | -0.010364   | 0.012808 | MLXIPL                     | TBL2         | VPS37D       |
| 657 | rs3826688   | 19 | 45418961  | S.VLDL.TG | Myocardial infarction  | 0.089897 | 0.01111 | 0.00625308  | 0.011862 | LOC100129500               | APOE         | APOC4        |
| 658 | rs3826688   | 19 | 45418961  | S.VLDL.TG | Coronary heart disease | 0.089897 | 0.01111 | -0.001932   | 0.010616 | LOC100129500               | APOE         | APOC4        |
| 659 | rs5167      | 19 | 45448465  | S.VLDL.TG | Coronary heart disease | 0.058389 | 0.01048 | -0.011396   | 0.009972 | APOC4<br>APOC2             | LOC100129500 | APOC2        |
| 660 | rs5167      | 19 | 45448465  | S.VLDL.TG | Large vessel disease   | 0.058389 | 0.01048 | -0.0336     | 0.0367   | APOC4                      | LOC100129500 | APOC2        |

|     |             |    |           |           |                        |          |         |             |          |                |              |              |
|-----|-------------|----|-----------|-----------|------------------------|----------|---------|-------------|----------|----------------|--------------|--------------|
| 661 | rs5167      | 19 | 45448465  | S.VLDL.TG | Cardioembolic stroke   | 0.058389 | 0.01048 | 0.0132      | 0.0337   | APOC2<br>APOC4 | LOC100129500 | APOC2        |
| 662 | rs5167      | 19 | 45448465  | S.VLDL.TG | Myocardial infarction  | 0.058389 | 0.01048 | 0.00215658  | 0.011172 | APOC2<br>APOC4 | LOC100129500 | APOC2        |
| 663 | rs5167      | 19 | 45448465  | S.VLDL.TG | Ischemic stroke        | 0.058389 | 0.01048 | -0.0007     | 0.0172   | APOC2<br>APOC4 | LOC100129500 | APOC2        |
| 664 | rs5167      | 19 | 45448465  | S.VLDL.TG | Small vessel disease   | 0.058389 | 0.01048 | -0.0064     | 0.0383   | APOC4          | LOC100129500 | APOC2        |
| 665 | rs6065904   | 20 | 44534651  | S.VLDL.TG | Cardioembolic stroke   | 0.075779 | 0.0117  | -0.005      | 0.0387   | PLTP           | CTSA         | FLJ40606     |
| 666 | rs6065904   | 20 | 44534651  | S.VLDL.TG | Ischemic stroke        | 0.075779 | 0.0117  | -0.0149     | 0.0197   | PLTP           | CTSA         | FLJ40606     |
| 667 | rs6065904   | 20 | 44534651  | S.VLDL.TG | Myocardial infarction  | 0.075779 | 0.0117  | -0.0231151  | 0.01205  | PLTP           | CTSA         | FLJ40606     |
| 668 | rs6065904   | 20 | 44534651  | S.VLDL.TG | Small vessel disease   | 0.075779 | 0.0117  | 0.039       | 0.0432   | PLTP           | CTSA         | FLJ40606     |
| 669 | rs6065904   | 20 | 44534651  | S.VLDL.TG | Large vessel disease   | 0.075779 | 0.0117  | -0.0002     | 0.042    | PLTP           | CTSA         | FLJ40606     |
| 670 | rs6065904   | 20 | 44534651  | S.VLDL.TG | Coronary heart disease | 0.075779 | 0.0117  | -0.019307   | 0.010831 | PLTP           | CTSA         | FLJ40606     |
| 671 | rs72836561  | 17 | 41926126  | S.VLDL.TG | Myocardial infarction  | 0.215165 | 0.03583 | 0.0776109   | 0.045358 |                |              |              |
| 672 | rs72836561  | 17 | 41926126  | S.VLDL.TG | Coronary heart disease | 0.215165 | 0.03583 | 0.0642      | 0.041047 |                |              |              |
| 673 | rs72999033  | 19 | 19407718  | S.VLDL.TG | Cardioembolic stroke   | -0.15488 | 0.02101 | 0.0972      | 0.0645   |                |              |              |
| 674 | rs72999033  | 19 | 19407718  | S.VLDL.TG | Large vessel disease   | -0.15488 | 0.02101 | 0.1255      | 0.0702   |                |              |              |
| 675 | rs72999033  | 19 | 19366632  | S.VLDL.TG | Myocardial infarction  | -0.15488 | 0.02101 | -0.0370382  | 0.023873 |                |              |              |
| 676 | rs72999033  | 19 | 19407718  | S.VLDL.TG | Ischemic stroke        | -0.15488 | 0.02101 | 0.0212      | 0.0335   |                |              |              |
| 677 | rs72999033  | 19 | 19407718  | S.VLDL.TG | Small vessel disease   | -0.15488 | 0.02101 | 0.0398      | 0.0744   |                |              |              |
| 678 | rs72999033  | 19 | 19366632  | S.VLDL.TG | Coronary heart disease | -0.15488 | 0.02101 | -0.051959   | 0.021377 |                |              |              |
| 679 | rs821840    | 16 | 56993886  | S.VLDL.TG | Coronary heart disease | -0.10861 | 0.01163 | -0.040648   | 0.011129 | CETP           | HERPUD1      | CETP         |
| 680 | rs821840    | 16 | 56993886  | S.VLDL.TG | Myocardial infarction  | -0.10861 | 0.01163 | -0.0346335  | 0.012304 | CETP           | HERPUD1      | CETP         |
| 681 | rs9472125   | 6  | 43756169  | S.VLDL.TG | Coronary heart disease | -0.09517 | 0.01611 | -0.054856   | 0.019233 |                | VEGFA        | LOC100132354 |
| 682 | rs9472125   | 6  | 43756169  | S.VLDL.TG | Myocardial infarction  | -0.09517 | 0.01611 | -0.0503078  | 0.021507 |                | VEGFA        | LOC100132354 |
| 683 | rs964184    | 11 | 116648917 | S.VLDL.TG | Large vessel disease   | -0.24229 | 0.01396 | -0.0184     | 0.0505   | ZNF259         | BUD13        | ZNF259       |
| 684 | rs964184    | 11 | 116648917 | S.VLDL.TG | Cardioembolic stroke   | -0.24229 | 0.01396 | -0.0127     | 0.0464   | ZNF259         | BUD13        | ZNF259       |
| 685 | rs964184    | 11 | 116648917 | S.VLDL.TG | Myocardial infarction  | -0.24229 | 0.01396 | -0.0487708  | 0.013873 | ZNF259         | BUD13        | ZNF259       |
| 686 | rs964184    | 11 | 116648917 | S.VLDL.TG | Ischemic stroke        | -0.24229 | 0.01396 | -0.0074     | 0.024    | ZNF259         | BUD13        | ZNF259       |
| 687 | rs964184    | 11 | 116648917 | S.VLDL.TG | Coronary heart disease | -0.24229 | 0.01396 | -0.049958   | 0.012399 | ZNF259         | BUD13        | ZNF259       |
| 688 | rs964184    | 11 | 116648917 | S.VLDL.TG | Small vessel disease   | -0.24229 | 0.01396 | -0.0253     | 0.0533   | ZNF259         | BUD13        | ZNF259       |
| 689 | rs10402112  | 19 | 11191677  | TC        | Myocardial infarction  | -0.20061 | 0.01695 | -0.08984    | 0.018299 |                | SMARCA4      | LDLR         |
| 690 | rs10402112  | 19 | 11191677  | TC        | Coronary heart disease | -0.20061 | 0.01695 | -0.111993   | 0.016403 |                | SMARCA4      | LDLR         |
| 691 | rs10449300  | 1  | 109381904 | TC        | Myocardial infarction  | -0.06057 | 0.01082 | -0.00383047 | 0.011533 | C1orf62        | STXBP3       | LOC642864    |
| 692 | rs10449300  | 1  | 109381904 | TC        | Coronary heart disease | -0.06057 | 0.01082 | -0.008912   | 0.010388 | C1orf62        | STXBP3       | LOC642864    |
| 693 | rs111617668 | 2  | 44055922  | TC        | Coronary heart disease | -0.10687 | 0.01858 | -0.094204   | 0.021066 |                |              |              |
| 694 | rs111617668 | 2  | 44065090  | TC        | Small vessel disease   | -0.10687 | 0.01858 | -0.0699     | 0.0738   |                |              |              |
| 695 | rs111617668 | 2  | 44065090  | TC        | Large vessel disease   | -0.10687 | 0.01858 | -0.1785     | 0.074    |                |              |              |
| 696 | rs111617668 | 2  | 44065090  | TC        | Cardioembolic stroke   | -0.10687 | 0.01858 | -0.1936     | 0.069    |                |              |              |
| 697 | rs111617668 | 2  | 44065090  | TC        | Ischemic stroke        | -0.10687 | 0.01858 | -0.1013     | 0.0335   |                |              |              |
| 698 | rs111617668 | 2  | 44055922  | TC        | Myocardial infarction  | -0.10687 | 0.01858 | -0.0684965  | 0.023417 |                |              |              |

|     |             |    |          |    |                        |          |         |             |          |       |           |              |
|-----|-------------|----|----------|----|------------------------|----------|---------|-------------|----------|-------|-----------|--------------|
| 699 | rs11591147  | 1  | 55505647 | TC | Myocardial infarction  | -0.46021 | 0.03486 | -0.354653   | 0.068555 | PCSK9 | BSND      | USP24        |
| 700 | rs11591147  | 1  | 55505647 | TC | Coronary heart disease | -0.46021 | 0.03486 | -0.256502   | 0.057259 | PCSK9 | BSND      | USP24        |
| 701 | rs1168041   | 1  | 62960250 | TC | Ischemic stroke        | 0.063879 | 0.01124 | -0.0095     | 0.0178   | DOCK7 | USP1      | ANGPTL3      |
| 702 | rs1168041   | 1  | 62960250 | TC | Small vessel disease   | 0.063879 | 0.01124 | -0.0781     | 0.0389   | DOCK7 | USP1      | ANGPTL3      |
| 703 | rs1168041   | 1  | 62960250 | TC | Cardioembolic stroke   | 0.063879 | 0.01124 | -0.0236     | 0.0353   | DOCK7 | USP1      | ANGPTL3      |
| 704 | rs1168041   | 1  | 62960250 | TC | Myocardial infarction  | 0.063879 | 0.01124 | 0.00067632  | 0.011148 | DOCK7 | USP1      | ANGPTL3      |
| 705 | rs1168041   | 1  | 62960250 | TC | Large vessel disease   | 0.063879 | 0.01124 | -0.0152     | 0.0373   | DOCK7 | USP1      | ANGPTL3      |
| 706 | rs1168041   | 1  | 62960250 | TC | Coronary heart disease | 0.063879 | 0.01124 | 0.011014    | 0.01011  | DOCK7 | USP1      | ANGPTL3      |
| 707 | rs1260326   | 2  | 27730940 | TC | Ischemic stroke        | -0.06805 | 0.01022 | 0.012       | 0.0162   | GCKR  | FNDC4     | LOC100130981 |
| 708 | rs1260326   | 2  | 27730940 | TC | Large vessel disease   | -0.06805 | 0.01022 | 0.0392      | 0.0341   | GCKR  | FNDC4     | LOC100130981 |
| 709 | rs1260326   | 2  | 27730940 | TC | Coronary heart disease | -0.06805 | 0.01022 | 0.003257    | 0.00962  | GCKR  | FNDC4     | LOC100130981 |
| 710 | rs1260326   | 2  | 27730940 | TC | Myocardial infarction  | -0.06805 | 0.01022 | 0.00111651  | 0.010666 | GCKR  | FNDC4     | LOC100130981 |
| 711 | rs1260326   | 2  | 27730940 | TC | Cardioembolic stroke   | -0.06805 | 0.01022 | 0.0401      | 0.0314   | GCKR  | FNDC4     | LOC100130981 |
| 712 | rs1260326   | 2  | 27730940 | TC | Small vessel disease   | -0.06805 | 0.01022 | -0.0441     | 0.0353   | GCKR  | FNDC4     | LOC100130981 |
| 713 | rs143341434 | 1  | 54759547 | TC | Myocardial infarction  | -0.24183 | 0.02848 | -0.0393462  | 0.060482 |       |           |              |
| 714 | rs143341434 | 1  | 54759547 | TC | Coronary heart disease | -0.24183 | 0.02848 | -0.016655   | 0.053934 |       |           |              |
| 715 | rs144064722 | 4  | 73406173 | TC | Coronary heart disease | 0.257328 | 0.03404 | 0.028313    | 0.031588 |       |           |              |
| 716 | rs144064722 | 4  | 73406173 | TC | Myocardial infarction  | 0.257328 | 0.03404 | 0.032534    | 0.034056 |       |           |              |
| 717 | rs1532085   | 15 | 58683366 | TC | Myocardial infarction  | -0.07682 | 0.00999 | -0.00988838 | 0.010417 |       | LOC441726 | LIPC         |
| 718 | rs1532085   | 15 | 58683366 | TC | Cardioembolic stroke   | -0.07682 | 0.00999 | 0.0091      | 0.0317   |       | LOC441726 | LIPC         |
| 719 | rs1532085   | 15 | 58683366 | TC | Coronary heart disease | -0.07682 | 0.00999 | -0.01812    | 0.009354 |       | LOC441726 | LIPC         |
| 720 | rs1532085   | 15 | 58683366 | TC | Small vessel disease   | -0.07682 | 0.00999 | 0.0405      | 0.0359   |       | LOC441726 | LIPC         |
| 721 | rs1532085   | 15 | 58683366 | TC | Ischemic stroke        | -0.07682 | 0.00999 | 0.0215      | 0.0161   |       | LOC441726 | LIPC         |
| 722 | rs1532085   | 15 | 58683366 | TC | Large vessel disease   | -0.07682 | 0.00999 | 0.016       | 0.0343   |       | LOC441726 | LIPC         |
| 723 | rs17699030  | 19 | 11330942 | TC | Small vessel disease   | -0.14729 | 0.02544 | -0.0209     | 0.1076   | DOCK6 | KANK2     | LOC55908     |
| 724 | rs17699030  | 19 | 11330942 | TC | Cardioembolic stroke   | -0.14729 | 0.02544 | 0.0981      | 0.0922   | DOCK6 | KANK2     | LOC55908     |
| 725 | rs17699030  | 19 | 11330942 | TC | Ischemic stroke        | -0.14729 | 0.02544 | 0.0162      | 0.0481   | DOCK6 | KANK2     | LOC55908     |
| 726 | rs17699030  | 19 | 11330942 | TC | Large vessel disease   | -0.14729 | 0.02544 | -0.0156     | 0.1066   | DOCK6 | KANK2     | LOC55908     |
| 727 | rs17699030  | 19 | 11330942 | TC | Coronary heart disease | -0.14729 | 0.02544 | 0.012748    | 0.023807 | DOCK6 | KANK2     | LOC55908     |
| 728 | rs17699030  | 19 | 11330942 | TC | Myocardial infarction  | -0.14729 | 0.02544 | -0.0045677  | 0.026753 | DOCK6 | KANK2     | LOC55908     |
| 729 | rs185415345 | 1  | 56625395 | TC | Coronary heart disease | -0.15302 | 0.02732 | -0.016587   | 0.037988 |       |           |              |
| 730 | rs185415345 | 1  | 56625395 | TC | Myocardial infarction  | -0.15302 | 0.02732 | -0.0279401  | 0.04292  |       |           |              |
| 731 | rs207177    | 1  | 55790861 | TC | Small vessel disease   | 0.122368 | 0.01711 | -0.0774     | 0.0599   |       | LOC645506 | GOT2L1       |
| 732 | rs207177    | 1  | 55790336 | TC | Myocardial infarction  | 0.122368 | 0.01711 | -0.00682553 | 0.019207 |       | LOC645506 | GOT2L1       |
| 733 | rs207177    | 1  | 55790861 | TC | Cardioembolic stroke   | 0.122368 | 0.01711 | -0.025      | 0.0537   |       | LOC645506 | GOT2L1       |
| 734 | rs207177    | 1  | 55790336 | TC | Coronary heart disease | 0.122368 | 0.01711 | -0.006045   | 0.017737 |       | LOC645506 | GOT2L1       |
| 735 | rs207177    | 1  | 55790861 | TC | Ischemic stroke        | 0.122368 | 0.01711 | 0.001       | 0.0271   |       | LOC645506 | GOT2L1       |
| 736 | rs207177    | 1  | 55790861 | TC | Large vessel disease   | 0.122368 | 0.01711 | -0.0321     | 0.0575   |       | LOC645506 | GOT2L1       |
| 737 | rs2207132   | 20 | 39142516 | TC | Myocardial infarction  | 0.135773 | 0.02456 | 0.111906    | 0.040866 |       | HSPEP1    | MAFB         |
| 738 | rs2207132   | 20 | 39142516 | TC | Coronary heart disease | 0.135773 | 0.02456 | 0.136203    | 0.03514  |       | HSPEP1    | MAFB         |
| 739 | rs2207132   | 20 | 39179822 | TC | Cardioembolic stroke   | 0.135773 | 0.02456 | 0.178       | 0.205    |       | HSPEP1    | MAFB         |

|     |            |    |           |    |                        |          |         |            |          |                                      |           |              |
|-----|------------|----|-----------|----|------------------------|----------|---------|------------|----------|--------------------------------------|-----------|--------------|
| 740 | rs2495477  | 1  | 55518467  | TC | Myocardial infarction  | -0.06096 | 0.0108  | -0.0362507 | 0.011685 | PCSK9                                | BSND      | USP24        |
| 741 | rs2495477  | 1  | 55518467  | TC | Coronary heart disease | -0.06096 | 0.0108  | -0.035937  | 0.010473 | PCSK9                                | BSND      | USP24        |
| 742 | rs261334   | 15 | 58726744  | TC | Small vessel disease   | -0.11089 | 0.01193 | -0.0739    | 0.0451   | LIPC                                 | LOC441726 | ADAM10       |
| 743 | rs261334   | 15 | 58726744  | TC | Coronary heart disease | -0.11089 | 0.01193 | -0.03756   | 0.011043 | LIPC                                 | LOC441726 | ADAM10       |
| 744 | rs261334   | 15 | 58726744  | TC | Large vessel disease   | -0.11089 | 0.01193 | 0.0677     | 0.0452   | LIPC                                 | LOC441726 | ADAM10       |
| 745 | rs261334   | 15 | 58726744  | TC | Myocardial infarction  | -0.11089 | 0.01193 | -0.0402744 | 0.012395 | LIPC                                 | LOC441726 | ADAM10       |
| 746 | rs261334   | 15 | 58726744  | TC | Ischemic stroke        | -0.11089 | 0.01193 | 0.0383     | 0.0211   | LIPC                                 | LOC441726 | ADAM10       |
| 747 | rs261334   | 15 | 58726744  | TC | Cardioembolic stroke   | -0.11089 | 0.01193 | 0.0623     | 0.0423   | LIPC                                 | LOC441726 | ADAM10       |
| 748 | rs2980853  | 8  | 126478350 | TC | Ischemic stroke        | -0.0625  | 0.00984 | -0.0183    | 0.016    |                                      | TRIB1     | LOC100130231 |
| 749 | rs2980853  | 8  | 126478350 | TC | Small vessel disease   | -0.0625  | 0.00984 | -0.044     | 0.0351   |                                      | TRIB1     | LOC100130231 |
| 750 | rs2980853  | 8  | 126478350 | TC | Cardioembolic stroke   | -0.0625  | 0.00984 | 0.014      | 0.0315   |                                      | TRIB1     | LOC100130231 |
| 751 | rs2980853  | 8  | 126478350 | TC | Coronary heart disease | -0.0625  | 0.00984 | -0.04431   | 0.009307 |                                      | TRIB1     | LOC100130231 |
| 752 | rs2980853  | 8  | 126478350 | TC | Myocardial infarction  | -0.0625  | 0.00984 | -0.0457093 | 0.01039  |                                      | TRIB1     | LOC100130231 |
| 753 | rs2980853  | 8  | 126478350 | TC | Large vessel disease   | -0.0625  | 0.00984 | -0.0372    | 0.0342   |                                      | TRIB1     | LOC100130231 |
| 754 | rs3741298  | 11 | 116657561 | TC | Coronary heart disease | -0.09192 | 0.01181 | -0.036789  | 0.010785 | ZNF259                               | BUD13     | APOA5        |
| 755 | rs3741298  | 11 | 116657561 | TC | Myocardial infarction  | -0.09192 | 0.01181 | -0.043033  | 0.012111 | ZNF259                               | BUD13     | APOA5        |
| 756 | rs61770425 | 1  | 55085125  | TC | Coronary heart disease | -0.06968 | 0.01214 | -0.013365  | 0.011281 | ACOT11                               | LOC645436 | C1orf175     |
| 757 | rs61770425 | 1  | 55085141  | TC | Small vessel disease   | -0.06968 | 0.01214 | -0.053     | 0.0447   | ACOT11                               | LOC645436 | C1orf175     |
| 758 | rs61770425 | 1  | 55085125  | TC | Myocardial infarction  | -0.06968 | 0.01214 | -0.0143256 | 0.012498 | ACOT11                               | LOC645436 | C1orf175     |
| 759 | rs61770425 | 1  | 55085141  | TC | Large vessel disease   | -0.06968 | 0.01214 | -0.1123    | 0.0423   | ACOT11                               | LOC645436 | C1orf175     |
| 760 | rs61770425 | 1  | 55085141  | TC | Cardioembolic stroke   | -0.06968 | 0.01214 | -0.0181    | 0.0396   | ACOT11                               | LOC645436 | C1orf175     |
| 761 | rs61770425 | 1  | 55085141  | TC | Ischemic stroke        | -0.06968 | 0.01214 | -0.0578    | 0.0207   | ACOT11                               | LOC645436 | C1orf175     |
| 762 | rs629301   | 1  | 109818306 | TC | Myocardial infarction  | 0.101805 | 0.01195 | 0.0875246  | 0.012685 | CELSR2                               | SARS      | PSRC1        |
| 763 | rs629301   | 1  | 109818306 | TC | Small vessel disease   | 0.101805 | 0.01195 | -0.0002    | 0.0422   | CELSR2                               | SARS      | PSRC1        |
| 764 | rs629301   | 1  | 109818306 | TC | Ischemic stroke        | 0.101805 | 0.01195 | 0.0022     | 0.0191   | CELSR2                               | SARS      | PSRC1        |
| 765 | rs629301   | 1  | 109818306 | TC | Cardioembolic stroke   | 0.101805 | 0.01195 | 0.0349     | 0.0376   | CELSR2                               | SARS      | PSRC1        |
| 766 | rs629301   | 1  | 109818306 | TC | Coronary heart disease | 0.101805 | 0.01195 | 0.101444   | 0.011423 | CELSR2                               | SARS      | PSRC1        |
| 767 | rs629301   | 1  | 109818306 | TC | Large vessel disease   | 0.101805 | 0.01195 | 0.1        | 0.0414   | CELSR2                               | SARS      | PSRC1        |
| 768 | rs7256200  | 19 | 45415935  | TC | Myocardial infarction  | 0.166001 | 0.01421 | 0.0922879  | 0.017993 | APOC1                                | APOE      | APOC1        |
| 769 | rs7256200  | 19 | 45415935  | TC | Coronary heart disease | 0.166001 | 0.01421 | 0.09126    | 0.016203 | APOC1                                | APOE      | APOC1        |
| 770 | rs72999033 | 19 | 19407718  | TC | Small vessel disease   | -0.12612 | 0.02104 | 0.0398     | 0.0744   |                                      |           |              |
| 771 | rs72999033 | 19 | 19407718  | TC | Large vessel disease   | -0.12612 | 0.02104 | 0.1255     | 0.0702   |                                      |           |              |
| 772 | rs72999033 | 19 | 19366632  | TC | Myocardial infarction  | -0.12612 | 0.02104 | -0.0370382 | 0.023873 |                                      |           |              |
| 773 | rs72999033 | 19 | 19407718  | TC | Ischemic stroke        | -0.12612 | 0.02104 | 0.0212     | 0.0335   |                                      |           |              |
| 774 | rs72999033 | 19 | 19407718  | TC | Cardioembolic stroke   | -0.12612 | 0.02104 | 0.0972     | 0.0645   |                                      |           |              |
| 775 | rs72999033 | 19 | 19366632  | TC | Coronary heart disease | -0.12612 | 0.02104 | -0.051959  | 0.021377 |                                      |           |              |
| 776 | rs7412     | 19 | 45412079  | TC | Myocardial infarction  | -0.41162 | 0.02529 | -0.122218  | 0.023946 | APOE<br>LOC100129500<br>LOC100129500 | TOMM40    | APOC1        |

|     |             |    |           |    |                        |          |         |             |          |                                      |         |              |
|-----|-------------|----|-----------|----|------------------------|----------|---------|-------------|----------|--------------------------------------|---------|--------------|
| 777 | rs7412      | 19 | 45412079  | TC | Coronary heart disease | -0.41162 | 0.02529 | -0.137045   | 0.021092 | APOE<br>LOC100129500<br>LOC100129500 | TOMM40  | APOC1        |
| 778 | rs76670936  | 19 | 45196581  | TC | Myocardial infarction  | -0.10818 | 0.01853 | -0.0194139  | 0.018375 |                                      |         |              |
| 779 | rs76670936  | 19 | 45196581  | TC | Coronary heart disease | -0.10818 | 0.01853 | -0.019526   | 0.016483 |                                      |         |              |
| 780 | rs79225634  | 5  | 74619639  | TC | Myocardial infarction  | 0.083426 | 0.01048 | 0.0202878   | 0.010617 |                                      |         |              |
| 781 | rs79225634  | 5  | 74619639  | TC | Coronary heart disease | 0.083426 | 0.01048 | 0.024313    | 0.009685 |                                      |         |              |
| 782 | rs952275    | 2  | 21221399  | TC | Ischemic stroke        | 0.088994 | 0.00989 | 0.0069      | 0.0171   |                                      | C2orf43 | APOB         |
| 783 | rs952275    | 2  | 21221399  | TC | Myocardial infarction  | 0.088994 | 0.00989 | 0.00687294  | 0.010567 |                                      | C2orf43 | APOB         |
| 784 | rs952275    | 2  | 21221399  | TC | Small vessel disease   | 0.088994 | 0.00989 | 0.0264      | 0.0391   |                                      | C2orf43 | APOB         |
| 785 | rs952275    | 2  | 21221399  | TC | Coronary heart disease | 0.088994 | 0.00989 | 0.016832    | 0.00964  |                                      | C2orf43 | APOB         |
| 786 | rs952275    | 2  | 21221399  | TC | Large vessel disease   | 0.088994 | 0.00989 | -0.0492     | 0.0389   |                                      | C2orf43 | APOB         |
| 787 | rs952275    | 2  | 21221399  | TC | Cardioembolic stroke   | 0.088994 | 0.00989 | 0.0069      | 0.0348   |                                      | C2orf43 | APOB         |
| 788 | rs115849089 | 8  | 19912370  | TG | Coronary heart disease | -0.16206 | 0.01666 | -0.057989   | 0.015294 |                                      |         |              |
| 789 | rs115849089 | 8  | 19912370  | TG | Myocardial infarction  | -0.16206 | 0.01666 | -0.0667741  | 0.017021 |                                      |         |              |
| 790 | rs1168041   | 1  | 62960250  | TG | Large vessel disease   | 0.095641 | 0.01121 | -0.0152     | 0.0373   | DOCK7                                | USP1    | ANGPTL3      |
| 791 | rs1168041   | 1  | 62960250  | TG | Small vessel disease   | 0.095641 | 0.01121 | -0.0781     | 0.0389   | DOCK7                                | USP1    | ANGPTL3      |
| 792 | rs1168041   | 1  | 62960250  | TG | Coronary heart disease | 0.095641 | 0.01121 | 0.011014    | 0.01011  | DOCK7                                | USP1    | ANGPTL3      |
| 793 | rs1168041   | 1  | 62960250  | TG | Myocardial infarction  | 0.095641 | 0.01121 | 0.00067632  | 0.011148 | DOCK7                                | USP1    | ANGPTL3      |
| 794 | rs1168041   | 1  | 62960250  | TG | Cardioembolic stroke   | 0.095641 | 0.01121 | -0.0236     | 0.0353   | DOCK7                                | USP1    | ANGPTL3      |
| 795 | rs1168041   | 1  | 62960250  | TG | Ischemic stroke        | 0.095641 | 0.01121 | -0.0095     | 0.0178   | DOCK7                                | USP1    | ANGPTL3      |
| 796 | rs1260326   | 2  | 27730940  | TG | Coronary heart disease | -0.106   | 0.01021 | 0.003257    | 0.00962  | GCKR                                 | FNDC4   | LOC100130981 |
| 797 | rs1260326   | 2  | 27730940  | TG | Large vessel disease   | -0.106   | 0.01021 | 0.0392      | 0.0341   | GCKR                                 | FNDC4   | LOC100130981 |
| 798 | rs1260326   | 2  | 27730940  | TG | Small vessel disease   | -0.106   | 0.01021 | -0.0441     | 0.0353   | GCKR                                 | FNDC4   | LOC100130981 |
| 799 | rs1260326   | 2  | 27730940  | TG | Cardioembolic stroke   | -0.106   | 0.01021 | 0.0401      | 0.0314   | GCKR                                 | FNDC4   | LOC100130981 |
| 800 | rs1260326   | 2  | 27730940  | TG | Myocardial infarction  | -0.106   | 0.01021 | 0.00111651  | 0.010666 | GCKR                                 | FNDC4   | LOC100130981 |
| 801 | rs1260326   | 2  | 27730940  | TG | Ischemic stroke        | -0.106   | 0.01021 | 0.012       | 0.0162   | GCKR                                 | FNDC4   | LOC100130981 |
| 802 | rs2980853   | 8  | 126478350 | TG | Coronary heart disease | -0.0744  | 0.00982 | -0.04431    | 0.009307 |                                      | TRIB1   | LOC100130231 |
| 803 | rs2980853   | 8  | 126478350 | TG | Small vessel disease   | -0.0744  | 0.00982 | -0.044      | 0.0351   |                                      | TRIB1   | LOC100130231 |
| 804 | rs2980853   | 8  | 126478350 | TG | Myocardial infarction  | -0.0744  | 0.00982 | -0.0457093  | 0.01039  |                                      | TRIB1   | LOC100130231 |
| 805 | rs2980853   | 8  | 126478350 | TG | Cardioembolic stroke   | -0.0744  | 0.00982 | 0.014       | 0.0315   |                                      | TRIB1   | LOC100130231 |
| 806 | rs2980853   | 8  | 126478350 | TG | Large vessel disease   | -0.0744  | 0.00982 | -0.0372     | 0.0342   |                                      | TRIB1   | LOC100130231 |
| 807 | rs2980853   | 8  | 126478350 | TG | Ischemic stroke        | -0.0744  | 0.00982 | -0.0183     | 0.016    |                                      | TRIB1   | LOC100130231 |
| 808 | rs34346326  | 7  | 73016181  | TG | Coronary heart disease | -0.09891 | 0.01306 | -0.010364   | 0.012808 | MLXIPL<br>MLXIPL<br>MLXIPL           | TBL2    | VPS37D       |
| 809 | rs34346326  | 7  | 73016181  | TG | Myocardial infarction  | -0.09891 | 0.01306 | -0.00956639 | 0.014338 | MLXIPL<br>MLXIPL<br>MLXIPL           | TBL2    | VPS37D       |
| 810 | rs429358    | 19 | 45411941  | TG | Myocardial infarction  | 0.117062 | 0.0134  | 0.0961904   | 0.016943 | LOC100129500<br>APOE APOE            | TOMM40  | APOC1        |

|     |             |    |           |           |                        |          |         |            |          |                           |              |              |
|-----|-------------|----|-----------|-----------|------------------------|----------|---------|------------|----------|---------------------------|--------------|--------------|
| 811 | rs429358    | 19 | 45411941  | TG        | Coronary heart disease | 0.117062 | 0.0134  | 0.090851   | 0.015181 | LOC100129500<br>APOE APOE | TOMM40       | APOC1        |
| 812 | rs4296389   | 2  | 21142994  | TG        | Myocardial infarction  | -0.09141 | 0.01053 | -0.0112562 | 0.01124  |                           | C2orf43      | APOB         |
| 813 | rs4296389   | 2  | 21142994  | TG        | Coronary heart disease | -0.09141 | 0.01053 | -0.012159  | 0.010207 |                           | C2orf43      | APOB         |
| 814 | rs5167      | 19 | 45448465  | TG        | Small vessel disease   | 0.062703 | 0.01049 | -0.0064    | 0.0383   | APOC2<br>APOC4            | LOC100129500 | APOC2        |
| 815 | rs5167      | 19 | 45448465  | TG        | Ischemic stroke        | 0.062703 | 0.01049 | -0.0007    | 0.0172   | APOC2<br>APOC4            | LOC100129500 | APOC2        |
| 816 | rs5167      | 19 | 45448465  | TG        | Large vessel disease   | 0.062703 | 0.01049 | -0.0336    | 0.0367   | APOC2<br>APOC4            | LOC100129500 | APOC2        |
| 817 | rs5167      | 19 | 45448465  | TG        | Myocardial infarction  | 0.062703 | 0.01049 | 0.00215658 | 0.011172 | APOC2<br>APOC4            | LOC100129500 | APOC2        |
| 818 | rs5167      | 19 | 45448465  | TG        | Cardioembolic stroke   | 0.062703 | 0.01049 | 0.0132     | 0.0337   | APOC2<br>APOC4            | LOC100129500 | APOC2        |
| 819 | rs5167      | 19 | 45448465  | TG        | Coronary heart disease | 0.062703 | 0.01049 | -0.011396  | 0.009972 | APOC2<br>APOC4            | LOC100129500 | APOC2        |
| 820 | rs72999033  | 19 | 19366632  | TG        | Myocardial infarction  | -0.16887 | 0.02101 | -0.0370382 | 0.023873 |                           |              |              |
| 821 | rs72999033  | 19 | 19407718  | TG        | Small vessel disease   | -0.16887 | 0.02101 | 0.0398     | 0.0744   |                           |              |              |
| 822 | rs72999033  | 19 | 19407718  | TG        | Large vessel disease   | -0.16887 | 0.02101 | 0.1255     | 0.0702   |                           |              |              |
| 823 | rs72999033  | 19 | 19407718  | TG        | Cardioembolic stroke   | -0.16887 | 0.02101 | 0.0972     | 0.0645   |                           |              |              |
| 824 | rs72999033  | 19 | 19366632  | TG        | Coronary heart disease | -0.16887 | 0.02101 | -0.051959  | 0.021377 |                           |              |              |
| 825 | rs72999033  | 19 | 19407718  | TG        | Ischemic stroke        | -0.16887 | 0.02101 | 0.0212     | 0.0335   |                           |              |              |
| 826 | rs821840    | 16 | 56993886  | TG        | Myocardial infarction  | -0.08153 | 0.01165 | -0.0346335 | 0.012304 | CETP                      | HERPUD1      | CETP         |
| 827 | rs821840    | 16 | 56993886  | TG        | Coronary heart disease | -0.08153 | 0.01165 | -0.040648  | 0.011129 | CETP                      | HERPUD1      | CETP         |
| 828 | rs9472125   | 6  | 43756169  | TG        | Coronary heart disease | -0.09456 | 0.01612 | -0.054856  | 0.019233 |                           | VEGFA        | LOC100132354 |
| 829 | rs9472125   | 6  | 43756169  | TG        | Myocardial infarction  | -0.09456 | 0.01612 | -0.0503078 | 0.021507 |                           | VEGFA        | LOC100132354 |
| 830 | rs964184    | 11 | 116648917 | TG        | Small vessel disease   | -0.23269 | 0.01397 | -0.0253    | 0.0533   | ZNF259                    | BUD13        | ZNF259       |
| 831 | rs964184    | 11 | 116648917 | TG        | Cardioembolic stroke   | -0.23269 | 0.01397 | -0.0127    | 0.0464   | ZNF259                    | BUD13        | ZNF259       |
| 832 | rs964184    | 11 | 116648917 | TG        | Coronary heart disease | -0.23269 | 0.01397 | -0.049958  | 0.012399 | ZNF259                    | BUD13        | ZNF259       |
| 833 | rs964184    | 11 | 116648917 | TG        | Myocardial infarction  | -0.23269 | 0.01397 | -0.0487708 | 0.013873 | ZNF259                    | BUD13        | ZNF259       |
| 834 | rs964184    | 11 | 116648917 | TG        | Ischemic stroke        | -0.23269 | 0.01397 | -0.0074    | 0.024    | ZNF259                    | BUD13        | ZNF259       |
| 835 | rs964184    | 11 | 116648917 | TG        | Large vessel disease   | -0.23269 | 0.01397 | -0.0184    | 0.0505   | ZNF259                    | BUD13        | ZNF259       |
| 836 | rs11096689  | 2  | 21140540  | XL.HDL.TG | Myocardial infarction  | -0.07276 | 0.01112 | -0.014713  | 0.01202  |                           | C2orf43      | APOB         |
| 837 | rs11096689  | 2  | 21140540  | XL.HDL.TG | Cardioembolic stroke   | -0.07276 | 0.01112 | -0.0376    | 0.038    |                           | C2orf43      | APOB         |
| 838 | rs11096689  | 2  | 21140540  | XL.HDL.TG | Ischemic stroke        | -0.07276 | 0.01112 | -0.0003    | 0.0189   |                           | C2orf43      | APOB         |
| 839 | rs11096689  | 2  | 21140540  | XL.HDL.TG | Large vessel disease   | -0.07276 | 0.01112 | 0.0637     | 0.0426   |                           | C2orf43      | APOB         |
| 840 | rs11096689  | 2  | 21140540  | XL.HDL.TG | Coronary heart disease | -0.07276 | 0.01112 | -0.022822  | 0.010891 |                           | C2orf43      | APOB         |
| 841 | rs11096689  | 2  | 21140540  | XL.HDL.TG | Small vessel disease   | -0.07276 | 0.01112 | -0.0216    | 0.043    |                           | C2orf43      | APOB         |
| 842 | rs113105798 | 15 | 59301460  | XL.HDL.TG | Coronary heart disease | 0.319035 | 0.03426 | -0.055219  | 0.040092 |                           |              |              |
| 843 | rs113105798 | 15 | 59301460  | XL.HDL.TG | Myocardial infarction  | 0.319035 | 0.03426 | -0.0400261 | 0.044667 |                           |              |              |
| 844 | rs113531395 | 17 | 4886829   | XL.HDL.TG | Myocardial infarction  | -0.20437 | 0.03621 | -0.0573797 | 0.067105 |                           |              |              |
| 845 | rs113531395 | 17 | 4886829   | XL.HDL.TG | Coronary heart disease | -0.20437 | 0.03621 | -0.046539  | 0.061719 |                           |              |              |
| 846 | rs11638718  | 15 | 58079462  | XL.HDL.TG | Cardioembolic stroke   | -0.07099 | 0.01214 | 0.0083     | 0.0378   |                           | GRINL1A      | ALDH1A2      |

|     |             |    |          |           |                        |          |         |             |          |      |              |         |
|-----|-------------|----|----------|-----------|------------------------|----------|---------|-------------|----------|------|--------------|---------|
| 847 | rs11638718  | 15 | 58079462 | XL.HDL.TG | Myocardial infarction  | -0.07099 | 0.01214 | -0.0261497  | 0.012643 |      | GRINL1A      | ALDH1A2 |
| 848 | rs11638718  | 15 | 58079462 | XL.HDL.TG | Large vessel disease   | -0.07099 | 0.01214 | 0.0158      | 0.0405   |      | GRINL1A      | ALDH1A2 |
| 849 | rs11638718  | 15 | 58079462 | XL.HDL.TG | Coronary heart disease | -0.07099 | 0.01214 | -0.020832   | 0.011376 |      | GRINL1A      | ALDH1A2 |
| 850 | rs11638718  | 15 | 58079462 | XL.HDL.TG | Ischemic stroke        | -0.07099 | 0.01214 | -0.0051     | 0.0197   |      | GRINL1A      | ALDH1A2 |
| 851 | rs11638718  | 15 | 58079462 | XL.HDL.TG | Small vessel disease   | -0.07099 | 0.01214 | -0.0337     | 0.0434   |      | GRINL1A      | ALDH1A2 |
| 852 | rs11662691  | 18 | 47183012 | XL.HDL.TG | Coronary heart disease | 0.094038 | 0.01612 | -0.027382   | 0.017857 |      | LOC100129143 | ACAA2   |
| 853 | rs11662691  | 18 | 47183012 | XL.HDL.TG | Cardioembolic stroke   | 0.094038 | 0.01612 | 0.0063      | 0.0676   |      | LOC100129143 | ACAA2   |
| 854 | rs11662691  | 18 | 47183012 | XL.HDL.TG | Ischemic stroke        | 0.094038 | 0.01612 | -0.0278     | 0.0341   |      | LOC100129143 | ACAA2   |
| 855 | rs11662691  | 18 | 47183012 | XL.HDL.TG | Large vessel disease   | 0.094038 | 0.01612 | -0.0217     | 0.0717   |      | LOC100129143 | ACAA2   |
| 856 | rs11662691  | 18 | 47183012 | XL.HDL.TG | Small vessel disease   | 0.094038 | 0.01612 | -0.0299     | 0.0744   |      | LOC100129143 | ACAA2   |
| 857 | rs11662691  | 18 | 47183012 | XL.HDL.TG | Myocardial infarction  | 0.094038 | 0.01612 | -0.0341334  | 0.019624 |      | LOC100129143 | ACAA2   |
| 858 | rs1318175   | 15 | 58586129 | XL.HDL.TG | Myocardial infarction  | -0.15738 | 0.01308 | -0.029757   | 0.014056 |      | LOC441726    | LIPC    |
| 859 | rs1318175   | 15 | 58586129 | XL.HDL.TG | Coronary heart disease | -0.15738 | 0.01308 | -0.021941   | 0.012657 |      | LOC441726    | LIPC    |
| 860 | rs146842281 | 15 | 59356659 | XL.HDL.TG | Coronary heart disease | 0.255873 | 0.02182 | 0.025121    | 0.033363 |      |              |         |
| 861 | rs146842281 | 15 | 59356659 | XL.HDL.TG | Myocardial infarction  | 0.255873 | 0.02182 | 0.0331942   | 0.039409 |      |              |         |
| 862 | rs149066100 | 15 | 58603692 | XL.HDL.TG | Coronary heart disease | 0.112049 | 0.01619 | 0.02181     | 0.019703 |      |              |         |
| 863 | rs149066100 | 15 | 58603692 | XL.HDL.TG | Myocardial infarction  | 0.112049 | 0.01619 | 0.0361669   | 0.021983 |      |              |         |
| 864 | rs1532085   | 15 | 58683366 | XL.HDL.TG | Cardioembolic stroke   | -0.26429 | 0.00986 | 0.0091      | 0.0317   |      | LOC441726    | LIPC    |
| 865 | rs1532085   | 15 | 58683366 | XL.HDL.TG | Small vessel disease   | -0.26429 | 0.00986 | 0.0405      | 0.0359   |      | LOC441726    | LIPC    |
| 866 | rs1532085   | 15 | 58683366 | XL.HDL.TG | Large vessel disease   | -0.26429 | 0.00986 | 0.016       | 0.0343   |      | LOC441726    | LIPC    |
| 867 | rs1532085   | 15 | 58683366 | XL.HDL.TG | Ischemic stroke        | -0.26429 | 0.00986 | 0.0215      | 0.0161   |      | LOC441726    | LIPC    |
| 868 | rs1532085   | 15 | 58683366 | XL.HDL.TG | Coronary heart disease | -0.26429 | 0.00986 | -0.01812    | 0.009354 |      | LOC441726    | LIPC    |
| 869 | rs1532085   | 15 | 58683366 | XL.HDL.TG | Myocardial infarction  | -0.26429 | 0.00986 | -0.00988838 | 0.010417 |      | LOC441726    | LIPC    |
| 870 | rs1540037   | 18 | 47182664 | XL.HDL.TG | Myocardial infarction  | 0.091687 | 0.01213 | -0.00483348 | 0.013661 |      | LOC100129143 | ACAA2   |
| 871 | rs1540037   | 18 | 47182664 | XL.HDL.TG | Coronary heart disease | 0.091687 | 0.01213 | -0.012746   | 0.012202 |      | LOC100129143 | ACAA2   |
| 872 | rs17231506  | 16 | 56994528 | XL.HDL.TG | Coronary heart disease | 0.069101 | 0.01085 | -0.033139   | 0.010231 | CETP | HERPUD1      | CETP    |
| 873 | rs17231506  | 16 | 56994528 | XL.HDL.TG | Myocardial infarction  | 0.069101 | 0.01085 | -0.0265218  | 0.011326 | CETP | HERPUD1      | CETP    |
| 874 | rs17414716  | 1  | 55759138 | XL.HDL.TG | Coronary heart disease | -0.21326 | 0.03256 | -0.144297   | 0.058125 |      | LOC645506    | GOT2L1  |
| 875 | rs17414716  | 1  | 55759138 | XL.HDL.TG | Myocardial infarction  | -0.21326 | 0.03256 | -0.160083   | 0.065546 |      | LOC645506    | GOT2L1  |
| 876 | rs181835401 | 1  | 63135955 | XL.HDL.TG | Coronary heart disease | -0.0897  | 0.01131 | -0.01186    | 0.009972 |      |              |         |
| 877 | rs181835401 | 1  | 63139730 | XL.HDL.TG | Cardioembolic stroke   | -0.0897  | 0.01131 | 0.0246      | 0.0347   |      |              |         |
| 878 | rs181835401 | 1  | 63139730 | XL.HDL.TG | Large vessel disease   | -0.0897  | 0.01131 | 0.0175      | 0.0369   |      |              |         |
| 879 | rs181835401 | 1  | 63139730 | XL.HDL.TG | Ischemic stroke        | -0.0897  | 0.01131 | 0.0189      | 0.0173   |      |              |         |
| 880 | rs181835401 | 1  | 63135955 | XL.HDL.TG | Myocardial infarction  | -0.0897  | 0.01131 | -0.00619888 | 0.01101  |      |              |         |
| 881 | rs181835401 | 1  | 63139730 | XL.HDL.TG | Small vessel disease   | -0.0897  | 0.01131 | 0.0816      | 0.0377   |      |              |         |
| 882 | rs192924868 | 15 | 59231939 | XL.HDL.TG | Coronary heart disease | 0.115122 | 0.02055 | 0.002444    | 0.025109 |      |              |         |
| 883 | rs192924868 | 15 | 59231939 | XL.HDL.TG | Myocardial infarction  | 0.115122 | 0.02055 | 0.0053657   | 0.028532 |      |              |         |
| 884 | rs2044332   | 15 | 58646641 | XL.HDL.TG | Coronary heart disease | 0.12199  | 0.01448 | 0.005484    | 0.013358 |      | LOC441726    | LIPC    |
| 885 | rs2044332   | 15 | 58646641 | XL.HDL.TG | Myocardial infarction  | 0.12199  | 0.01448 | -0.00567182 | 0.014995 |      | LOC441726    | LIPC    |
| 886 | rs2070895   | 15 | 58723939 | XL.HDL.TG | Cardioembolic stroke   | 0.301697 | 0.01151 | -0.0622     | 0.0419   | LIPC | LOC441726    | LIPC    |
| 887 | rs2070895   | 15 | 58723939 | XL.HDL.TG | Small vessel disease   | 0.301697 | 0.01151 | 0.0715      | 0.0449   | LIPC | LOC441726    | LIPC    |



|     |            |    |          |           |                        |          |         |             |          |              |              |           |
|-----|------------|----|----------|-----------|------------------------|----------|---------|-------------|----------|--------------|--------------|-----------|
| 888 | rs2070895  | 15 | 58723939 | XL.HDL.TG | Ischemic stroke        | 0.301697 | 0.01151 | -0.0355     | 0.0209   | LIPC         | LOC441726    | LIPC      |
| 889 | rs2070895  | 15 | 58723939 | XL.HDL.TG | Large vessel disease   | 0.301697 | 0.01151 | -0.0729     | 0.0446   | LIPC         | LOC441726    | LIPC      |
| 890 | rs2070895  | 15 | 58723939 | XL.HDL.TG | Coronary heart disease | 0.301697 | 0.01151 | 0.037159    | 0.010782 | LIPC         | LOC441726    | LIPC      |
| 891 | rs2070895  | 15 | 58723939 | XL.HDL.TG | Myocardial infarction  | 0.301697 | 0.01151 | 0.0413675   | 0.012105 | LIPC         | LOC441726    | LIPC      |
| 892 | rs28595548 | 15 | 58464126 | XL.HDL.TG | Small vessel disease   | -0.086   | 0.01109 | -0.0199     | 0.0418   | AQP9         | ALDH1A2      | LOC441726 |
| 893 | rs28595548 | 15 | 58464126 | XL.HDL.TG | Cardioembolic stroke   | -0.086   | 0.01109 | 0.0077      | 0.0377   | AQP9         | ALDH1A2      | LOC441726 |
| 894 | rs28595548 | 15 | 58464126 | XL.HDL.TG | Ischemic stroke        | -0.086   | 0.01109 | -0.0018     | 0.0189   | AQP9         | ALDH1A2      | LOC441726 |
| 895 | rs28595548 | 15 | 58457666 | XL.HDL.TG | Myocardial infarction  | -0.086   | 0.01109 | 0.00804728  | 0.012505 | AQP9         | ALDH1A2      | LOC441726 |
| 896 | rs28595548 | 15 | 58457666 | XL.HDL.TG | Coronary heart disease | -0.086   | 0.01109 | 0.010437    | 0.011338 | AQP9         | ALDH1A2      | LOC441726 |
| 897 | rs28595548 | 15 | 58464126 | XL.HDL.TG | Large vessel disease   | -0.086   | 0.01109 | 0.0202      | 0.0402   | AQP9         | ALDH1A2      | LOC441726 |
| 898 | rs2881925  | 2  | 20390694 | XL.HDL.TG | Cardioembolic stroke   | -0.05615 | 0.00978 | 0.0148      | 0.0332   |              | LOC402069    | SDC1      |
| 899 | rs2881925  | 2  | 20390694 | XL.HDL.TG | Ischemic stroke        | -0.05615 | 0.00978 | 0.0173      | 0.0166   |              | LOC402069    | SDC1      |
| 900 | rs2881925  | 2  | 20390694 | XL.HDL.TG | Coronary heart disease | -0.05615 | 0.00978 | 0.015701    | 0.009477 |              | LOC402069    | SDC1      |
| 901 | rs2881925  | 2  | 20390694 | XL.HDL.TG | Large vessel disease   | -0.05615 | 0.00978 | -0.0261     | 0.0356   |              | LOC402069    | SDC1      |
| 902 | rs2881925  | 2  | 20390694 | XL.HDL.TG | Small vessel disease   | -0.05615 | 0.00978 | 0.0435      | 0.0363   |              | LOC402069    | SDC1      |
| 903 | rs2881925  | 2  | 20390694 | XL.HDL.TG | Myocardial infarction  | -0.05615 | 0.00978 | 0.0242637   | 0.010491 |              | LOC402069    | SDC1      |
| 904 | rs439401   | 19 | 45414451 | XL.HDL.TG | Cardioembolic stroke   | 0.086072 | 0.01103 | -0.039      | 0.0357   | LOC100129500 | APOE         | APOC1     |
| 905 | rs439401   | 19 | 45414451 | XL.HDL.TG | Large vessel disease   | 0.086072 | 0.01103 | 0.0074      | 0.0374   | LOC100129500 | APOE         | APOC1     |
| 906 | rs439401   | 19 | 45414451 | XL.HDL.TG | Myocardial infarction  | 0.086072 | 0.01103 | 0.0073697   | 0.011585 | LOC100129500 | APOE         | APOC1     |
| 907 | rs439401   | 19 | 45414451 | XL.HDL.TG | Coronary heart disease | 0.086072 | 0.01103 | -0.002693   | 0.010339 | LOC100129500 | APOE         | APOC1     |
| 908 | rs439401   | 19 | 45414451 | XL.HDL.TG | Small vessel disease   | 0.086072 | 0.01103 | 0.0657      | 0.039    | LOC100129500 | APOE         | APOC1     |
| 909 | rs439401   | 19 | 45414451 | XL.HDL.TG | Ischemic stroke        | 0.086072 | 0.01103 | 0.0117      | 0.0185   | LOC100129500 | APOE         | APOC1     |
| 910 | rs6073958  | 20 | 44551855 | XL.HDL.TG | Coronary heart disease | -0.14546 | 0.01232 | -0.025141   | 0.011769 |              | PLTP         | FLJ40606  |
| 911 | rs6073958  | 20 | 44585420 | XL.HDL.TG | Large vessel disease   | -0.14546 | 0.01232 | 0.041       | 0.0442   |              | PLTP         | FLJ40606  |
| 912 | rs6073958  | 20 | 44585420 | XL.HDL.TG | Small vessel disease   | -0.14546 | 0.01232 | 0.0586      | 0.0454   |              | PLTP         | FLJ40606  |
| 913 | rs6073958  | 20 | 44585420 | XL.HDL.TG | Cardioembolic stroke   | -0.14546 | 0.01232 | 0.0147      | 0.0415   |              | PLTP         | FLJ40606  |
| 914 | rs6073958  | 20 | 44585420 | XL.HDL.TG | Ischemic stroke        | -0.14546 | 0.01232 | 0.0042      | 0.0207   |              | PLTP         | FLJ40606  |
| 915 | rs6073958  | 20 | 44551855 | XL.HDL.TG | Myocardial infarction  | -0.14546 | 0.01232 | -0.0290105  | 0.012879 |              | PLTP         | FLJ40606  |
| 916 | rs61999891 | 15 | 58299599 | XL.HDL.TG | Myocardial infarction  | 0.12184  | 0.01731 | 0.00774116  | 0.016926 | ALDH1A2      | LOC100132719 | AQP9      |
| 917 | rs61999891 | 15 | 58299599 | XL.HDL.TG | Coronary heart disease | 0.12184  | 0.01731 | -0.022129   | 0.015103 | ALDH1A2      | LOC100132719 | AQP9      |
| 918 | rs72739708 | 15 | 57739519 | XL.HDL.TG | Cardioembolic stroke   | 0.113507 | 0.02057 | -0.0147     | 0.0906   |              |              |           |
| 919 | rs72739708 | 15 | 57739519 | XL.HDL.TG | Large vessel disease   | 0.113507 | 0.02057 | 0.0786      | 0.0962   |              |              |           |
| 920 | rs72739708 | 15 | 57739519 | XL.HDL.TG | Small vessel disease   | 0.113507 | 0.02057 | 0.1391      | 0.1067   |              |              |           |
| 921 | rs72739708 | 15 | 57733779 | XL.HDL.TG | Coronary heart disease | 0.113507 | 0.02057 | -0.013291   | 0.024874 |              |              |           |
| 922 | rs72739708 | 15 | 57739519 | XL.HDL.TG | Ischemic stroke        | 0.113507 | 0.02057 | 0.0697      | 0.0474   |              |              |           |
| 923 | rs72739708 | 15 | 57733779 | XL.HDL.TG | Myocardial infarction  | 0.113507 | 0.02057 | -0.00974298 | 0.028442 |              |              |           |
| 924 | rs73424577 | 15 | 58869185 | XL.HDL.TG | Coronary heart disease | 0.305039 | 0.02803 | 0.043542    | 0.027498 |              |              |           |
| 925 | rs73424577 | 15 | 58891114 | XL.HDL.TG | Ischemic stroke        | 0.305039 | 0.02803 | -0.0391     | 0.0532   |              |              |           |
| 926 | rs73424577 | 15 | 58891114 | XL.HDL.TG | Cardioembolic stroke   | 0.305039 | 0.02803 | 0.0994      | 0.0994   |              |              |           |

|     |             |    |           |            |                        |          |         |             |          |        |              |              |
|-----|-------------|----|-----------|------------|------------------------|----------|---------|-------------|----------|--------|--------------|--------------|
| 927 | rs73424577  | 15 | 58891114  | XL.HDL.TG  | Large vessel disease   | 0.305039 | 0.02803 | -0.0219     | 0.1133   |        |              |              |
| 928 | rs73424577  | 15 | 58891114  | XL.HDL.TG  | Small vessel disease   | 0.305039 | 0.02803 | 0.0052      | 0.1173   |        |              |              |
| 929 | rs73424577  | 15 | 58869185  | XL.HDL.TG  | Myocardial infarction  | 0.305039 | 0.02803 | 0.0282865   | 0.030666 |        |              |              |
| 930 | rs75679663  | 17 | 4667972   | XL.HDL.TG  | Coronary heart disease | -0.22505 | 0.03865 | -0.011031   | 0.066703 |        |              |              |
| 931 | rs75679663  | 17 | 4667972   | XL.HDL.TG  | Myocardial infarction  | -0.22505 | 0.03865 | 0.0280457   | 0.073714 |        |              |              |
| 932 | rs8100204   | 19 | 19393714  | XL.HDL.TG  | Coronary heart disease | -0.09559 | 0.01609 | -0.006372   | 0.01473  | SF4    | TM6SF2       | KIAA0892     |
| 933 | rs8100204   | 19 | 19393714  | XL.HDL.TG  | Myocardial infarction  | -0.09559 | 0.01609 | -0.00557434 | 0.016349 | SF4    | TM6SF2       | KIAA0892     |
| 934 | rs964184    | 11 | 116648917 | XL.HDL.TG  | Myocardial infarction  | -0.15467 | 0.01402 | -0.0487708  | 0.013873 | ZNF259 | BUD13        | ZNF259       |
| 935 | rs964184    | 11 | 116648917 | XL.HDL.TG  | Large vessel disease   | -0.15467 | 0.01402 | -0.0184     | 0.0505   | ZNF259 | BUD13        | ZNF259       |
| 936 | rs964184    | 11 | 116648917 | XL.HDL.TG  | Cardioembolic stroke   | -0.15467 | 0.01402 | -0.0127     | 0.0464   | ZNF259 | BUD13        | ZNF259       |
| 937 | rs964184    | 11 | 116648917 | XL.HDL.TG  | Small vessel disease   | -0.15467 | 0.01402 | -0.0253     | 0.0533   | ZNF259 | BUD13        | ZNF259       |
| 938 | rs964184    | 11 | 116648917 | XL.HDL.TG  | Ischemic stroke        | -0.15467 | 0.01402 | -0.0074     | 0.024    | ZNF259 | BUD13        | ZNF259       |
| 939 | rs964184    | 11 | 116648917 | XL.HDL.TG  | Coronary heart disease | -0.15467 | 0.01402 | -0.049958   | 0.012399 | ZNF259 | BUD13        | ZNF259       |
| 940 | rs97384     | 11 | 61624181  | XL.HDL.TG  | Myocardial infarction  | 0.083919 | 0.01036 | 0.0191417   | 0.011688 | FADS2  | LOC100131326 | FADS3        |
| 941 | rs97384     | 11 | 61624181  | XL.HDL.TG  | Coronary heart disease | 0.083919 | 0.01036 | 0.019915    | 0.010502 | FADS2  | LOC100131326 | FADS3        |
| 942 | rs10455872  | 6  | 161010118 | XL.VLDL.TG | Cardioembolic stroke   | -0.18067 | 0.02784 | 0.0167      | 0.0957   | LPA    | LPAL2        | PLG          |
| 943 | rs10455872  | 6  | 161010118 | XL.VLDL.TG | Ischemic stroke        | -0.18067 | 0.02784 | 0.0418      | 0.045    | LPA    | LPAL2        | PLG          |
| 944 | rs10455872  | 6  | 161010118 | XL.VLDL.TG | Large vessel disease   | -0.18067 | 0.02784 | 0.227       | 0.0906   | LPA    | LPAL2        | PLG          |
| 945 | rs10455872  | 6  | 161010118 | XL.VLDL.TG | Myocardial infarction  | -0.18067 | 0.02784 | 0.284774    | 0.026592 | LPA    | LPAL2        | PLG          |
| 946 | rs10455872  | 6  | 161010118 | XL.VLDL.TG | Coronary heart disease | -0.18067 | 0.02784 | 0.318598    | 0.024399 | LPA    | LPAL2        | PLG          |
| 947 | rs10455872  | 6  | 161010118 | XL.VLDL.TG | Small vessel disease   | -0.18067 | 0.02784 | -0.0807     | 0.1015   | LPA    | LPAL2        | PLG          |
| 948 | rs1168041   | 1  | 62960250  | XL.VLDL.TG | Small vessel disease   | 0.083991 | 0.0112  | -0.0781     | 0.0389   | DOCK7  | USP1         | ANGPTL3      |
| 949 | rs1168041   | 1  | 62960250  | XL.VLDL.TG | Ischemic stroke        | 0.083991 | 0.0112  | -0.0095     | 0.0178   | DOCK7  | USP1         | ANGPTL3      |
| 950 | rs1168041   | 1  | 62960250  | XL.VLDL.TG | Myocardial infarction  | 0.083991 | 0.0112  | 0.00067632  | 0.011148 | DOCK7  | USP1         | ANGPTL3      |
| 951 | rs1168041   | 1  | 62960250  | XL.VLDL.TG | Coronary heart disease | 0.083991 | 0.0112  | 0.011014    | 0.01011  | DOCK7  | USP1         | ANGPTL3      |
| 952 | rs1168041   | 1  | 62960250  | XL.VLDL.TG | Large vessel disease   | 0.083991 | 0.0112  | -0.0152     | 0.0373   | DOCK7  | USP1         | ANGPTL3      |
| 953 | rs1168041   | 1  | 62960250  | XL.VLDL.TG | Cardioembolic stroke   | 0.083991 | 0.0112  | -0.0236     | 0.0353   | DOCK7  | USP1         | ANGPTL3      |
| 954 | rs1260326   | 2  | 27730940  | XL.VLDL.TG | Large vessel disease   | -0.093   | 0.01019 | 0.0392      | 0.0341   | GCKR   | FNDC4        | LOC100130981 |
| 955 | rs1260326   | 2  | 27730940  | XL.VLDL.TG | Cardioembolic stroke   | -0.093   | 0.01019 | 0.0401      | 0.0314   | GCKR   | FNDC4        | LOC100130981 |
| 956 | rs1260326   | 2  | 27730940  | XL.VLDL.TG | Coronary heart disease | -0.093   | 0.01019 | 0.003257    | 0.00962  | GCKR   | FNDC4        | LOC100130981 |
| 957 | rs1260326   | 2  | 27730940  | XL.VLDL.TG | Small vessel disease   | -0.093   | 0.01019 | -0.0441     | 0.0353   | GCKR   | FNDC4        | LOC100130981 |
| 958 | rs1260326   | 2  | 27730940  | XL.VLDL.TG | Myocardial infarction  | -0.093   | 0.01019 | 0.00111651  | 0.010666 | GCKR   | FNDC4        | LOC100130981 |
| 959 | rs1260326   | 2  | 27730940  | XL.VLDL.TG | Ischemic stroke        | -0.093   | 0.01019 | 0.012       | 0.0162   | GCKR   | FNDC4        | LOC100130981 |
| 960 | rs13234157  | 7  | 72971728  | XL.VLDL.TG | Myocardial infarction  | -0.1113  | 0.01516 | 0.00644804  | 0.016555 | BCL7B  | BAZ1B        | TBL2         |
| 961 | rs13234157  | 7  | 72971728  | XL.VLDL.TG | Coronary heart disease | -0.1113  | 0.01516 | 0.005225    | 0.014834 | BCL7B  | BAZ1B        | TBL2         |
| 962 | rs13234157  | 7  | 72982874  | XL.VLDL.TG | Ischemic stroke        | -0.1113  | 0.01516 | 0.0184      | 0.0252   | BCL7B  | BAZ1B        | TBL2         |
| 963 | rs13234157  | 7  | 72982874  | XL.VLDL.TG | Small vessel disease   | -0.1113  | 0.01516 | 0.0089      | 0.0557   | BCL7B  | BAZ1B        | TBL2         |
| 964 | rs13234157  | 7  | 72982874  | XL.VLDL.TG | Large vessel disease   | -0.1113  | 0.01516 | 0.0049      | 0.0546   | BCL7B  | BAZ1B        | TBL2         |
| 965 | rs13234157  | 7  | 72982874  | XL.VLDL.TG | Cardioembolic stroke   | -0.1113  | 0.01516 | 0.0395      | 0.0502   | BCL7B  | BAZ1B        | TBL2         |
| 966 | rs186696265 | 6  | 161111700 | XL.VLDL.TG | Myocardial infarction  | -0.32556 | 0.05743 | 0.529852    | 0.052599 |        |              |              |
| 967 | rs186696265 | 6  | 161111700 | XL.VLDL.TG | Coronary heart disease | -0.32556 | 0.05743 | 0.550351    | 0.048195 |        |              |              |

|      |             |    |           |            |                        |          |         |            |          |              |         |              |
|------|-------------|----|-----------|------------|------------------------|----------|---------|------------|----------|--------------|---------|--------------|
| 968  | rs4296389   | 2  | 21142994  | XL.VLDL.TG | Myocardial infarction  | -0.05923 | 0.01053 | -0.0112562 | 0.01124  |              | C2orf43 | APOB         |
| 969  | rs4296389   | 2  | 21142994  | XL.VLDL.TG | Coronary heart disease | -0.05923 | 0.01053 | -0.012159  | 0.010207 |              | C2orf43 | APOB         |
| 970  | rs438811    | 19 | 45416741  | XL.VLDL.TG | Myocardial infarction  | 0.080558 | 0.01285 | 0.0249193  | 0.014388 | LOC100129500 | APOE    | APOC1        |
| 971  | rs438811    | 19 | 45416741  | XL.VLDL.TG | Coronary heart disease | 0.080558 | 0.01285 | 0.013252   | 0.012834 | LOC100129500 | APOE    | APOC1        |
| 972  | rs72999033  | 19 | 19407718  | XL.VLDL.TG | Cardioembolic stroke   | -0.14446 | 0.0223  | 0.0972     | 0.0645   |              |         |              |
| 973  | rs72999033  | 19 | 19407718  | XL.VLDL.TG | Small vessel disease   | -0.14446 | 0.0223  | 0.0398     | 0.0744   |              |         |              |
| 974  | rs72999033  | 19 | 19366632  | XL.VLDL.TG | Myocardial infarction  | -0.14446 | 0.0223  | -0.0370382 | 0.023873 |              |         |              |
| 975  | rs72999033  | 19 | 19366632  | XL.VLDL.TG | Coronary heart disease | -0.14446 | 0.0223  | -0.051959  | 0.021377 |              |         |              |
| 976  | rs72999033  | 19 | 19407718  | XL.VLDL.TG | Large vessel disease   | -0.14446 | 0.0223  | 0.1255     | 0.0702   |              |         |              |
| 977  | rs72999033  | 19 | 19407718  | XL.VLDL.TG | Ischemic stroke        | -0.14446 | 0.0223  | 0.0212     | 0.0335   |              |         |              |
| 978  | rs76975037  | 8  | 19851508  | XL.VLDL.TG | Myocardial infarction  | -0.12553 | 0.0174  | -0.0665203 | 0.017954 |              |         |              |
| 979  | rs76975037  | 8  | 19851508  | XL.VLDL.TG | Coronary heart disease | -0.12553 | 0.0174  | -0.053571  | 0.016022 |              |         |              |
| 980  | rs76975037  | 8  | 19852134  | XL.VLDL.TG | Ischemic stroke        | -0.12553 | 0.0174  | 0.0376     | 0.0262   |              |         |              |
| 981  | rs76975037  | 8  | 19852134  | XL.VLDL.TG | Small vessel disease   | -0.12553 | 0.0174  | 0.0289     | 0.0596   |              |         |              |
| 982  | rs76975037  | 8  | 19852134  | XL.VLDL.TG | Large vessel disease   | -0.12553 | 0.0174  | 0.0167     | 0.0536   |              |         |              |
| 983  | rs76975037  | 8  | 19852134  | XL.VLDL.TG | Cardioembolic stroke   | -0.12553 | 0.0174  | 0.0885     | 0.0497   |              |         |              |
| 984  | rs964184    | 11 | 116648917 | XL.VLDL.TG | Small vessel disease   | -0.17881 | 0.01398 | -0.0253    | 0.0533   | ZNF259       | BUD13   | ZNF259       |
| 985  | rs964184    | 11 | 116648917 | XL.VLDL.TG | Large vessel disease   | -0.17881 | 0.01398 | -0.0184    | 0.0505   | ZNF259       | BUD13   | ZNF259       |
| 986  | rs964184    | 11 | 116648917 | XL.VLDL.TG | Cardioembolic stroke   | -0.17881 | 0.01398 | -0.0127    | 0.0464   | ZNF259       | BUD13   | ZNF259       |
| 987  | rs964184    | 11 | 116648917 | XL.VLDL.TG | Coronary heart disease | -0.17881 | 0.01398 | -0.049958  | 0.012399 | ZNF259       | BUD13   | ZNF259       |
| 988  | rs964184    | 11 | 116648917 | XL.VLDL.TG | Ischemic stroke        | -0.17881 | 0.01398 | -0.0074    | 0.024    | ZNF259       | BUD13   | ZNF259       |
| 989  | rs964184    | 11 | 116648917 | XL.VLDL.TG | Myocardial infarction  | -0.17881 | 0.01398 | -0.0487708 | 0.013873 | ZNF259       | BUD13   | ZNF259       |
| 990  | rs113531395 | 17 | 4886829   | XS.VLDL.TG | Coronary heart disease | -0.21548 | 0.03635 | -0.046539  | 0.061719 |              |         |              |
| 991  | rs113531395 | 17 | 4886829   | XS.VLDL.TG | Myocardial infarction  | -0.21548 | 0.03635 | -0.0573797 | 0.067105 |              |         |              |
| 992  | rs115849089 | 8  | 19912370  | XS.VLDL.TG | Coronary heart disease | -0.15619 | 0.01718 | -0.057989  | 0.015294 |              |         |              |
| 993  | rs115849089 | 8  | 19912370  | XS.VLDL.TG | Myocardial infarction  | -0.15619 | 0.01718 | -0.0667741 | 0.017021 |              |         |              |
| 994  | rs1168041   | 1  | 62960250  | XS.VLDL.TG | Coronary heart disease | 0.093589 | 0.01174 | 0.011014   | 0.01011  | DOCK7        | USP1    | ANGPTL3      |
| 995  | rs1168041   | 1  | 62960250  | XS.VLDL.TG | Myocardial infarction  | 0.093589 | 0.01174 | 0.00067632 | 0.011148 | DOCK7        | USP1    | ANGPTL3      |
| 996  | rs1168041   | 1  | 62960250  | XS.VLDL.TG | Cardioembolic stroke   | 0.093589 | 0.01174 | -0.0236    | 0.0353   | DOCK7        | USP1    | ANGPTL3      |
| 997  | rs1168041   | 1  | 62960250  | XS.VLDL.TG | Ischemic stroke        | 0.093589 | 0.01174 | -0.0095    | 0.0178   | DOCK7        | USP1    | ANGPTL3      |
| 998  | rs1168041   | 1  | 62960250  | XS.VLDL.TG | Large vessel disease   | 0.093589 | 0.01174 | -0.0152    | 0.0373   | DOCK7        | USP1    | ANGPTL3      |
| 999  | rs1168041   | 1  | 62960250  | XS.VLDL.TG | Small vessel disease   | 0.093589 | 0.01174 | -0.0781    | 0.0389   | DOCK7        | USP1    | ANGPTL3      |
| 1000 | rs1260326   | 2  | 27730940  | XS.VLDL.TG | Ischemic stroke        | -0.08106 | 0.01065 | 0.012      | 0.0162   | GCKR         | FNDC4   | LOC100130981 |
| 1001 | rs1260326   | 2  | 27730940  | XS.VLDL.TG | Myocardial infarction  | -0.08106 | 0.01065 | 0.00111651 | 0.010666 | GCKR         | FNDC4   | LOC100130981 |
| 1002 | rs1260326   | 2  | 27730940  | XS.VLDL.TG | Cardioembolic stroke   | -0.08106 | 0.01065 | 0.0401     | 0.0314   | GCKR         | FNDC4   | LOC100130981 |
| 1003 | rs1260326   | 2  | 27730940  | XS.VLDL.TG | Small vessel disease   | -0.08106 | 0.01065 | -0.0441    | 0.0353   | GCKR         | FNDC4   | LOC100130981 |
| 1004 | rs1260326   | 2  | 27730940  | XS.VLDL.TG | Large vessel disease   | -0.08106 | 0.01065 | 0.0392     | 0.0341   | GCKR         | FNDC4   | LOC100130981 |
| 1005 | rs1260326   | 2  | 27730940  | XS.VLDL.TG | Coronary heart disease | -0.08106 | 0.01065 | 0.003257   | 0.00962  | GCKR         | FNDC4   | LOC100130981 |
| 1006 | rs144064722 | 4  | 73406173  | XS.VLDL.TG | Coronary heart disease | 0.202156 | 0.0341  | 0.028313   | 0.031588 |              |         |              |
| 1007 | rs144064722 | 4  | 73406173  | XS.VLDL.TG | Myocardial infarction  | 0.202156 | 0.0341  | 0.032534   | 0.034056 |              |         |              |
| 1008 | rs157594    | 19 | 45425175  | XS.VLDL.TG | Coronary heart disease | 0.11115  | 0.01174 | 0.021906   | 0.011888 | LOC100129500 | APOC1   | APOC4        |

|      |            |    |          |            |                        |          |         |             |          |              |              |           |
|------|------------|----|----------|------------|------------------------|----------|---------|-------------|----------|--------------|--------------|-----------|
| 1009 | rs157594   | 19 | 45425175 | XS.VLDL.TG | Myocardial infarction  | 0.11115  | 0.01174 | 0.0265114   | 0.013237 | LOC100129500 | APOC1        | APOC4     |
| 1010 | rs174418   | 15 | 58687603 | XS.VLDL.TG | Myocardial infarction  | -0.08787 | 0.01048 | -0.00891688 | 0.010502 |              | LOC441726    | LIPC      |
| 1011 | rs174418   | 15 | 58687603 | XS.VLDL.TG | Coronary heart disease | -0.08787 | 0.01048 | -0.011405   | 0.009419 |              | LOC441726    | LIPC      |
| 1012 | rs1848922  | 2  | 21471603 | XS.VLDL.TG | Coronary heart disease | 0.092776 | 0.0126  | 0.047369    | 0.011832 |              | LOC100129278 | LOC645949 |
| 1013 | rs1848922  | 2  | 21471603 | XS.VLDL.TG | Myocardial infarction  | 0.092776 | 0.0126  | 0.0301768   | 0.013003 |              | LOC100129278 | LOC645949 |
| 1014 | rs1883711  | 20 | 39179822 | XS.VLDL.TG | Myocardial infarction  | 0.148584 | 0.02474 | 0.0985739   | 0.040277 |              | HSPEP1       | MAFB      |
| 1015 | rs1883711  | 20 | 39179822 | XS.VLDL.TG | Coronary heart disease | 0.148584 | 0.02474 | 0.133601    | 0.034913 |              | HSPEP1       | MAFB      |
| 1016 | rs1883711  | 20 | 39179822 | XS.VLDL.TG | Cardioembolic stroke   | 0.148584 | 0.02474 | 0.178       | 0.205    |              | HSPEP1       | MAFB      |
| 1017 | rs2044332  | 15 | 58646641 | XS.VLDL.TG | Myocardial infarction  | 0.092618 | 0.01526 | -0.00567182 | 0.014995 |              | LOC441726    | LIPC      |
| 1018 | rs2044332  | 15 | 58646641 | XS.VLDL.TG | Coronary heart disease | 0.092618 | 0.01526 | 0.005484    | 0.013358 |              | LOC441726    | LIPC      |
| 1019 | rs247617   | 16 | 56990716 | XS.VLDL.TG | Myocardial infarction  | -0.11588 | 0.01146 | -0.0261377  | 0.011415 |              | HERPUD1      | CETP      |
| 1020 | rs247617   | 16 | 56993324 | XS.VLDL.TG | Large vessel disease   | -0.11588 | 0.01146 | 0.0256      | 0.0369   |              | HERPUD1      | CETP      |
| 1021 | rs247617   | 16 | 56993324 | XS.VLDL.TG | Ischemic stroke        | -0.11588 | 0.01146 | 0.0102      | 0.0175   |              | HERPUD1      | CETP      |
| 1022 | rs247617   | 16 | 56993324 | XS.VLDL.TG | Cardioembolic stroke   | -0.11588 | 0.01146 | 0.0074      | 0.0345   |              | HERPUD1      | CETP      |
| 1023 | rs247617   | 16 | 56990716 | XS.VLDL.TG | Coronary heart disease | -0.11588 | 0.01146 | -0.030884   | 0.010212 |              | HERPUD1      | CETP      |
| 1024 | rs247617   | 16 | 56993324 | XS.VLDL.TG | Small vessel disease   | -0.11588 | 0.01146 | 0.0027      | 0.0382   |              | HERPUD1      | CETP      |
| 1025 | rs261334   | 15 | 58726744 | XS.VLDL.TG | Cardioembolic stroke   | -0.11838 | 0.01232 | 0.0623      | 0.0423   | LIPC         | LOC441726    | ADAM10    |
| 1026 | rs261334   | 15 | 58726744 | XS.VLDL.TG | Ischemic stroke        | -0.11838 | 0.01232 | 0.0383      | 0.0211   | LIPC         | LOC441726    | ADAM10    |
| 1027 | rs261334   | 15 | 58726744 | XS.VLDL.TG | Large vessel disease   | -0.11838 | 0.01232 | 0.0677      | 0.0452   | LIPC         | LOC441726    | ADAM10    |
| 1028 | rs261334   | 15 | 58726744 | XS.VLDL.TG | Myocardial infarction  | -0.11838 | 0.01232 | -0.0402744  | 0.012395 | LIPC         | LOC441726    | ADAM10    |
| 1029 | rs261334   | 15 | 58726744 | XS.VLDL.TG | Small vessel disease   | -0.11838 | 0.01232 | -0.0739     | 0.0451   | LIPC         | LOC441726    | ADAM10    |
| 1030 | rs261334   | 15 | 58726744 | XS.VLDL.TG | Coronary heart disease | -0.11838 | 0.01232 | -0.03756    | 0.011043 | LIPC         | LOC441726    | ADAM10    |
| 1031 | rs2878419  | 5  | 74655726 | XS.VLDL.TG | Large vessel disease   | 0.060999 | 0.01045 | -0.0577     | 0.0357   | HMGCR        | LOC728775    | COL4A3BP  |
| 1032 | rs2878419  | 5  | 74640490 | XS.VLDL.TG | Coronary heart disease | 0.060999 | 0.01045 | 0.030809    | 0.009553 | HMGCR        | LOC728775    | COL4A3BP  |
| 1033 | rs2878419  | 5  | 74655726 | XS.VLDL.TG | Small vessel disease   | 0.060999 | 0.01045 | 0.0513      | 0.0371   | HMGCR        | LOC728775    | COL4A3BP  |
| 1034 | rs2878419  | 5  | 74655726 | XS.VLDL.TG | Ischemic stroke        | 0.060999 | 0.01045 | -0.0123     | 0.0168   | HMGCR        | LOC728775    | COL4A3BP  |
| 1035 | rs2878419  | 5  | 74655726 | XS.VLDL.TG | Cardioembolic stroke   | 0.060999 | 0.01045 | -0.0077     | 0.033    | HMGCR        | LOC728775    | COL4A3BP  |
| 1036 | rs2878419  | 5  | 74640490 | XS.VLDL.TG | Myocardial infarction  | 0.060999 | 0.01045 | 0.0311687   | 0.010473 | HMGCR        | LOC728775    | COL4A3BP  |
|      |            |    |          |            |                        |          |         |             |          | MLXIPL       |              |           |
|      |            |    |          |            |                        |          |         |             |          | MLXIPL       |              |           |
| 1037 | rs34346326 | 7  | 73016181 | XS.VLDL.TG | Coronary heart disease | -0.07646 | 0.01367 | -0.010364   | 0.012808 | MLXIPL       | TBL2         | VPS37D    |
|      |            |    |          |            |                        |          |         |             |          | MLXIPL       |              |           |
|      |            |    |          |            |                        |          |         |             |          | MLXIPL       |              |           |
| 1038 | rs34346326 | 7  | 73016181 | XS.VLDL.TG | Myocardial infarction  | -0.07646 | 0.01367 | -0.00956639 | 0.014338 | MLXIPL       | TBL2         | VPS37D    |
| 1039 | rs4609471  | 1  | 55493584 | XS.VLDL.TG | Coronary heart disease | -0.17343 | 0.02981 | -0.088176   | 0.037828 |              | BSND         | PCSK9     |
| 1040 | rs4609471  | 1  | 55493584 | XS.VLDL.TG | Myocardial infarction  | -0.17343 | 0.02981 | -0.110147   | 0.042779 |              | BSND         | PCSK9     |
| 1041 | rs58542926 | 19 | 19610596 | XS.VLDL.TG | Small vessel disease   | -0.15327 | 0.02107 | 0.0136      | 0.0675   | TM6SF2       | HAPLN4       | SF4       |
| 1042 | rs58542926 | 19 | 19379549 | XS.VLDL.TG | Myocardial infarction  | -0.15327 | 0.02107 | -0.0459691  | 0.020412 | TM6SF2       | HAPLN4       | SF4       |
| 1043 | rs58542926 | 19 | 19610596 | XS.VLDL.TG | Cardioembolic stroke   | -0.15327 | 0.02107 | 0.1322      | 0.0595   | TM6SF2       | HAPLN4       | SF4       |
| 1044 | rs58542926 | 19 | 19610596 | XS.VLDL.TG | Large vessel disease   | -0.15327 | 0.02107 | 0.0518      | 0.0641   | TM6SF2       | HAPLN4       | SF4       |
| 1045 | rs58542926 | 19 | 19379549 | XS.VLDL.TG | Coronary heart disease | -0.15327 | 0.02107 | -0.051253   | 0.018343 | TM6SF2       | HAPLN4       | SF4       |

|      |            |    |           |             |                        |          |         |            |          |        |         |              |
|------|------------|----|-----------|-------------|------------------------|----------|---------|------------|----------|--------|---------|--------------|
| 1046 | rs58542926 | 19 | 19610596  | XS.VLDL.TG  | Ischemic stroke        | -0.15327 | 0.02107 | 0.0224     | 0.0304   | TM6SF2 | HAPLN4  | SF4          |
| 1047 | rs6511720  | 19 | 11202306  | XS.VLDL.TG  | Small vessel disease   | -0.14492 | 0.01736 | -0.013     | 0.0549   | LDLR   | SMARCA4 | SPC24        |
| 1048 | rs6511720  | 19 | 11202306  | XS.VLDL.TG  | Large vessel disease   | -0.14492 | 0.01736 | -0.0924    | 0.0525   | LDLR   | SMARCA4 | SPC24        |
| 1049 | rs6511720  | 19 | 11202306  | XS.VLDL.TG  | Cardioembolic stroke   | -0.14492 | 0.01736 | -0.0567    | 0.048    | LDLR   | SMARCA4 | SPC24        |
| 1050 | rs6511720  | 19 | 11202306  | XS.VLDL.TG  | Ischemic stroke        | -0.14492 | 0.01736 | -0.0708    | 0.0249   | LDLR   | SMARCA4 | SPC24        |
| 1051 | rs6511720  | 19 | 11202306  | XS.VLDL.TG  | Myocardial infarction  | -0.14492 | 0.01736 | -0.100786  | 0.01894  | LDLR   | SMARCA4 | SPC24        |
| 1052 | rs6511720  | 19 | 11202306  | XS.VLDL.TG  | Coronary heart disease | -0.14492 | 0.01736 | -0.125298  | 0.016945 | LDLR   | SMARCA4 | SPC24        |
| 1053 | rs6544366  | 2  | 21204025  | XS.VLDL.TG  | Myocardial infarction  | -0.12061 | 0.01144 | -0.0116187 | 0.01142  |        | C2orf43 | APOB         |
| 1054 | rs6544366  | 2  | 21204025  | XS.VLDL.TG  | Large vessel disease   | -0.12061 | 0.01144 | 0.0118     | 0.0407   |        | C2orf43 | APOB         |
| 1055 | rs6544366  | 2  | 21204025  | XS.VLDL.TG  | Coronary heart disease | -0.12061 | 0.01144 | -0.003091  | 0.0103   |        | C2orf43 | APOB         |
| 1056 | rs6544366  | 2  | 21204025  | XS.VLDL.TG  | Cardioembolic stroke   | -0.12061 | 0.01144 | -0.0062    | 0.0377   |        | C2orf43 | APOB         |
| 1057 | rs6544366  | 2  | 21204025  | XS.VLDL.TG  | Small vessel disease   | -0.12061 | 0.01144 | 0.0259     | 0.0416   |        | C2orf43 | APOB         |
| 1058 | rs6544366  | 2  | 21204025  | XS.VLDL.TG  | Ischemic stroke        | -0.12061 | 0.01144 | 0.0109     | 0.0188   |        | C2orf43 | APOB         |
| 1059 | rs72660594 | 1  | 55636240  | XS.VLDL.TG  | Coronary heart disease | -0.20082 | 0.02886 | -0.080262  | 0.046373 |        |         |              |
| 1060 | rs72660594 | 1  | 55636240  | XS.VLDL.TG  | Myocardial infarction  | -0.20082 | 0.02886 | -0.0986201 | 0.051013 |        |         |              |
| 1061 | rs964184   | 11 | 116648917 | XS.VLDL.TG  | Small vessel disease   | -0.21633 | 0.01453 | -0.0253    | 0.0533   | ZNF259 | BUD13   | ZNF259       |
| 1062 | rs964184   | 11 | 116648917 | XS.VLDL.TG  | Myocardial infarction  | -0.21633 | 0.01453 | -0.0487708 | 0.013873 | ZNF259 | BUD13   | ZNF259       |
| 1063 | rs964184   | 11 | 116648917 | XS.VLDL.TG  | Cardioembolic stroke   | -0.21633 | 0.01453 | -0.0127    | 0.0464   | ZNF259 | BUD13   | ZNF259       |
| 1064 | rs964184   | 11 | 116648917 | XS.VLDL.TG  | Coronary heart disease | -0.21633 | 0.01453 | -0.049958  | 0.012399 | ZNF259 | BUD13   | ZNF259       |
| 1065 | rs964184   | 11 | 116648917 | XS.VLDL.TG  | Large vessel disease   | -0.21633 | 0.01453 | -0.0184    | 0.0505   | ZNF259 | BUD13   | ZNF259       |
| 1066 | rs964184   | 11 | 116648917 | XS.VLDL.TG  | Ischemic stroke        | -0.21633 | 0.01453 | -0.0074    | 0.024    | ZNF259 | BUD13   | ZNF259       |
| 1067 | rs10455872 | 6  | 161010118 | XXL.VLDL.TG | Large vessel disease   | -0.19364 | 0.02787 | 0.227      | 0.0906   | LPA    | LPAL2   | PLG          |
| 1068 | rs10455872 | 6  | 161010118 | XXL.VLDL.TG | Myocardial infarction  | -0.19364 | 0.02787 | 0.284774   | 0.026592 | LPA    | LPAL2   | PLG          |
| 1069 | rs10455872 | 6  | 161010118 | XXL.VLDL.TG | Coronary heart disease | -0.19364 | 0.02787 | 0.318598   | 0.024399 | LPA    | LPAL2   | PLG          |
| 1070 | rs10455872 | 6  | 161010118 | XXL.VLDL.TG | Ischemic stroke        | -0.19364 | 0.02787 | 0.0418     | 0.045    | LPA    | LPAL2   | PLG          |
| 1071 | rs10455872 | 6  | 161010118 | XXL.VLDL.TG | Cardioembolic stroke   | -0.19364 | 0.02787 | 0.0167     | 0.0957   | LPA    | LPAL2   | PLG          |
| 1072 | rs10455872 | 6  | 161010118 | XXL.VLDL.TG | Small vessel disease   | -0.19364 | 0.02787 | -0.0807    | 0.1015   | LPA    | LPAL2   | PLG          |
| 1073 | rs1168041  | 1  | 62960250  | XXL.VLDL.TG | Myocardial infarction  | 0.077153 | 0.01121 | 0.00067632 | 0.011148 | DOCK7  | USP1    | ANGPTL3      |
| 1074 | rs1168041  | 1  | 62960250  | XXL.VLDL.TG | Coronary heart disease | 0.077153 | 0.01121 | 0.011014   | 0.01011  | DOCK7  | USP1    | ANGPTL3      |
| 1075 | rs1168041  | 1  | 62960250  | XXL.VLDL.TG | Ischemic stroke        | 0.077153 | 0.01121 | -0.0095    | 0.0178   | DOCK7  | USP1    | ANGPTL3      |
| 1076 | rs1168041  | 1  | 62960250  | XXL.VLDL.TG | Small vessel disease   | 0.077153 | 0.01121 | -0.0781    | 0.0389   | DOCK7  | USP1    | ANGPTL3      |
| 1077 | rs1168041  | 1  | 62960250  | XXL.VLDL.TG | Large vessel disease   | 0.077153 | 0.01121 | -0.0152    | 0.0373   | DOCK7  | USP1    | ANGPTL3      |
| 1078 | rs1168041  | 1  | 62960250  | XXL.VLDL.TG | Cardioembolic stroke   | 0.077153 | 0.01121 | -0.0236    | 0.0353   | DOCK7  | USP1    | ANGPTL3      |
| 1079 | rs1260326  | 2  | 27730940  | XXL.VLDL.TG | Cardioembolic stroke   | -0.09349 | 0.01021 | 0.0401     | 0.0314   | GCKR   | FNDC4   | LOC100130981 |
| 1080 | rs1260326  | 2  | 27730940  | XXL.VLDL.TG | Ischemic stroke        | -0.09349 | 0.01021 | 0.012      | 0.0162   | GCKR   | FNDC4   | LOC100130981 |
| 1081 | rs1260326  | 2  | 27730940  | XXL.VLDL.TG | Large vessel disease   | -0.09349 | 0.01021 | 0.0392     | 0.0341   | GCKR   | FNDC4   | LOC100130981 |
| 1082 | rs1260326  | 2  | 27730940  | XXL.VLDL.TG | Coronary heart disease | -0.09349 | 0.01021 | 0.003257   | 0.00962  | GCKR   | FNDC4   | LOC100130981 |
| 1083 | rs1260326  | 2  | 27730940  | XXL.VLDL.TG | Myocardial infarction  | -0.09349 | 0.01021 | 0.00111651 | 0.010666 | GCKR   | FNDC4   | LOC100130981 |
| 1084 | rs1260326  | 2  | 27730940  | XXL.VLDL.TG | Small vessel disease   | -0.09349 | 0.01021 | -0.0441    | 0.0353   | GCKR   | FNDC4   | LOC100130981 |
| 1085 | rs13233571 | 7  | 72971231  | XXL.VLDL.TG | Myocardial infarction  | -0.09437 | 0.01519 | 0.00652852 | 0.016594 | BCL7B  | BAZ1B   | TBL2         |
| 1086 | rs13233571 | 7  | 72971231  | XXL.VLDL.TG | Large vessel disease   | -0.09437 | 0.01519 | 0.0028     | 0.0547   | BCL7B  | BAZ1B   | TBL2         |

|      |            |    |           |             |                        |          |         |            |          |        |         |        |
|------|------------|----|-----------|-------------|------------------------|----------|---------|------------|----------|--------|---------|--------|
| 1087 | rs13233571 | 7  | 72971231  | XXL.VLDL.TG | Small vessel disease   | -0.09437 | 0.01519 | 0.0093     | 0.0568   | BCL7B  | BAZ1B   | TBL2   |
| 1088 | rs13233571 | 7  | 72971231  | XXL.VLDL.TG | Ischemic stroke        | -0.09437 | 0.01519 | 0.0371     | 0.0253   | BCL7B  | BAZ1B   | TBL2   |
| 1089 | rs13233571 | 7  | 72971231  | XXL.VLDL.TG | Cardioembolic stroke   | -0.09437 | 0.01519 | 0.0631     | 0.05     | BCL7B  | BAZ1B   | TBL2   |
| 1090 | rs13233571 | 7  | 72971231  | XXL.VLDL.TG | Coronary heart disease | -0.09437 | 0.01519 | 0.00613    | 0.014865 | BCL7B  | BAZ1B   | TBL2   |
| 1091 | rs483082   | 19 | 45416178  | XXL.VLDL.TG | Myocardial infarction  | 0.0972   | 0.01209 | 0.0237461  | 0.014422 | APOC1  | APOE    | APOC1  |
| 1092 | rs483082   | 19 | 45416178  | XXL.VLDL.TG | Coronary heart disease | 0.0972   | 0.01209 | 0.011561   | 0.012875 | APOC1  | APOE    | APOC1  |
| 1093 | rs72999033 | 19 | 19407718  | XXL.VLDL.TG | Ischemic stroke        | -0.12619 | 0.02101 | 0.0212     | 0.0335   |        |         |        |
| 1094 | rs72999033 | 19 | 19407718  | XXL.VLDL.TG | Large vessel disease   | -0.12619 | 0.02101 | 0.1255     | 0.0702   |        |         |        |
| 1095 | rs72999033 | 19 | 19366632  | XXL.VLDL.TG | Coronary heart disease | -0.12619 | 0.02101 | -0.051959  | 0.021377 |        |         |        |
| 1096 | rs72999033 | 19 | 19407718  | XXL.VLDL.TG | Small vessel disease   | -0.12619 | 0.02101 | 0.0398     | 0.0744   |        |         |        |
| 1097 | rs72999033 | 19 | 19366632  | XXL.VLDL.TG | Myocardial infarction  | -0.12619 | 0.02101 | -0.0370382 | 0.023873 |        |         |        |
| 1098 | rs72999033 | 19 | 19407718  | XXL.VLDL.TG | Cardioembolic stroke   | -0.12619 | 0.02101 | 0.0972     | 0.0645   |        |         |        |
| 1099 | rs77729186 | 8  | 19844222  | XXL.VLDL.TG | Cardioembolic stroke   | -0.11594 | 0.01693 | 0.0785     | 0.0518   |        |         |        |
| 1100 | rs77729186 | 8  | 19844222  | XXL.VLDL.TG | Ischemic stroke        | -0.11594 | 0.01693 | 0.0319     | 0.027    |        |         |        |
| 1101 | rs77729186 | 8  | 19826318  | XXL.VLDL.TG | Coronary heart disease | -0.11594 | 0.01693 | -0.051641  | 0.015873 |        |         |        |
| 1102 | rs77729186 | 8  | 19844222  | XXL.VLDL.TG | Small vessel disease   | -0.11594 | 0.01693 | 0.0113     | 0.0612   |        |         |        |
| 1103 | rs77729186 | 8  | 19844222  | XXL.VLDL.TG | Large vessel disease   | -0.11594 | 0.01693 | -0.0069    | 0.0559   |        |         |        |
| 1104 | rs77729186 | 8  | 19826318  | XXL.VLDL.TG | Myocardial infarction  | -0.11594 | 0.01693 | -0.0663204 | 0.017713 |        |         |        |
| 1105 | rs821840   | 16 | 56993886  | XXL.VLDL.TG | Coronary heart disease | -0.06546 | 0.01164 | -0.040648  | 0.011129 | CETP   | HERPUD1 | CETP   |
| 1106 | rs821840   | 16 | 56993886  | XXL.VLDL.TG | Myocardial infarction  | -0.06546 | 0.01164 | -0.0346335 | 0.012304 | CETP   | HERPUD1 | CETP   |
| 1107 | rs964184   | 11 | 116648917 | XXL.VLDL.TG | Large vessel disease   | -0.1529  | 0.01401 | -0.0184    | 0.0505   | ZNF259 | BUD13   | ZNF259 |
| 1108 | rs964184   | 11 | 116648917 | XXL.VLDL.TG | Ischemic stroke        | -0.1529  | 0.01401 | -0.0074    | 0.024    | ZNF259 | BUD13   | ZNF259 |
| 1109 | rs964184   | 11 | 116648917 | XXL.VLDL.TG | Cardioembolic stroke   | -0.1529  | 0.01401 | -0.0127    | 0.0464   | ZNF259 | BUD13   | ZNF259 |
| 1110 | rs964184   | 11 | 116648917 | XXL.VLDL.TG | Myocardial infarction  | -0.1529  | 0.01401 | -0.0487708 | 0.013873 | ZNF259 | BUD13   | ZNF259 |
| 1111 | rs964184   | 11 | 116648917 | XXL.VLDL.TG | Small vessel disease   | -0.1529  | 0.01401 | -0.0253    | 0.0533   | ZNF259 | BUD13   | ZNF259 |
| 1112 | rs964184   | 11 | 116648917 | XXL.VLDL.TG | Coronary heart disease | -0.1529  | 0.01401 | -0.049958  | 0.012399 | ZNF259 | BUD13   | ZNF259 |

Abbreviation: Apo, apolipoprotein; HDL-C, high-density lipoprotein cholesterol; IDL, intermediate density lipoprotein; LDL-C, low-density lipoprotein cholesterol; SD, standard deviation; TC, total cholesterol; TG, triglycerides; VLDL, very low density lipoprotein; XXL.VLDL.TG, triglycerides in largest VLDL; XL.VLDL.TG, triglycerides in very large VLDL; L.VLDL.TG, triglycerides in large VLDL; M.VLDL.TG, triglycerides in medium VLDL; S.VLDL.TG, triglycerides in small VLDL; XS.VLDL.TG, triglycerides in very small VLDL; IDL.TG, triglycerides in IDL; XL.HDL.TG, triglycerides in very large HDL; S.HDL.TG, triglycerides in small HDL

**eTable 2. Summary information of instrumental variables in TSMR analysis.**

| Exposure  | Outcome                | R <sup>2</sup> (%) | Number of SNPs | F. value | Number of Outliers |
|-----------|------------------------|--------------------|----------------|----------|--------------------|
| ApoA1     | Cardioembolic stroke   | 5.03               | 10             | 109.4    | 0                  |
| ApoA1     | Coronary heart disease | 5.67               | 13             | 95.51    | 2                  |
| ApoA1     | Ischemic stroke        | 5.03               | 10             | 109.4    | 0                  |
| ApoA1     | Large vessel disease   | 5.03               | 10             | 109.4    | 0                  |
| ApoA1     | Myocardial infarction  | 5.67               | 13             | 95.51    | 2                  |
| ApoA1     | Small vessel disease   | 5.03               | 10             | 109.4    | 0                  |
| ApoB      | Cardioembolic stroke   | 3.93               | 12             | 70.4     | 0                  |
| ApoB      | Coronary heart disease | 9.93               | 25             | 91.1     | 3                  |
| ApoB      | Ischemic stroke        | 3.7                | 11             | 72.29    | 0                  |
| ApoB      | Large vessel disease   | 3.7                | 11             | 72.29    | 0                  |
| ApoB      | Myocardial infarction  | 9.93               | 25             | 91.1     | 3                  |
| ApoB      | Small vessel disease   | 3.7                | 11             | 72.29    | 0                  |
| HDL.C     | Cardioembolic stroke   | 5.95               | 14             | 97.36    | 0                  |
| HDL.C     | Coronary heart disease | 6.8                | 17             | 92.46    | 3                  |
| HDL.C     | Ischemic stroke        | 5.95               | 14             | 97.36    | 0                  |
| HDL.C     | Large vessel disease   | 5.95               | 14             | 97.36    | 0                  |
| HDL.C     | Myocardial infarction  | 6.8                | 17             | 92.46    | 1                  |
| HDL.C     | Small vessel disease   | 5.95               | 14             | 97.36    | 0                  |
| IDL.TG    | Cardioembolic stroke   | 5.46               | 11             | 101.22   | 0                  |
| IDL.TG    | Coronary heart disease | 10.85              | 27             | 86.75    | 3                  |
| IDL.TG    | Ischemic stroke        | 5.21               | 10             | 105.83   | 0                  |
| IDL.TG    | Large vessel disease   | 5.21               | 10             | 105.83   | 0                  |
| IDL.TG    | Myocardial infarction  | 10.85              | 27             | 86.75    | 1                  |
| IDL.TG    | Small vessel disease   | 5.21               | 10             | 105.83   | 0                  |
| L.VLDL.TG | Cardioembolic stroke   | 2.42               | 6              | 87.9     | 0                  |
| L.VLDL.TG | Coronary heart disease | 3.29               | 9              | 80.18    | 2                  |
| L.VLDL.TG | Ischemic stroke        | 2.42               | 6              | 87.9     | 0                  |
| L.VLDL.TG | Large vessel disease   | 2.42               | 6              | 87.9     | 0                  |
| L.VLDL.TG | Myocardial infarction  | 3.29               | 9              | 80.18    | 2                  |
| L.VLDL.TG | Small vessel disease   | 2.42               | 6              | 87.9     | 0                  |
| LDL.C     | Cardioembolic stroke   | 4.57               | 15             | 68.74    | 0                  |
| LDL.C     | Coronary heart disease | 14.69              | 31             | 119.55   | 3                  |
| LDL.C     | Ischemic stroke        | 4.35               | 14             | 69.96    | 0                  |
| LDL.C     | Large vessel disease   | 4.35               | 14             | 69.96    | 0                  |
| LDL.C     | Myocardial infarction  | 14.69              | 31             | 119.55   | 3                  |
| LDL.C     | Small vessel disease   | 4.35               | 14             | 69.96    | 0                  |
| M.VLDL.TG | Cardioembolic stroke   | 3.26               | 8              | 89.38    | 0                  |
| M.VLDL.TG | Coronary heart disease | 4.52               | 13             | 77.27    | 1                  |
| M.VLDL.TG | Ischemic stroke        | 3.26               | 8              | 89.38    | 0                  |
| M.VLDL.TG | Large vessel disease   | 3.26               | 8              | 89.38    | 0                  |
| M.VLDL.TG | Myocardial infarction  | 4.52               | 13             | 77.27    | 1                  |
| M.VLDL.TG | Small vessel disease   | 3.26               | 8              | 89.38    | 0                  |
| S.HDL.TG  | Cardioembolic stroke   | 3.2                | 7              | 101.63   | 0                  |
| S.HDL.TG  | Coronary heart disease | 4.57               | 13             | 79.43    | 3                  |
| S.HDL.TG  | Ischemic stroke        | 3.2                | 7              | 101.63   | 0                  |
| S.HDL.TG  | Large vessel disease   | 3.2                | 7              | 101.63   | 0                  |
| S.HDL.TG  | Myocardial infarction  | 4.57               | 13             | 79.43    | 3                  |
| S.HDL.TG  | Small vessel disease   | 3.2                | 7              | 101.63   | 0                  |
| S.VLDL.TG | Cardioembolic stroke   | 3.64               | 9              | 90.54    | 0                  |
| S.VLDL.TG | Coronary heart disease | 6.26               | 17             | 84.68    | 3                  |
| S.VLDL.TG | Ischemic stroke        | 3.64               | 9              | 90.54    | 0                  |
| S.VLDL.TG | Large vessel disease   | 3.64               | 9              | 90.54    | 0                  |
| S.VLDL.TG | Myocardial infarction  | 6.09               | 16             | 87.31    | 2                  |
| S.VLDL.TG | Small vessel disease   | 3.64               | 9              | 90.54    | 0                  |
| TC        | Cardioembolic stroke   | 3.18               | 13             | 54.29    | 0                  |
| TC        | Coronary heart disease | 9.75               | 25             | 92.73    | 1                  |

|             |                        |       |    |        |   |
|-------------|------------------------|-------|----|--------|---|
| TC          | Ischemic stroke        | 2.97  | 12 | 54.87  | 1 |
| TC          | Large vessel disease   | 2.97  | 12 | 54.87  | 0 |
| TC          | Myocardial infarction  | 9.75  | 25 | 92.73  | 1 |
| TC          | Small vessel disease   | 2.97  | 12 | 54.87  | 0 |
| TG          | Cardioembolic stroke   | 2.96  | 6  | 109.5  | 0 |
| TG          | Coronary heart disease | 5     | 12 | 94.36  | 3 |
| TG          | Ischemic stroke        | 2.96  | 6  | 109.5  | 0 |
| TG          | Large vessel disease   | 2.96  | 6  | 109.5  | 0 |
| TG          | Myocardial infarction  | 5     | 12 | 94.36  | 1 |
| TG          | Small vessel disease   | 2.96  | 6  | 109.5  | 0 |
| XL.HDL.TG   | Cardioembolic stroke   | 10.4  | 13 | 192.07 | 0 |
| XL.HDL.TG   | Coronary heart disease | 15.15 | 27 | 142.26 | 2 |
| XL.HDL.TG   | Ischemic stroke        | 10.4  | 13 | 192.07 | 0 |
| XL.HDL.TG   | Large vessel disease   | 10.4  | 13 | 192.07 | 0 |
| XL.HDL.TG   | Myocardial infarction  | 15.15 | 27 | 142.26 | 0 |
| XL.HDL.TG   | Small vessel disease   | 10.4  | 13 | 192.07 | 0 |
| XL.VLDL.TG  | Cardioembolic stroke   | 2.43  | 7  | 76.66  | 0 |
| XL.VLDL.TG  | Coronary heart disease | 3.01  | 10 | 66.86  | 5 |
| XL.VLDL.TG  | Ischemic stroke        | 2.43  | 7  | 76.66  | 0 |
| XL.VLDL.TG  | Large vessel disease   | 2.43  | 7  | 76.66  | 0 |
| XL.VLDL.TG  | Myocardial infarction  | 3.01  | 10 | 66.86  | 4 |
| XL.VLDL.TG  | Small vessel disease   | 2.43  | 7  | 76.66  | 0 |
| XS.VLDL.TG  | Cardioembolic stroke   | 4.5   | 10 | 90.66  | 0 |
| XS.VLDL.TG  | Coronary heart disease | 7.53  | 20 | 78.42  | 1 |
| XS.VLDL.TG  | Ischemic stroke        | 4.26  | 9  | 95.22  | 0 |
| XS.VLDL.TG  | Large vessel disease   | 4.26  | 9  | 95.22  | 0 |
| XS.VLDL.TG  | Myocardial infarction  | 7.53  | 20 | 78.42  | 1 |
| XS.VLDL.TG  | Small vessel disease   | 4.26  | 9  | 95.22  | 0 |
| XXL.VLDL.TG | Cardioembolic stroke   | 2.09  | 7  | 65.56  | 0 |
| XXL.VLDL.TG | Coronary heart disease | 2.59  | 9  | 63.62  | 4 |
| XXL.VLDL.TG | Ischemic stroke        | 2.09  | 7  | 65.56  | 0 |
| XXL.VLDL.TG | Large vessel disease   | 2.09  | 7  | 65.56  | 0 |
| XXL.VLDL.TG | Myocardial infarction  | 2.59  | 9  | 63.62  | 3 |
| XXL.VLDL.TG | Small vessel disease   | 2.09  | 7  | 65.56  | 0 |

Number of Outliers was identified form the MR-PRESSO method.

Abbreviation: Apo, apolipoprotein; HDL-C, high-density lipoprotein cholesterol; IDL, intermediate density lipoprotein; LDL-C, low-density lipoprotein cholesterol; SD, standard deviation; TC, total cholesterol; TG, triglycerides; VLDL, very low density lipoprotein; XXL.VLDL.TG, triglycerides in largest VLDL; XL.VLDL.TG, triglycerides in very large VLDL; L.VLDL.TG, triglycerides in large VLDL; M.VLDL.TG, triglycerides in medium VLDL; S.VLDL.TG, triglycerides in small VLDL; XS.VLDL.TG, triglycerides in very small VLDL; IDL.TG, triglycerides in IDL; XL.HDL.TG, triglycerides in very large HDL; S.HDL.TG, triglycerides in small HDL



**eTable 3. In-depth analysis by the MR-TRYX method.**

| Exposure    | Outcome | Raw.OR             | Raw.P | Removed.all.outliers.OR | Removed.all.P | Removed.candidate.outliers.OR | Removed.candidate.outliers.P | Adjusted.OR        | Adjusted.P | Mark1 | Mark2 | Mark3 |
|-------------|---------|--------------------|-------|-------------------------|---------------|-------------------------------|------------------------------|--------------------|------------|-------|-------|-------|
| IDL.TG      | IS      | 0.95(0.84 to 1.08) | 0.462 | 0.89(0.84 to 0.94)      | 0.004         | 0.89(0.84 to 0.94)            | 0.004                        | 0.91(0.85 to 0.98) | 0.031      |       |       |       |
| S.VLDL.TG   | IS      | 1.01(0.88 to 1.18) | 0.855 | 0.97(0.90 to 1.06)      | 0.535         | 0.97(0.90 to 1.06)            | 0.535                        | 0.99(0.90 to 1.10) | 0.893      | √     | √     | √     |
| TC          | IS      | 1.01(0.83 to 1.23) | 0.928 | 0.96(0.81 to 1.14)      | 0.679         | 0.96(0.81 to 1.14)            | 0.679                        | 0.96(0.82 to 1.13) | 0.664      | √     | √     | √     |
| S.HDL.TG    | IS      | 0.99(0.83 to 1.18) | 0.943 | 0.95(0.85 to 1.05)      | 0.346         | 0.95(0.85 to 1.05)            | 0.346                        | 0.96(0.86 to 1.07) | 0.470      | √     | √     | √     |
| XS.VLDL.TG  | IS      | 0.97(0.84 to 1.11) | 0.643 | 0.91(0.84 to 0.98)      | 0.048         | 0.91(0.84 to 0.98)            | 0.048                        | 0.93(0.85 to 1.01) | 0.136      |       |       | √     |
| TC          | CHD     | 1.44(1.31 to 1.59) | 0.000 | 1.40(1.28 to 1.52)      | 0.000         | 1.40(1.28 to 1.52)            | 0.000                        | 1.40(1.29 to 1.52) | 0.000      | √     | √     | √     |
| XL.VLDL.TG  | CHD     | 0.92(0.59 to 1.45) | 0.735 | 1.06(0.96 to 1.17)      | 0.325         | 1.06(0.96 to 1.17)            | 0.325                        | 1.04(0.98 to 1.11) | 0.254      | √     | √     | √     |
| XS.VLDL.TG  | CHD     | 1.30(1.19 to 1.42) | 0.000 | 1.26(1.17 to 1.36)      | 0.000         | 1.26(1.17 to 1.36)            | 0.000                        | 1.26(1.18 to 1.35) | 0.000      | √     | √     | √     |
| ApoB        | CHD     | 1.49(1.34 to 1.66) | 0.000 | 1.44(1.32 to 1.57)      | 0.000         | 1.44(1.32 to 1.57)            | 0.000                        | 1.44(1.32 to 1.57) | 0.000      | √     | √     | √     |
| TG          | CHD     | 1.28(1.13 to 1.46) | 0.003 | 1.28(1.15 to 1.43)      | 0.002         | 1.28(1.15 to 1.43)            | 0.002                        | 1.29(1.17 to 1.42) | 0.000      | √     | √     | √     |
| M.VLDL.TG   | CHD     | 1.19(1.06 to 1.34) | 0.011 | 1.22(1.10 to 1.36)      | 0.004         | 1.22(1.10 to 1.36)            | 0.004                        | 1.22(1.10 to 1.35) | 0.003      | √     | √     | √     |
| L.VLDL.TG   | CHD     | 1.08(0.75 to 1.56) | 0.685 | 1.23(1.11 to 1.37)      | 0.005         | 1.23(1.11 to 1.37)            | 0.005                        | 1.23(1.12 to 1.36) | 0.003      |       |       |       |
| S.VLDL.TG   | CHD     | 1.23(1.10 to 1.38) | 0.002 | 1.20(1.10 to 1.32)      | 0.002         | 1.20(1.10 to 1.32)            | 0.002                        | 1.20(1.11 to 1.30) | 0.000      | √     | √     | √     |
| XL.HDL.TG   | CHD     | 1.09(1.03 to 1.15) | 0.005 | 1.10(1.05 to 1.15)      | 0.001         | 1.10(1.05 to 1.15)            | 0.001                        | 1.10(1.05 to 1.15) | 0.001      | √     | √     | √     |
| IDL.TG      | CHD     | 1.33(1.21 to 1.47) | 0.000 | 1.28(1.20 to 1.38)      | 0.000         | 1.28(1.20 to 1.38)            | 0.000                        | 1.28(1.20 to 1.37) | 0.000      | √     | √     | √     |
| XXL.VLDL.TG | CHD     | 1.03(0.67 to 1.56) | 0.910 | 1.09(0.94 to 1.26)      | 0.327         | 1.09(0.94 to 1.26)            | 0.327                        | 1.07(0.97 to 1.18) | 0.200      | √     | √     | √     |
| ApoA1       | CHD     | 1.04(0.93 to 1.16) | 0.484 | 1.13(1.03 to 1.25)      | 0.031         | 1.13(1.03 to 1.25)            | 0.031                        | 1.12(1.03 to 1.23) | 0.024      |       |       |       |
| LDL.C       | CHD     | 1.39(1.27 to 1.51) | 0.000 | 1.35(1.26 to 1.44)      | 0.000         | 1.35(1.26 to 1.44)            | 0.000                        | 1.35(1.27 to 1.44) | 0.000      | √     | √     | √     |
| S.HDL.TG    | CHD     | 1.29(1.10 to 1.53) | 0.010 | 1.25(1.14 to 1.38)      | 0.001         | 1.25(1.14 to 1.38)            | 0.001                        | 1.24(1.14 to 1.35) | 0.000      | √     | √     | √     |
| HDL.C       | CHD     | 1.00(0.90 to 1.12) | 0.929 | 1.09(0.99 to 1.20)      | 0.099         | 1.09(0.99 to 1.20)            | 0.099                        | 1.07(0.99 to 1.16) | 0.127      | √     | √     | √     |
| ApoB        | MI      | 1.47(1.30 to 1.65) | 0.000 | 1.41(1.29 to 1.54)      | 0.000         | 1.41(1.29 to 1.54)            | 0.000                        | 1.41(1.29 to 1.54) | 0.000      | √     | √     | √     |
| LDL.C       | MI      | 1.37(1.24 to 1.50) | 0.000 | 1.33(1.24 to 1.42)      | 0.000         | 1.33(1.24 to 1.42)            | 0.000                        | 1.33(1.25 to 1.42) | 0.000      | √     | √     | √     |
| XS.VLDL.TG  | MI      | 1.28(1.18 to 1.38) | 0.000 | 1.25(1.16 to 1.34)      | 0.000         | 1.25(1.16 to 1.34)            | 0.000                        | 1.25(1.17 to 1.34) | 0.000      | √     | √     | √     |
| IDL.TG      | MI      | 1.30(1.19 to 1.42) | 0.000 | 1.27(1.19 to 1.37)      | 0.000         | 1.27(1.19 to 1.37)            | 0.000                        | 1.27(1.19 to 1.37) | 0.000      | √     | √     | √     |
| L.VLDL.TG   | MI      | 1.09(0.78 to 1.54) | 0.622 | 1.20(1.08 to 1.33)      | 0.013         | 1.20(1.08 to 1.33)            | 0.013                        | 1.18(1.09 to 1.29) | 0.005      |       |       |       |
| HDL.C       | MI      | 1.01(0.92 to 1.11) | 0.828 | 0.98(0.90 to 1.07)      | 0.620         | 0.98(0.90 to 1.07)            | 0.620                        | 0.98(0.90 to 1.06) | 0.613      | √     | √     | √     |
| ApoA1       | MI      | 1.04(0.94 to 1.15) | 0.462 | 1.12(1.02 to 1.23)      | 0.040         | 1.12(1.02 to 1.23)            | 0.040                        | 1.11(1.03 to 1.21) | 0.025      |       |       |       |
| S.HDL.TG    | MI      | 1.27(1.09 to 1.48) | 0.009 | 1.24(1.15 to 1.34)      | 0.000         | 1.24(1.15 to 1.34)            | 0.000                        | 1.23(1.14 to 1.32) | 0.000      | √     | √     | √     |

|             |    |                    |       |                    |       |                    |       |                    |       |   |   |   |
|-------------|----|--------------------|-------|--------------------|-------|--------------------|-------|--------------------|-------|---|---|---|
| XL.VLDL.TG  | MI | 0.93(0.61 to 1.42) | 0.741 | 1.08(0.96 to 1.22) | 0.251 | 1.08(0.96 to 1.22) | 0.251 | 1.02(0.92 to 1.12) | 0.767 | √ | √ | √ |
| S.VLDL.TG   | MI | 1.23(1.11 to 1.36) | 0.001 | 1.25(1.14 to 1.37) | 0.000 | 1.25(1.14 to 1.37) | 0.000 | 1.24(1.14 to 1.36) | 0.000 | √ | √ | √ |
| TC          | MI | 1.40(1.27 to 1.53) | 0.000 | 1.36(1.25 to 1.48) | 0.000 | 1.36(1.25 to 1.48) | 0.000 | 1.36(1.25 to 1.48) | 0.000 | √ | √ | √ |
| TG          | MI | 1.28(1.12 to 1.45) | 0.003 | 1.24(1.11 to 1.38) | 0.003 | 1.24(1.11 to 1.38) | 0.003 | 1.24(1.12 to 1.37) | 0.002 | √ | √ | √ |
| XXL.VLDL.TG | MI | 1.04(0.70 to 1.54) | 0.865 | 1.13(0.96 to 1.33) | 0.211 | 1.13(0.96 to 1.33) | 0.211 | 1.13(1.00 to 1.28) | 0.093 | √ | √ | √ |
| M.VLDL.TG   | MI | 1.19(1.08 to 1.32) | 0.006 | 1.22(1.12 to 1.34) | 0.001 | 1.22(1.12 to 1.34) | 0.001 | 1.22(1.12 to 1.33) | 0.001 | √ | √ | √ |

Mark1: √ represent consistent results of Removed.all.outliers.OR and Raw.OR

Mark2: √ represent consistent results of Removed.candidate.outliers.OR and Raw.OR

Mark3: √ represent consistent results of Adjusted.OR and Raw.OR

The consistent results were defined as the same causal directions and significance.

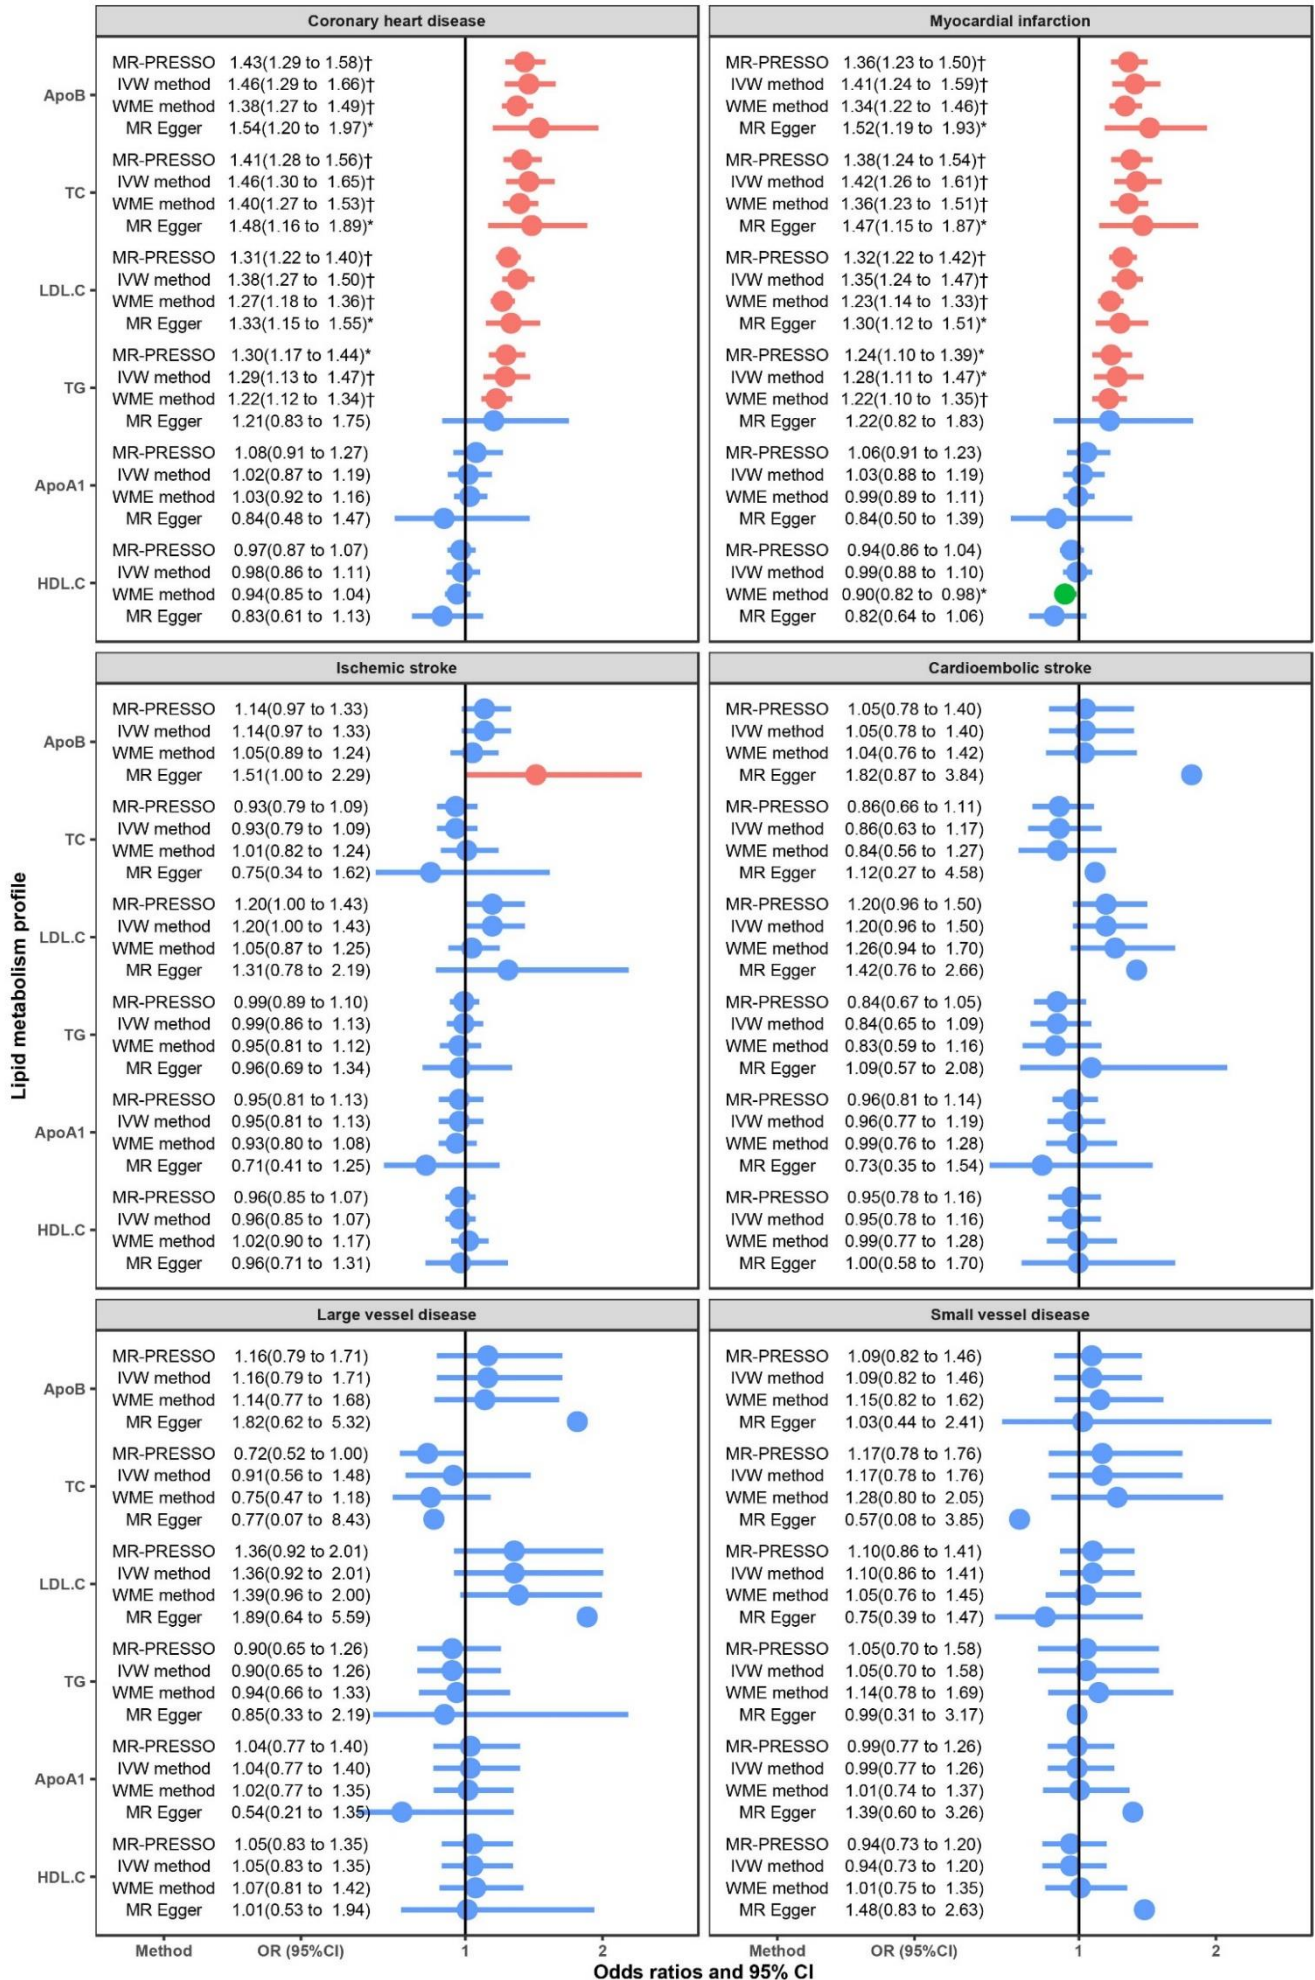

Odds ratios and 95% CI

**eFigure 1. Causal relationship between main lipoprotein/lipids and CVDs in sensitivity analysis.**

Red error bar: significantly positive association.

Green error bar: significantly negative association.

Blue error bar: insignificant association.

\*:  $P < 0.05$ .

†: Significant result after Bonferroni correction.

§: Results with potential horizontal pleiotropic tested by MR-Egger method.

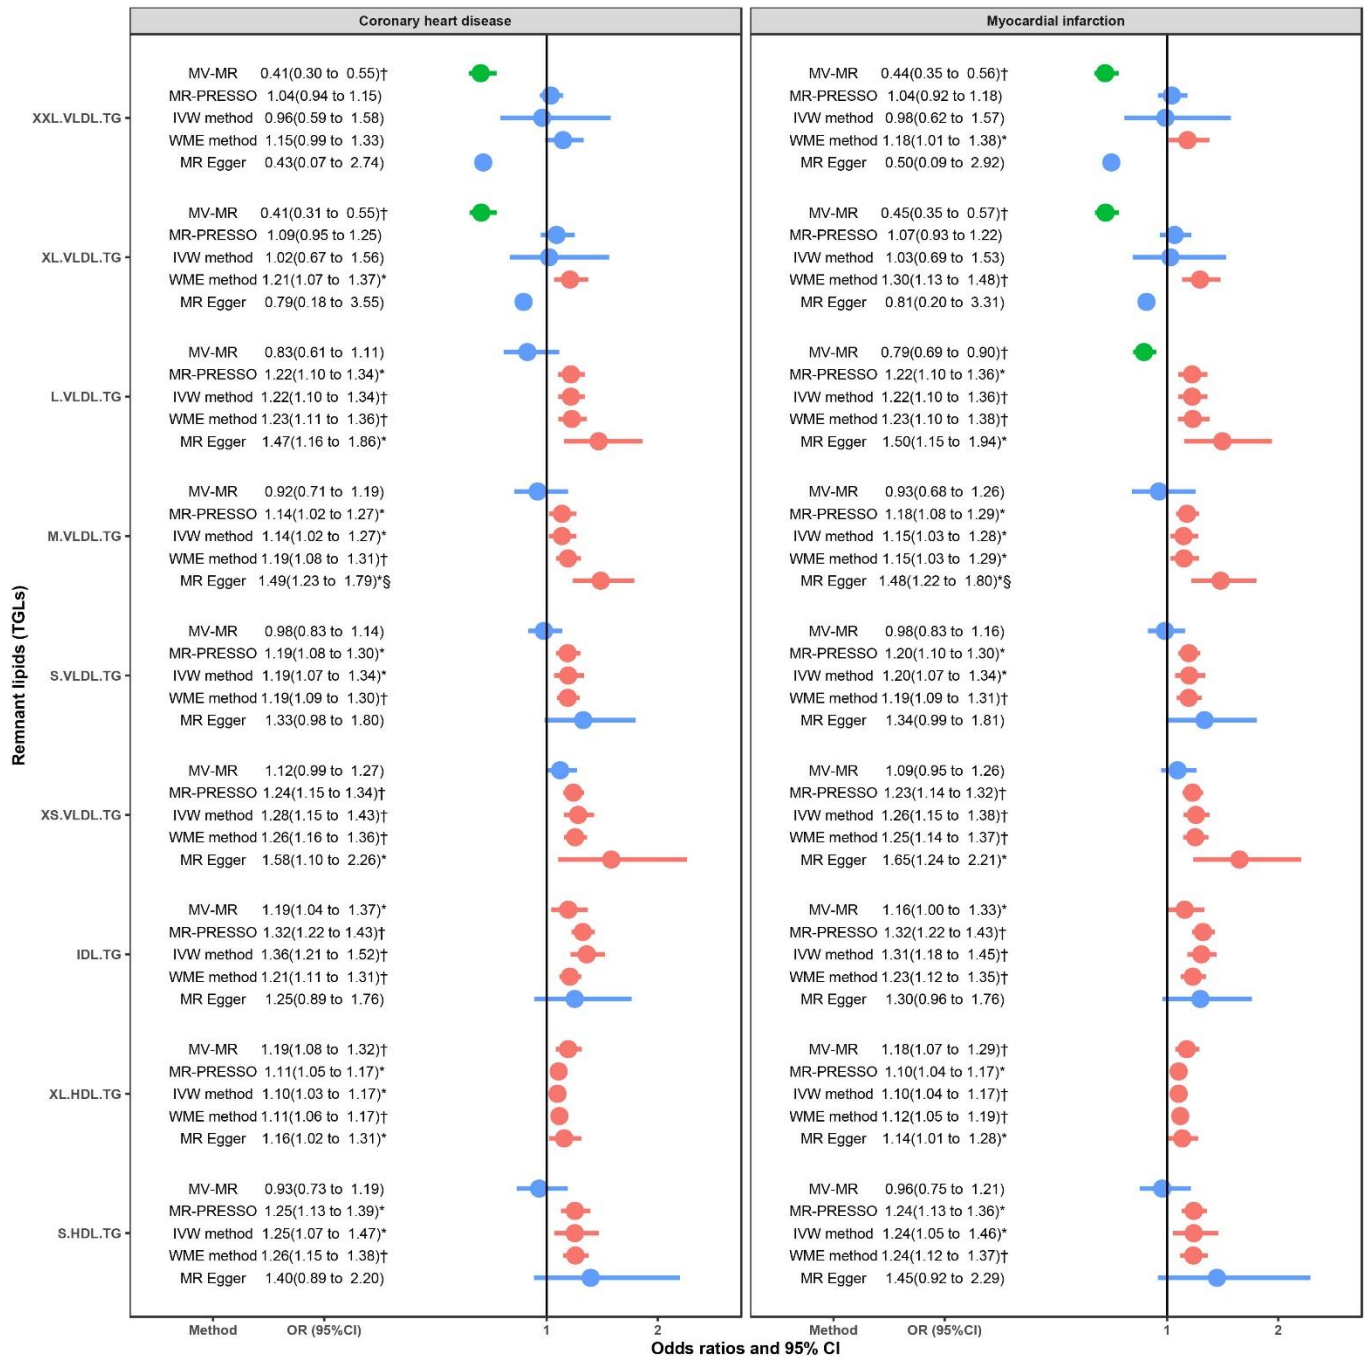

**eFigure 2. Causal relationship between circulating remnant lipids and CHD and MI in sensitivity analysis.**

Red error bar: significantly positive association.

Green error bar: significantly negative association.

Blue error bar: insignificant association.

\*:  $P < 0.05$ .

†: Significant result after Bonferroni correction.

§: Results with potential horizontal pleiotropic tested by MR-Egger method.

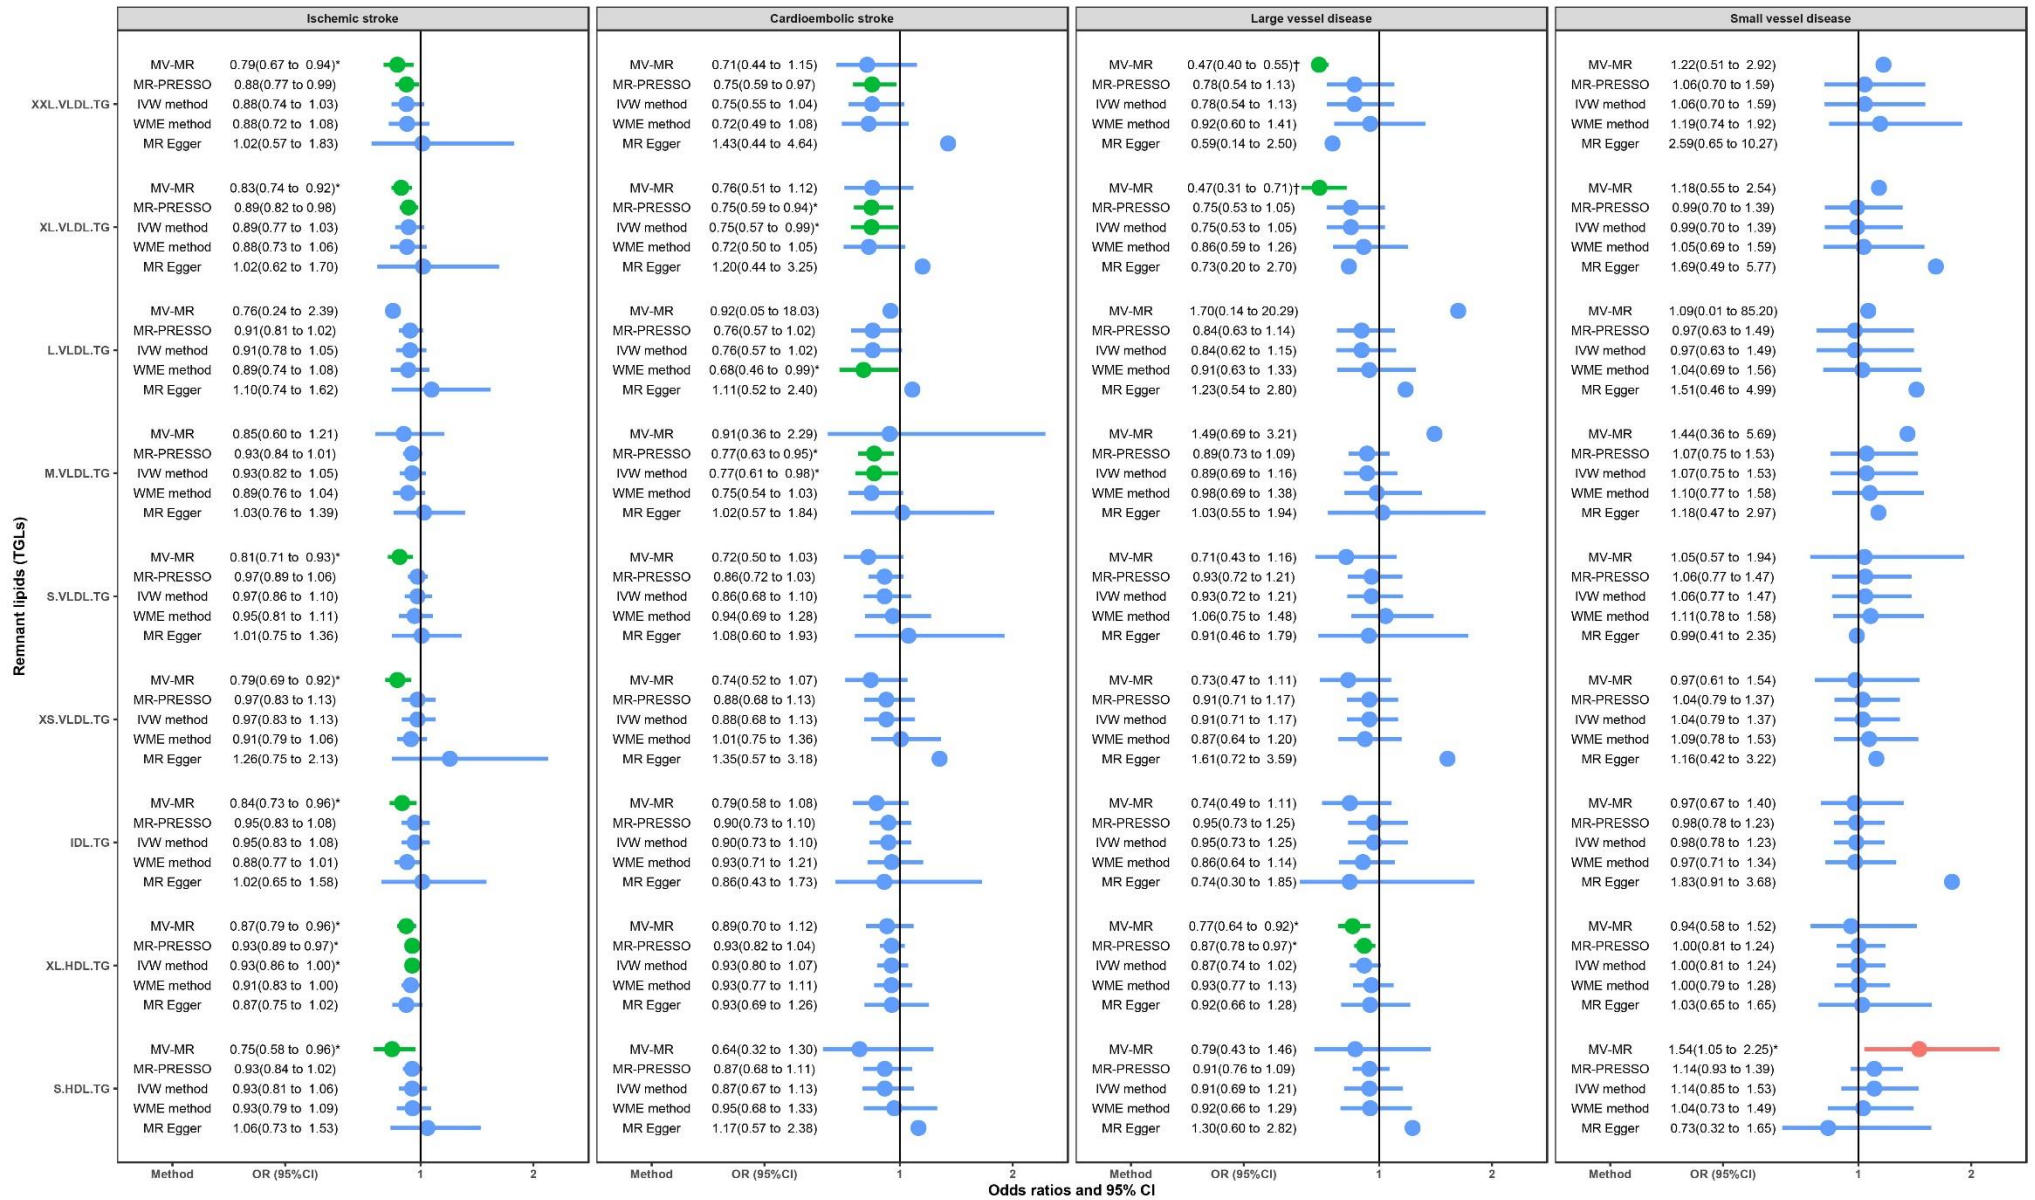

**eFigure 3. Causal relationship between circulating remnant lipids and IS and subtypes in sensitivity analysis.**

Red error bar: significantly positive association.

Green error bar: significantly negative association.

Blue error bar: insignificant association.

\*:  $P < 0.05$ .

†: Significant result after Bonferroni correction.

§: Results with potential horizontal pleiotropic tested by MR-Egger method.
